# Supplementary material for: Design, synthesis, and antiproliferative evaluation of novel longifolene-derived tetraline pyrimidine derivatives with fluorescence properties
Source: Royal Society of Chemistry journal article supplement (doi:10.1039/d2nj01054b), 2022-01-01
Supplement: d2nj01054b1.pdf [file d2nj01054b1.pdf]

**Electronic Supplementary Material (ESI) for New Journal of Chemistry**

**Design, Synthesis, and Antiproliferative Evaluation of Novel  
Longifolene-derived Tetraline Pyrimidine Derivatives with  
Fluorescence Property**

Qing-Min Li, Gui-Shan Lin, \* Wen-Gui Duan, \* Yu-Cheng Cui, Fu-Hou Lei, and  
Fang-Yao Li

\* Corresponding Author. Gui-Shan Lin and Wen-Gui Duan

E-mail address: Guishan Lin, [gslin@gxu.edu.cn](mailto:gslin@gxu.edu.cn); Wengui Duan, [wgduan@gxu.edu.cn](mailto:wgduan@gxu.edu.cn).

**Supporting Information**

|                                                                                   |    |
|-----------------------------------------------------------------------------------|----|
| 1. General experimental information.....                                          | S2 |
| 2. Synthetic route of target compounds <b>5a-5r</b> .....                         | S2 |
| 3. IR, NMR and MS data for compounds <b>4</b> and <b>5</b> .....                  | S3 |
| 4. The table for molecular docking-based virtual screening.....                   | S7 |
| 5. The copies of IR, NMR and MS spectra for compounds <b>4</b> and <b>5</b> ..... | S8 |

## 1. General experimental information

FT-IR,  $^1\text{H}$  NMR,  $^{13}\text{C}$  NMR, ESI-MS, and elemental analysis were employed to characterize the structure of the target compounds, and the characterization data were included in Supporting Information. FT-IR spectra were recorded by a Nicolet iS50 FT-IR spectrometer using KBr pellets.  $^1\text{H}$  and  $^{13}\text{C}$  NMR spectra were recorded in a  $\text{CDCl}_3$  using a Bruker AVANCE AV-600 spectrometer and TMS as an internal standard. The mass spectra were obtained from the TSQ Quantum Access MAX HPLC-MS instrument. The elemental analyses were tested on PerkinElmer 2400II Elemental Analyzer. Fluorescence spectra were obtained by Hitachi F4700 fluorescence spectrophotometer. The UV-vis absorption spectra were estimated on the UV-1800 ultraviolet-visible spectrophotometer. The melting points of the target compounds were measured on a Hanon MP420 automatic melting point apparatus. XO-SM50 program-controlled ultrasonic-microwave reaction system. Longifolene (GC purity 85%) (**1**) was provided by Wuzhou Pine Chemicals Co., Ltd., Wuzhou, China. All the other reagents were purchased from commercial suppliers and used without further purification.

## 2. Synthetic Route of Target Compounds 5a-5r

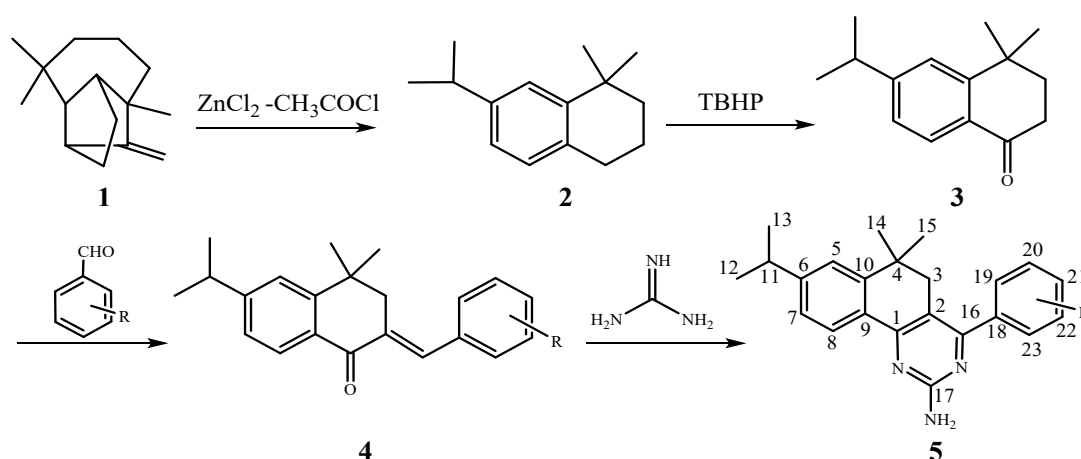

5a: R= *o*-F; 5b: R= *m*-F; 5c: R= *p*-F; 5d: R= *o*-Cl; 5e: R= *m*-Cl; 5f: R= *p*-Cl; 5g: R= *o*-Br; 5h: R= *m*-Br; 5i: R= *p*-Br; 5j: R= *m*-CN; 5k: R= *p*-CN; 5l: R= *o*-CH<sub>3</sub>; 5m: R= *p*-CH<sub>3</sub>; 5n: R= *m*-OCH<sub>3</sub>; 5o: R= *p*-OCH<sub>3</sub>; 5p: R= *m*-CF<sub>3</sub>; 5q: R= *p*-OCF<sub>3</sub>; 5r: R= H;

Scheme 1. Synthetic Route of Target Compounds **5a-5r**

### 3. IR, NMR and MS data for compound 4 and 5

Compound **4a**: Yellow liquid; yield 85.6%; IR (KBr)  $\nu_{\max}$  3065 (Ar-H), 2961, 2929, 2871 (C-H), 1671 (C=O), 1602 (C=C);  $^1\text{H}$  NMR (600 MHz,  $\text{CDCl}_3$ ):  $\delta$  = 8.09 (d,  $J$  = 8.1 Hz, 1H), 7.92 (s, 1H), 7.37 – 7.32 (m, 1H), 7.28 (ddd,  $J$  = 13.5, 5.6, 2.6 Hz, 1H), 7.25 (d,  $J$  = 1.5 Hz, 1H), 7.20 (dd,  $J$  = 8.1, 1.6 Hz, 1H), 7.14 (td,  $J$  = 7.5, 0.8 Hz, 1H), 7.06 (t,  $J$  = 9.1 Hz, 1H), 2.94 (hept,  $J$  = 6.9 Hz, 1H), 2.84 (s, 1H), 1.29 (s, 3H), 1.26 (d,  $J$  = 7.0 Hz, 3H);  $^{13}\text{C}$  NMR (151 MHz,  $\text{CDCl}_3$ ):  $\delta$  = 186.67, 161.25, 159.59, 154.98, 151.58, 136.17, 130.34, 130.32, 129.99, 129.94, 129.66, 129.64, 129.62, 128.60, 124.63, 123.63, 123.60, 122.47, 115.55, 115.41, 41.87, 34.75, 34.39, 29.64, 23.42; ESI-MS  $m/z$  323.12  $[\text{M}+\text{H}]^+$ . Anal. Calcd. For  $\text{C}_{22}\text{H}_{23}\text{FO}$ : C, 81.95; H, 7.19. Found: C, 81.93; H, 7.21.

Compound **4b**: Yellow liquid; yield 80.3%; IR (KBr)  $\nu_{\max}$  3063 (Ar-H), 2961, 2928 (C-H), 1670 (C=O), 1604 (C=C);  $^1\text{H}$  NMR (600 MHz,  $\text{CDCl}_3$ ):  $\delta$  = 8.08 (d,  $J$  = 8.0 Hz, 1H), 7.87 (s, 1H), 7.33 (td,  $J$  = 7.9, 6.2 Hz, 1H), 7.26 (d,  $J$  = 1.2 Hz, 1H), 7.23 – 7.16 (m, 1H), 7.11 (d,  $J$  = 9.7 Hz, 1H), 6.99 (td,  $J$  = 8.4, 2.2 Hz, 1H), 2.99 – 2.91 (m, 2H), 1.31 (s, 3H), 1.26 (d,  $J$  = 7.0 Hz, 3H);  $^{13}\text{C}$  NMR (151 MHz,  $\text{CDCl}_3$ ):  $\delta$  = 186.88, 163.17, 161.54, 154.99, 151.35, 137.90, 137.85, 135.29, 135.11, 129.76, 129.71, 129.69, 128.62, 125.31, 125.30, 124.67, 122.40, 116.05, 115.90, 115.01, 114.87, 41.48, 34.71, 34.40, 29.71, 23.43; ESI-MS  $m/z$  323.12  $[\text{M}+\text{H}]^+$ . Anal. Calcd. For  $\text{C}_{22}\text{H}_{23}\text{FO}$ : C, 81.95; H, 7.19. Found: C, 81.96; H, 7.20.

Compound **4c**: White solid; yield 90.5%; m.p 102.5-114.2 °C; IR (KBr)  $\nu_{\max}$  3063, 3039 (Ar-H), 2959, 2928, 2868 (C-H), 1659 (C=O), 1610 (C=C);  $^1\text{H}$  NMR (600 MHz,  $\text{CDCl}_3$ ):  $\delta$  = 8.09 (d,  $J$  = 8.0 Hz, 1H), 7.89 (s, 1H), 7.46 – 7.39 (m, 1H), 7.28 – 7.21

(m, 1H), 7.15 – 7.07 (m, 1H), 3.01 – 2.93 (m, 2H), 1.34 (s, 3H), 1.29 (d,  $J = 6.9$  Hz, 3H);  $^{13}\text{C}$  NMR (151 MHz,  $\text{CDCl}_3$ ):  $\delta = 187.48, 163.32, 161.67, 155.18, 151.51, 135.96, 134.09, 131.98, 131.96, 131.64, 131.58, 130.00, 128.79, 124.87, 122.57, 115.55, 115.41, 41.73, 34.92, 34.64, 29.95, 23.67$ ; ESI-MS  $m/z$  323.12  $[\text{M}+\text{H}]^+$ . Anal. Calcd. For  $\text{C}_{22}\text{H}_{23}\text{FO}$ : C, 81.95; H, 7.19. Found: C, 81.94; H, 7.22.

Compound **4d**: Yellow liquid, yield 80.0%; IR (KBr)  $\nu_{\text{max}}$  3059 (Ar-H), 2960, 2926 (C-H), 1671 (C=O), 1603 (C=C);  $^1\text{H}$  NMR (600 MHz,  $\text{CDCl}_3$ ):  $\delta = 8.13$  (d,  $J = 8.0$  Hz, 1H), 7.96 (s, 1H), 7.46 – 7.41 (m, 1H), 7.34 – 7.22 (m, 2H), 3.03 – 2.91 (m, 1H), 2.81 (s, 1H), 1.31 (s, 3H), 1.29 (d,  $J = 7.0$  Hz, 3H);  $^{13}\text{C}$  NMR (151 MHz,  $\text{CDCl}_3$ ):  $\delta = 187.26, 155.25, 151.77, 135.91, 134.59, 134.50, 134.09, 130.20, 129.73, 129.53, 129.32, 128.71, 126.26, 124.81, 122.71, 41.75, 35.06, 34.55, 29.74, 23.58$ ; ESI-MS  $m/z$  323.12  $[\text{M}+\text{H}]^+$ . Anal. Calcd. For  $\text{C}_{22}\text{H}_{23}\text{ClO}$ : C, 77.98; H, 6.84. Found: C, 77.99; H, 6.82.

Compound **4e**: Yellow liquid; yield 88.3%; IR (KBr)  $\nu_{\text{max}}$  3061 (Ar-H), 2960, 2930 (C-H), 1664 (C=O), 1607 (C=C);  $^1\text{H}$  NMR (600 MHz,  $\text{CDCl}_3$ ):  $\delta = 8.09$  (d,  $J = 8.0$  Hz, 1H), 7.85 (s, 1H), 7.41 (s, 1H), 7.37 – 7.29 (m, 2H), 7.27 – 7.22 (m, 1H), 3.02 – 2.93 (m, 2H), 1.34 (s, 3H), 1.30 (d,  $J = 6.9$  Hz, 3H);  $^{13}\text{C}$  NMR (151 MHz,  $\text{CDCl}_3$ )  $\delta = 187.29, 155.32, 151.61, 137.74, 135.45, 135.39, 134.28, 129.82, 129.65, 129.40, 128.82, 128.28, 127.78, 124.92, 122.63, 41.68, 35.00, 34.63, 29.95, 23.65$ ; ESI-MS  $m/z$  323.12  $[\text{M}+\text{H}]^+$ . Anal. Calcd. For  $\text{C}_{22}\text{H}_{23}\text{ClO}$ : C, 77.98; H, 6.84. Found: C, 77.95; H, 6.85.

Compound **4f**: Yellow solid; yield 84.5%; m.p 98.7-101.6 °C; IR (KBr)  $\nu_{\max}$  3033 (Ar-H), 2959, 2928, 2870 (C-H), 1659 (C=O), 1605 (C=C);  $^1\text{H}$  NMR (600 MHz,  $\text{CDCl}_3$ ):  $\delta$  = 8.08 (d,  $J$  = 7.9 Hz, 1H), 7.87 (s, 1H), 7.41 – 7.35 (m, 2H), 7.27 – 7.22 (m, 1H), 2.99 (dt,  $J$  = 13.8, 6.9 Hz, 1H), 2.94 (d,  $J$  = 1.8 Hz, 1H), 1.33 (s, 3H), 1.29 (d,  $J$  = 6.9 Hz, 3H);  $^{13}\text{C}$  NMR (151 MHz,  $\text{CDCl}_3$ ):  $\delta$  = 187.41, 155.28, 151.56, 135.74, 134.82, 134.36, 134.23, 131.02, 129.93, 128.83, 128.66, 124.92, 122.62, 41.80, 34.98, 34.66, 29.97, 23.68; ESI-MS  $m/z$  323.12  $[\text{M}+\text{H}]^+$ . Anal. Calcd. For  $\text{C}_{22}\text{H}_{23}\text{ClO}$ : C, 77.98; H, 6.84. Found: C, 77.98; H, 6.86.

Compound **4i**: Yellow solid; yield 89.6%; m.p 125.6-126.5 °C; IR (KBr)  $\nu_{\max}$  3061, 3026 (Ar-H), 2958, 2935, 2863 (C-H), 1662 (C=O), 1607 (C=C);  $^1\text{H}$  NMR (600 MHz,  $\text{CDCl}_3$ ):  $\delta$  = 8.08 (d,  $J$  = 7.9 Hz, 1H), 7.84 (s, 1H), 7.57 – 7.52 (m, 1H), 7.30 (d,  $J$  = 8.4 Hz, 1H), 7.27 – 7.22 (m, 1H), 3.01 – 2.95 (m, 1H), 2.94 (t,  $J$  = 5.2 Hz, 1H), 1.33 (s, 3H), 1.29 (d,  $J$  = 6.9 Hz, 3H);  $^{13}\text{C}$  NMR (151 MHz,  $\text{CDCl}_3$ ):  $\delta$  = 187.40, 155.30, 151.56, 135.75, 134.92, 134.81, 131.62, 131.26, 129.91, 128.83, 124.93, 122.62, 122.51, 41.80, 34.98, 34.66, 29.97, 23.68.

Compound **4k**: White solid; yield 82.3%; m.p 135.6-136.4 °C; IR (KBr)  $\nu_{\max}$  2959, 2939, 2871 (C-H), 2222 (C $\equiv$ N), 1664 (C=O), 1610 (C=C);  $^1\text{H}$  NMR (600 MHz,  $\text{CDCl}_3$ )  $\delta$  8.08 (d,  $J$  = 8.5 Hz, 1H), 7.87 (s, 1H), 7.71 (d,  $J$  = 8.3 Hz, 1H), 7.51 (d,  $J$  = 8.1 Hz, 1H), 7.27 – 7.23 (m, 1H), 3.01 – 2.95 (m, 1H), 2.92 (d,  $J$  = 1.8 Hz, 1H), 1.33 (s, 3H), 1.29 (d,  $J$  = 6.9 Hz, 3H);  $^{13}\text{C}$  NMR (151 MHz,  $\text{CDCl}_3$ )  $\delta$  187.03, 155.66, 151.57, 140.65, 136.93, 134.60, 132.16, 130.10, 129.63, 128.93, 125.09, 122.72, 118.62, 111.65, 41.83, 35.09, 34.68, 30.00, 23.65.

Compound **4m**: White solid; yield 82.9%; m.p 150.6-151.7 °C; IR (KBr)  $\nu_{\max}$  3023 (Ar-H), 2959, 2924, 2868 (C-H), 1658 (C=O), 1608 (C=C);  $^1\text{H}$  NMR (600 MHz,  $\text{CDCl}_3$ ):  $\delta$  = 8.08 (d,  $J$  = 8.0 Hz, 1H), 7.93 (s, 1H), 7.37 (d,  $J$  = 8.0 Hz, 1H), 7.28 – 7.20 (m, 2H), 3.02 – 2.93 (m, 2H), 2.40 (s, 2H), 1.33 (s, 3H), 1.30 (d,  $J$  = 6.9 Hz, 3H);  $^{13}\text{C}$  NMR (151 MHz,  $\text{CDCl}_3$ ):  $\delta$  = 187.74, 155.01, 151.60, 138.55, 137.33, 133.48, 133.08, 130.19, 129.90, 129.13, 128.77, 124.81, 122.53, 41.85, 34.91, 34.65, 29.96, 23.70, 21.38.

Compound **4n**: Yellow solid; yield 86.7%; m.p 95.3-96.7 °C; IR (KBr)  $\nu_{\max}$  3063 (Ar-H), 2960, 2933, 2869 (C-H), 1667 (C=O), 1602 (C=C);  $^1\text{H}$  NMR (600 MHz,  $\text{CDCl}_3$ ):  $\delta$  = 8.08 (d,  $J$  = 8.0 Hz, 1H), 7.90 (s, 1H), 7.33 (t,  $J$  = 7.9 Hz, 1H), 7.27 – 7.21 (m, 2H), 7.04 (d,  $J$  = 7.6 Hz, 1H), 6.97 (s, 1H), 6.90 (dd,  $J$  = 8.2, 2.2 Hz, 1H), 3.84 (s, 3H), 3.04 – 2.89 (m, 3H), 1.33 (s, 6H), 1.29 (d,  $J$  = 6.9 Hz, 6H);  $^{13}\text{C}$  NMR (151 MHz,  $\text{CDCl}_3$ ):  $\delta$  = 187.63, 159.43, 155.12, 151.68, 137.27, 137.01, 134.48, 130.04, 129.36, 128.78, 124.82, 122.58, 122.13, 115.27, 113.80, 55.21, 41.77, 34.93, 34.63, 29.94, 23.67. ESI-MS  $m/z$  335.12  $[\text{M}+\text{H}]^+$ . Anal. Calcd. For  $\text{C}_{23}\text{H}_{26}\text{O}_2$ : C, 82.60; H, 7.84. Found: C, 82.61; H, 7.83.

Compound **4o**: White solid; yield 92.5%; m.p 118.6-119.5 °C; IR (KBr)  $\nu_{\max}$  3063, 3001 (Ar-H), 2958, 2929 (C-H), 1656 (C=O), 1604 (C=C);  $^1\text{H}$  NMR (600 MHz,  $\text{CDCl}_3$ ):  $\delta$  = 8.08 (d,  $J$  = 8.0 Hz, 1H), 7.92 (s, 1H), 7.44 (d,  $J$  = 8.7 Hz, 2H), 7.27 – 7.21 (m, 2H), 6.96 (d,  $J$  = 8.7 Hz, 2H), 3.85 (s, 3H), 3.12 – 2.92 (m, 3H), 1.34 (s, 6H), 1.29 (d,  $J$  = 6.9 Hz, 6H);  $^{13}\text{C}$  NMR (151 MHz,  $\text{CDCl}_3$ ):  $\delta$  = 187.63, 159.78, 154.87, 151.42, 137.09, 132.33, 131.62, 130.25, 128.70, 128.44, 124.74, 122.45, 113.87,

55.24, 41.87, 34.81, 34.61, 29.96, 23.68; ESI-MS  $m/z$  335.12  $[M+H]^+$ . Anal. Calcd.

For  $C_{23}H_{26}O_2$ : C, 82.60; H, 7.84. Found: C, 82.62; H, 7.80.

**Table 1** The part result of molecular docking-based virtual screening for the designed compounds in descending order by  $D\_score$  and  $PMF\_score$  based on the crystal structure of the survivin / Smac / DIABLO complex.

|   | Name         | Structure | 1: Total_Score | 2: Crash | 3: Polar | 4: D_score | 5: PMF_score | 6: G_score | 7: ChemScore | 8: CSCORE |
|---|--------------|-----------|----------------|----------|----------|------------|--------------|------------|--------------|-----------|
| 1 | M9_000       |           | 2.6669         | -0.5276  | 0        | -73.422    | -22.133      | -133.9694  | -11.4982     | 0         |
| 2 | M78_000      |           | 2.3537         | -0.9733  | 0.001    | -81.3984   | -23.3449     | -145.9704  | -13.8312     | 1         |
| 3 | M10_000      |           | 2.775          | -1.0637  | 0.0007   | -77.4465   | -25.5063     | -144.3601  | -12.5208     | 3         |
| 4 | M28_000      |           | 4.4502         | -0.5834  | 0.0007   | -88.4459   | -26.0985     | -152.3659  | -11.5425     | 3         |
| 5 | NSC80467_000 |           | 3.2742         | -0.9636  | 2.4322   | -90.1598   | -26.2117     | -130.0601  | -17.7099     | 3         |
| 6 | M6_000       |           | 2.4948         | -0.5151  | 0        | -73.7993   | -29.12       | -123.2901  | -10.5428     | 2         |
| 7 | M14_000      |           | 1.1493         | -0.8791  | 0        | -80.1796   | -29.3566     | -134.7637  | -17.991      | 2         |

Rows: (0/89) Data Columns: (2/8) | Visible Rows: 89 | Filtered Rows: 0 | Marked Rows: 0

5. The copies of IR, NMR and MS spectra for compounds 4 and 5

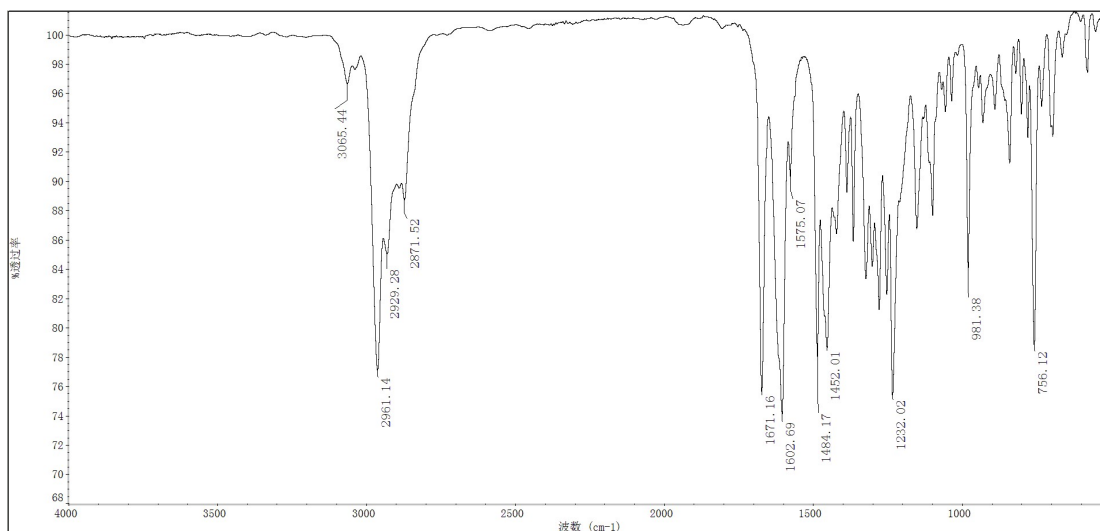

Figure 1. IR spectrum of compound 4a

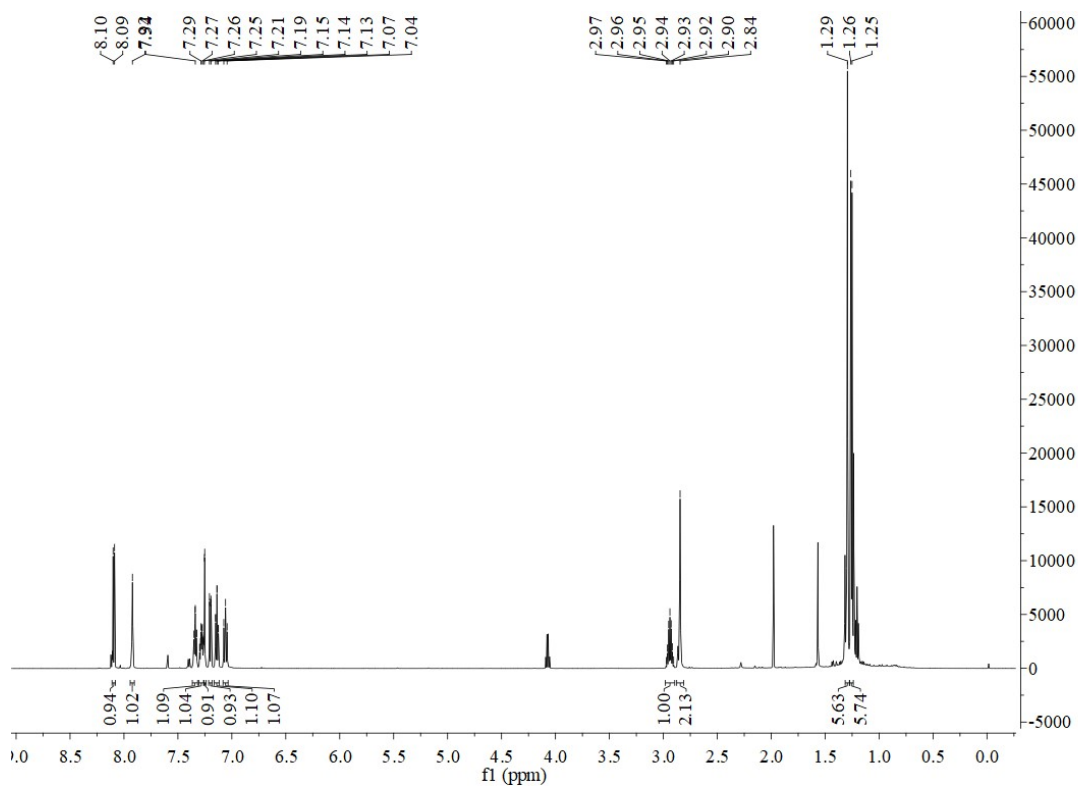

Figure 2. <sup>1</sup>H NMR spectrum of compound 4a



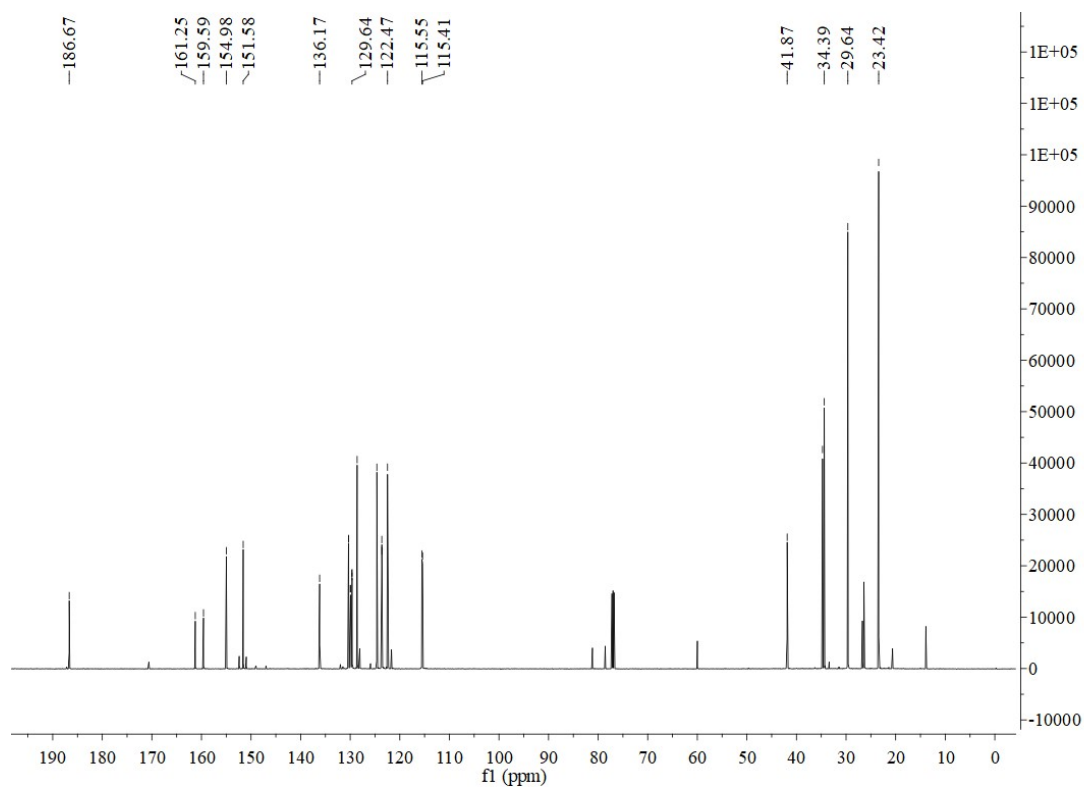

**Figure 3.** <sup>13</sup>C NMR spectrum of compound 4a

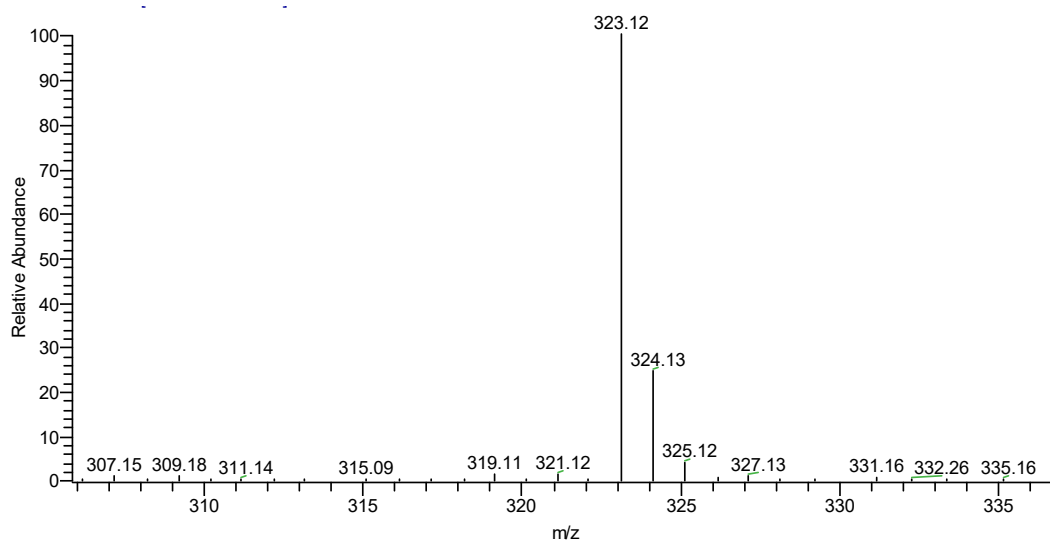

**Figure 4.** MS spectrum of compound 4a

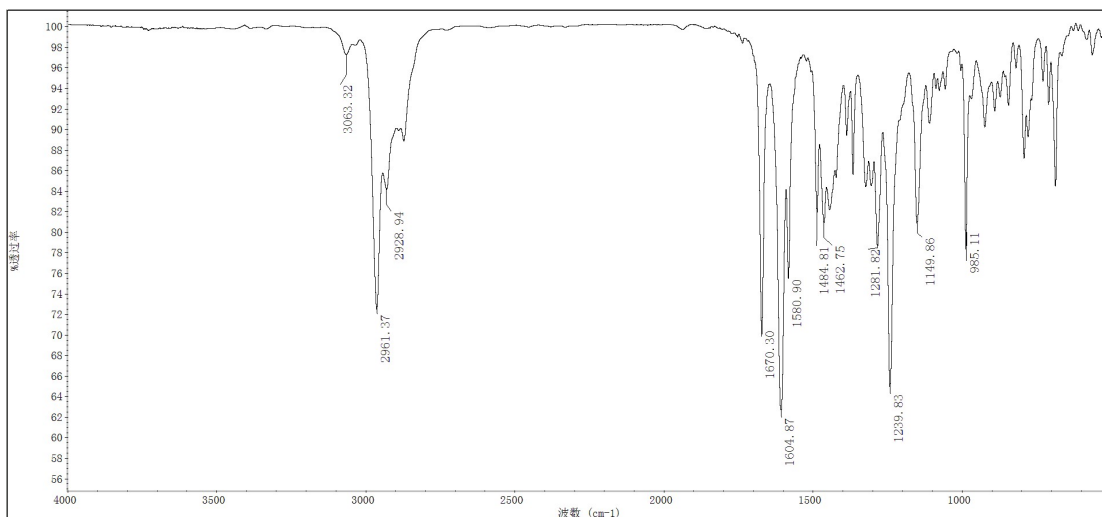

Figure 5. IR spectrum of compound 4b

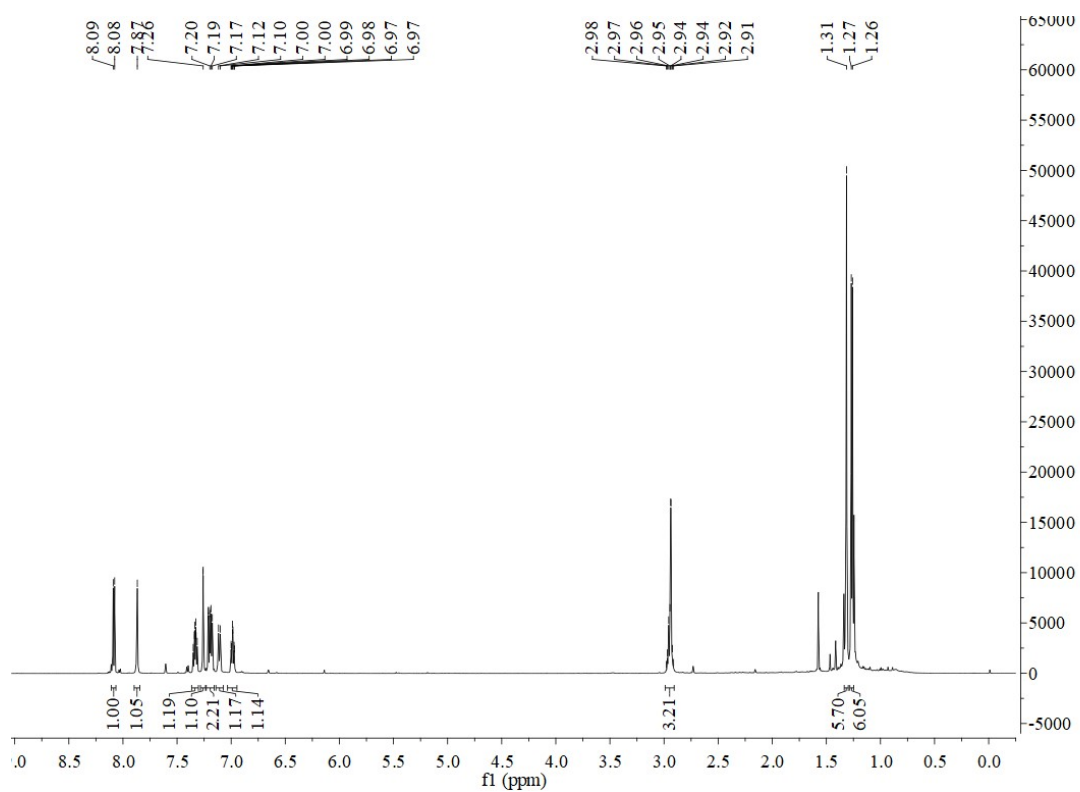

Figure 6. <sup>1</sup>H NMR spectrum of compound 4b

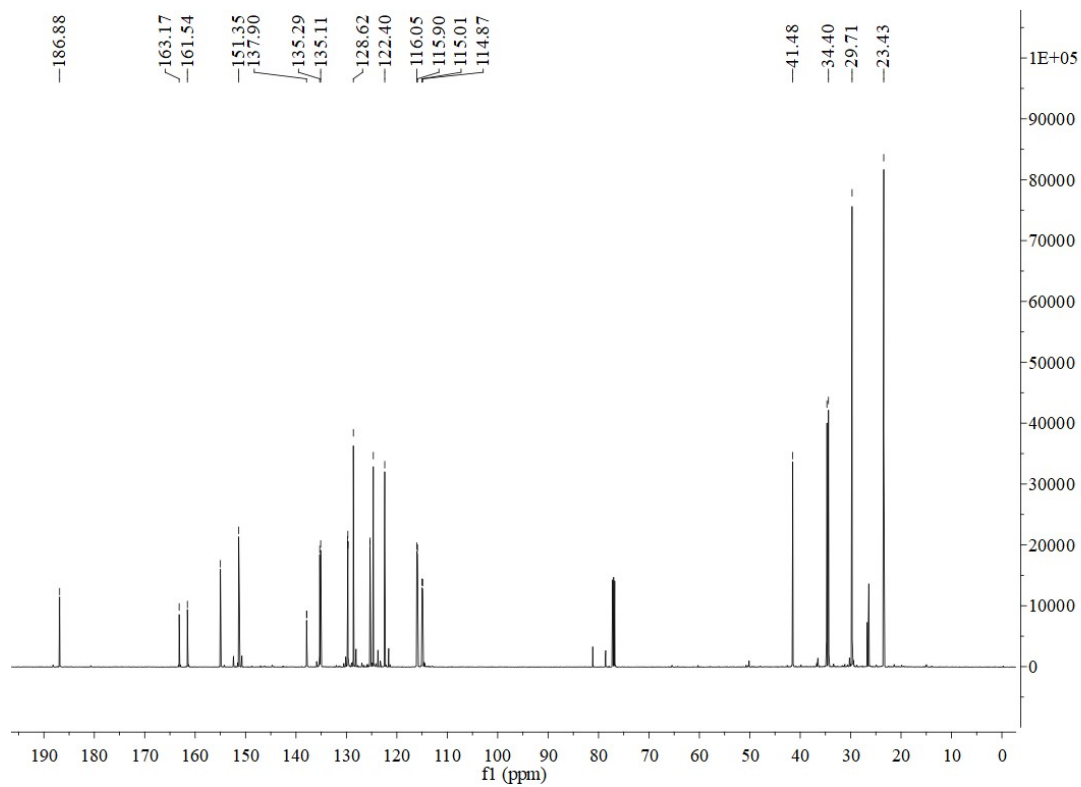

**Figure 7.** <sup>13</sup>C NMR spectrum of compound 4b

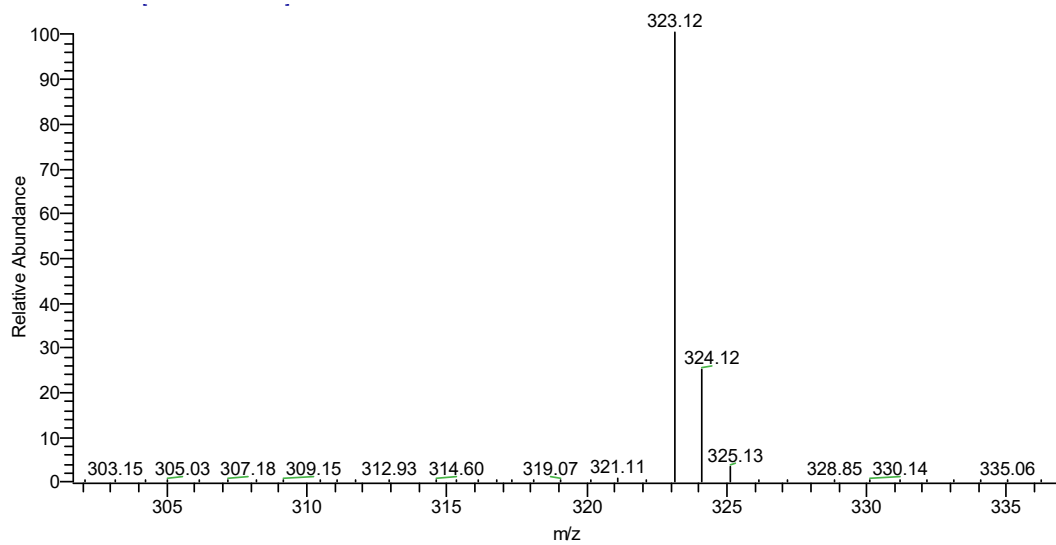

**Figure 8.** MS spectrum of compound 4b

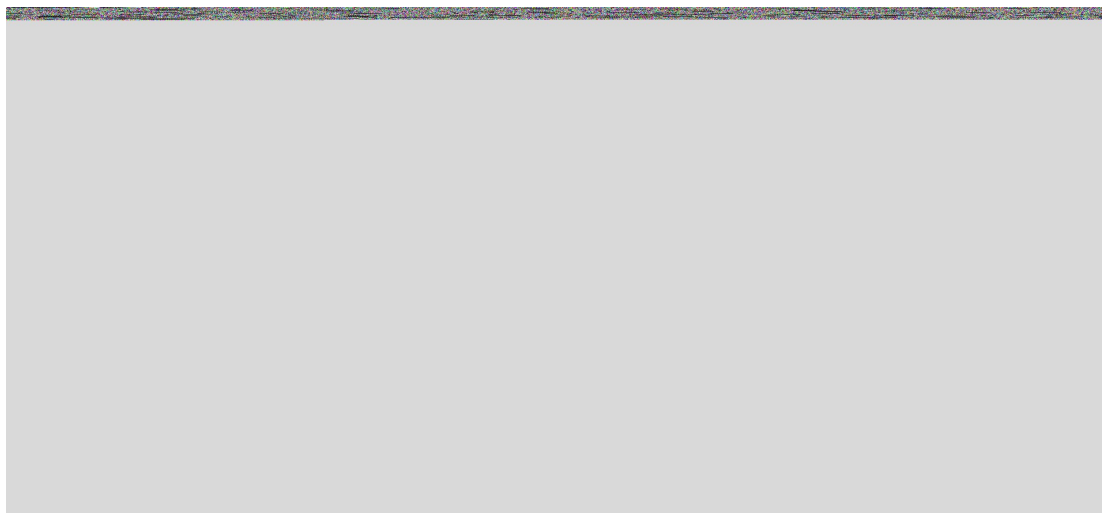

Figure 9. IR spectrum of compound 4c

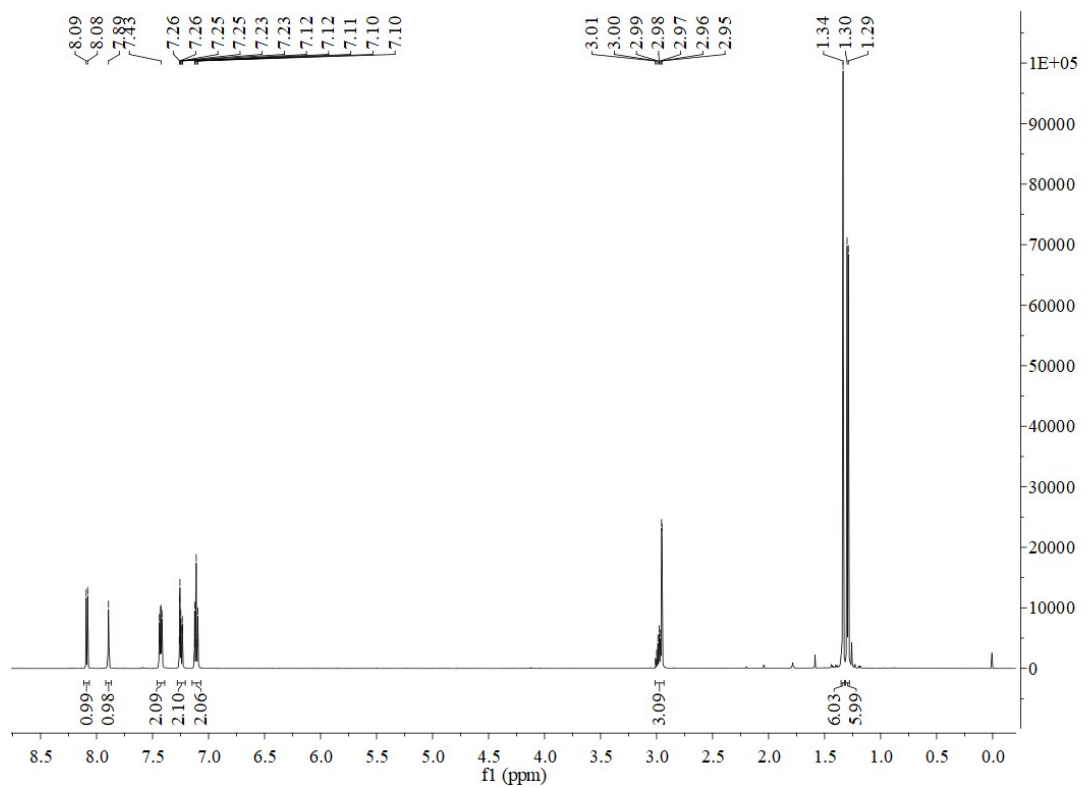

Figure 10.  $^1\text{H}$  NMR spectrum of compound 4c

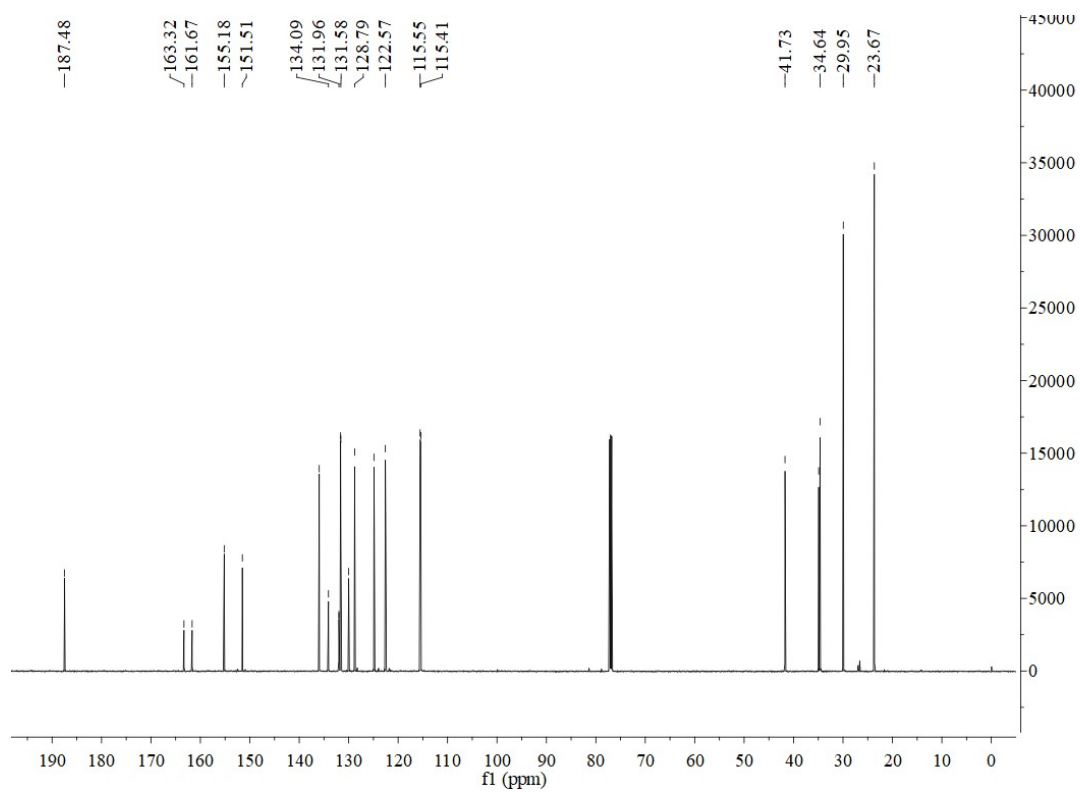

**Figure 11.**  $^{13}\text{C}$  NMR spectrum of compound **4c**

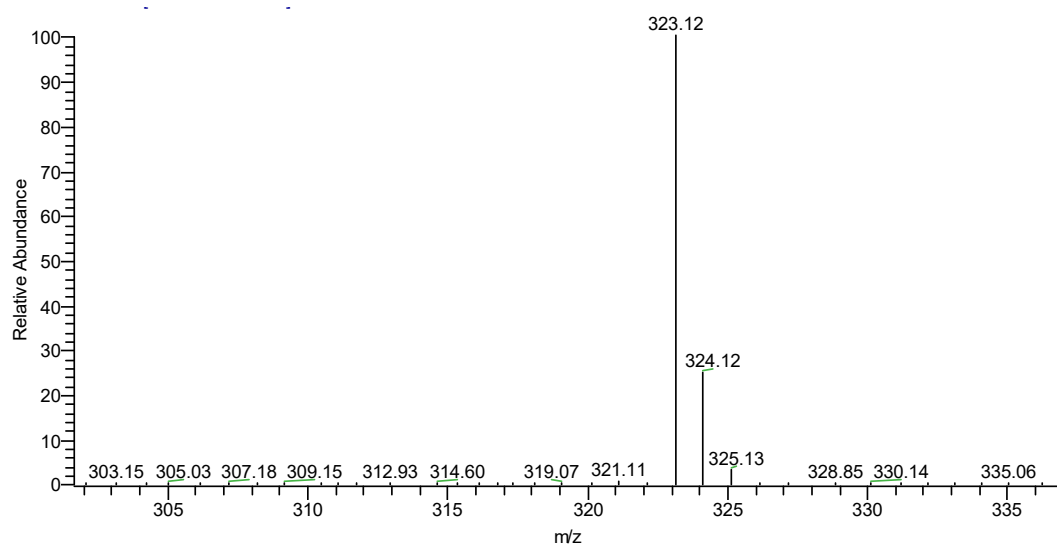

**Figure 12.** MS spectrum of compound **4c**

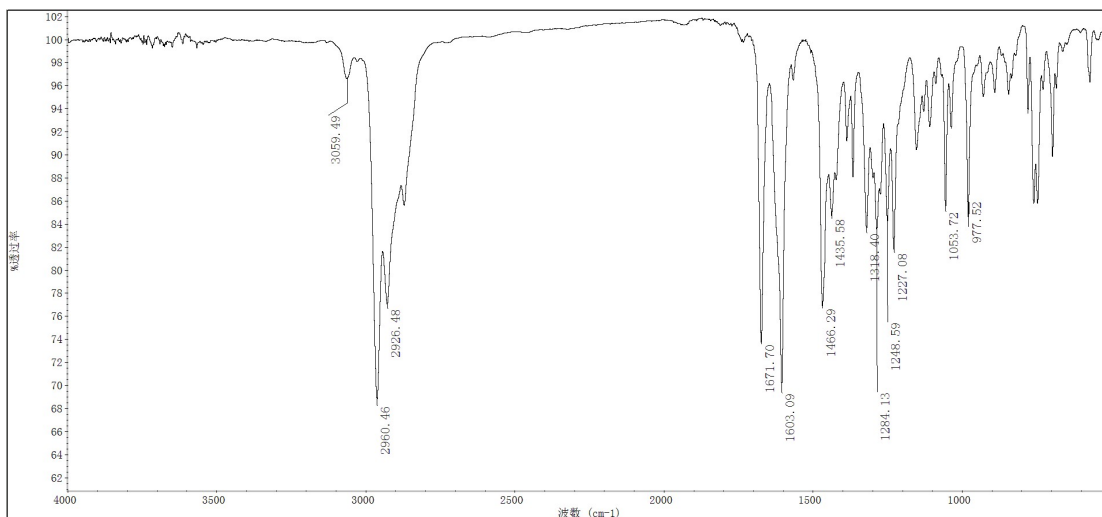

Figure 13. IR spectrum of compound 4d

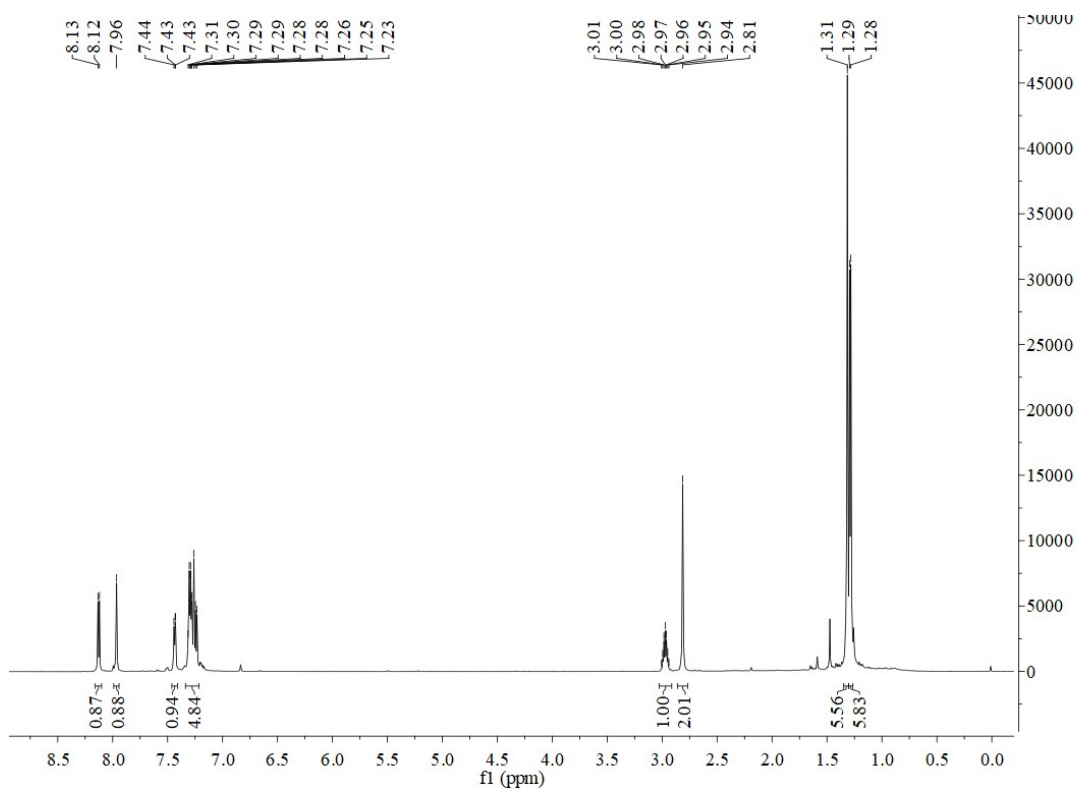

Figure 14. <sup>1</sup>H NMR spectrum of compound 4d

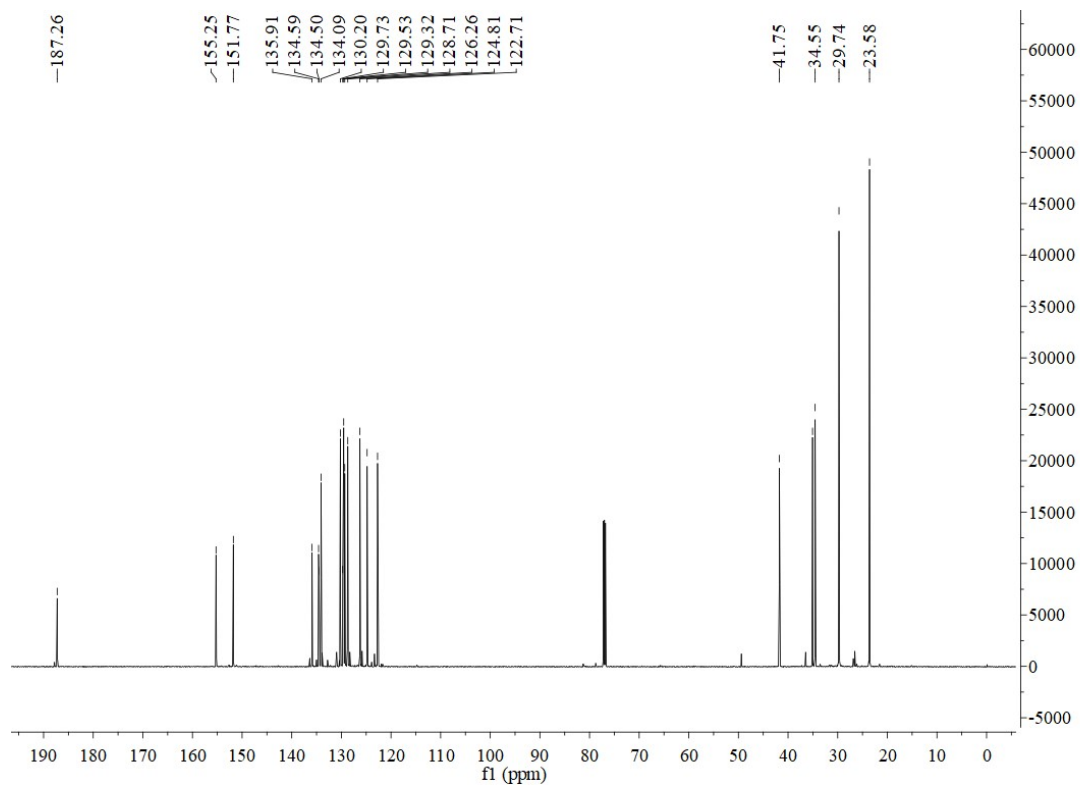

**Figure 15.**  $^{13}\text{C}$  NMR spectrum of compound **4d**

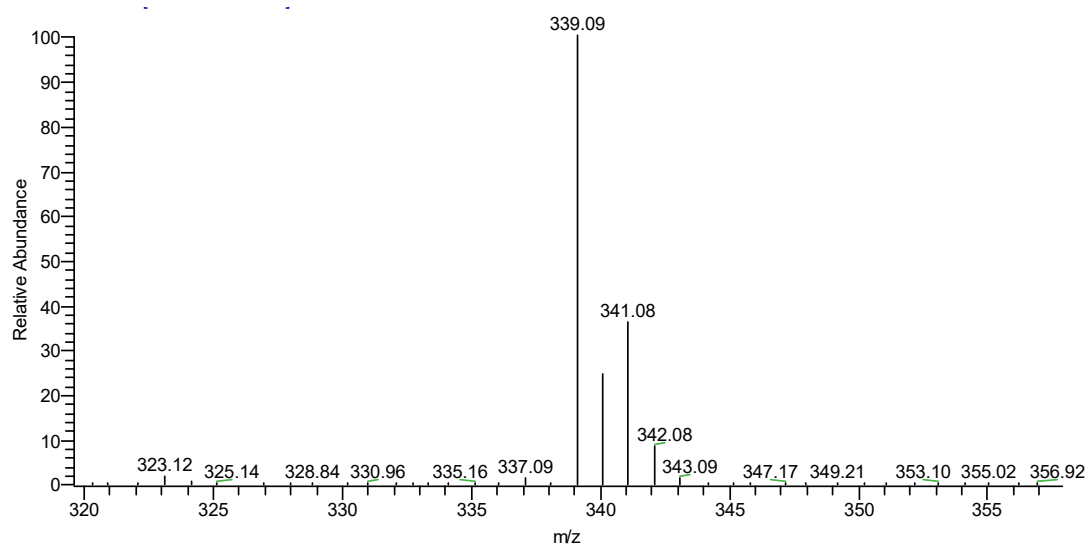

**Figure 16.** MS spectrum of compound **4d**

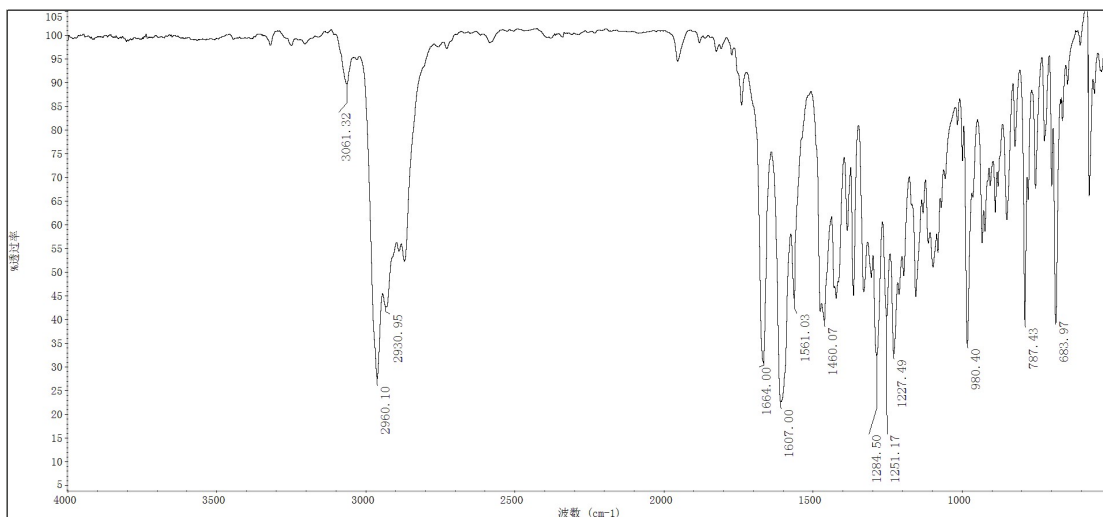

Figure 17. IR spectrum of compound 4e

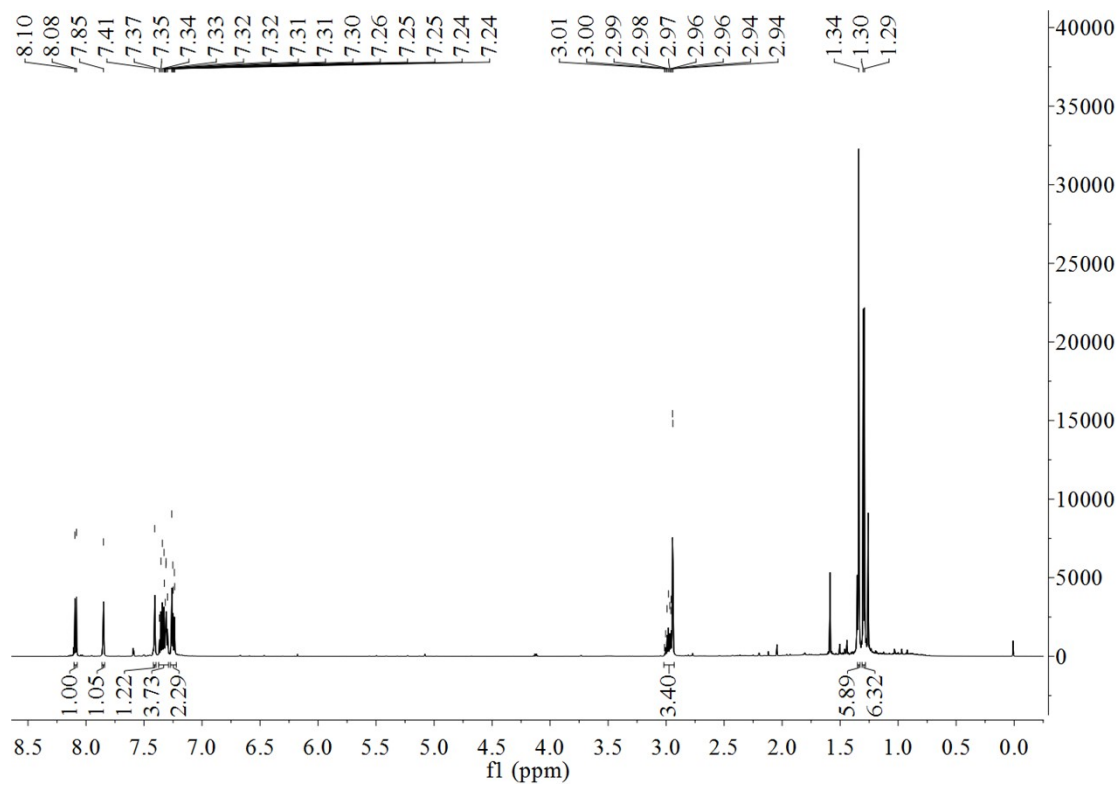

Figure 18. <sup>1</sup>H NMR spectrum of compound 4e



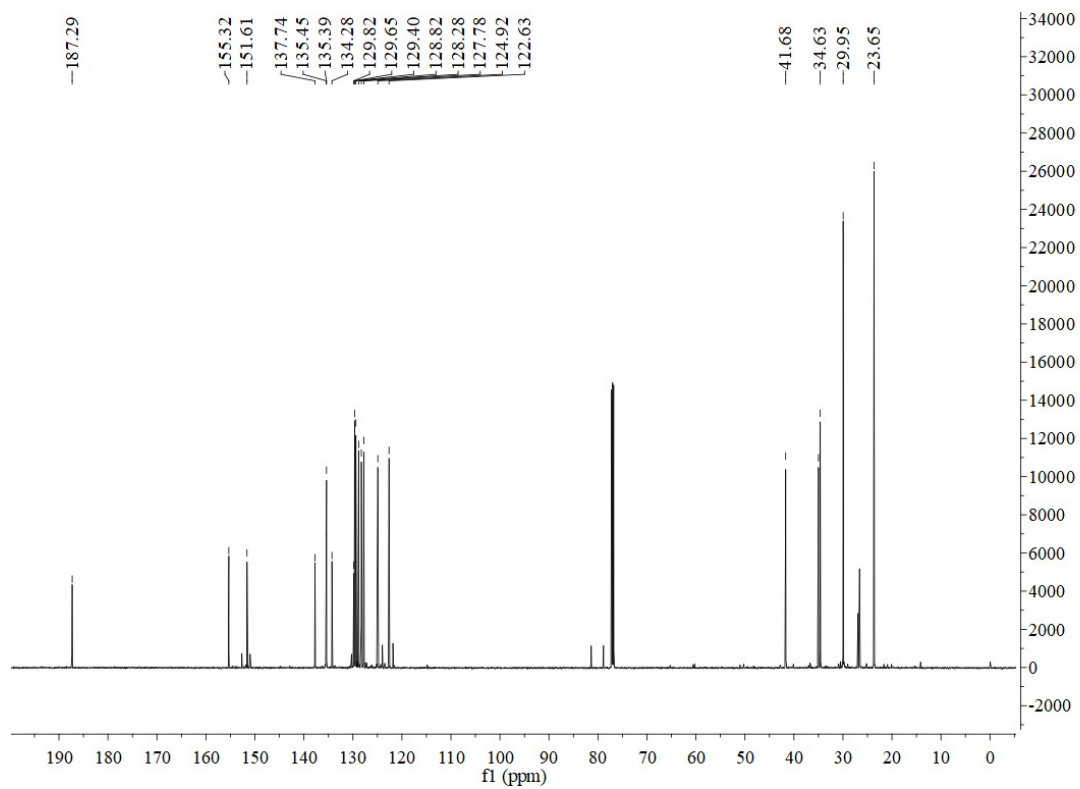

**Figure 19.** <sup>13</sup>C NMR spectrum of compound **4e**

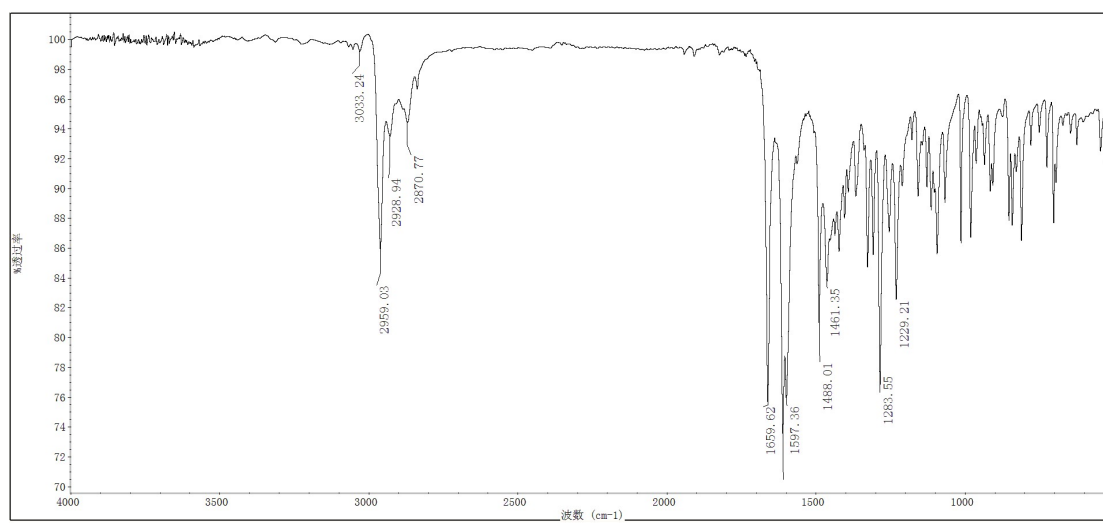

**Figure 20.** IR spectrum of compound **4f**

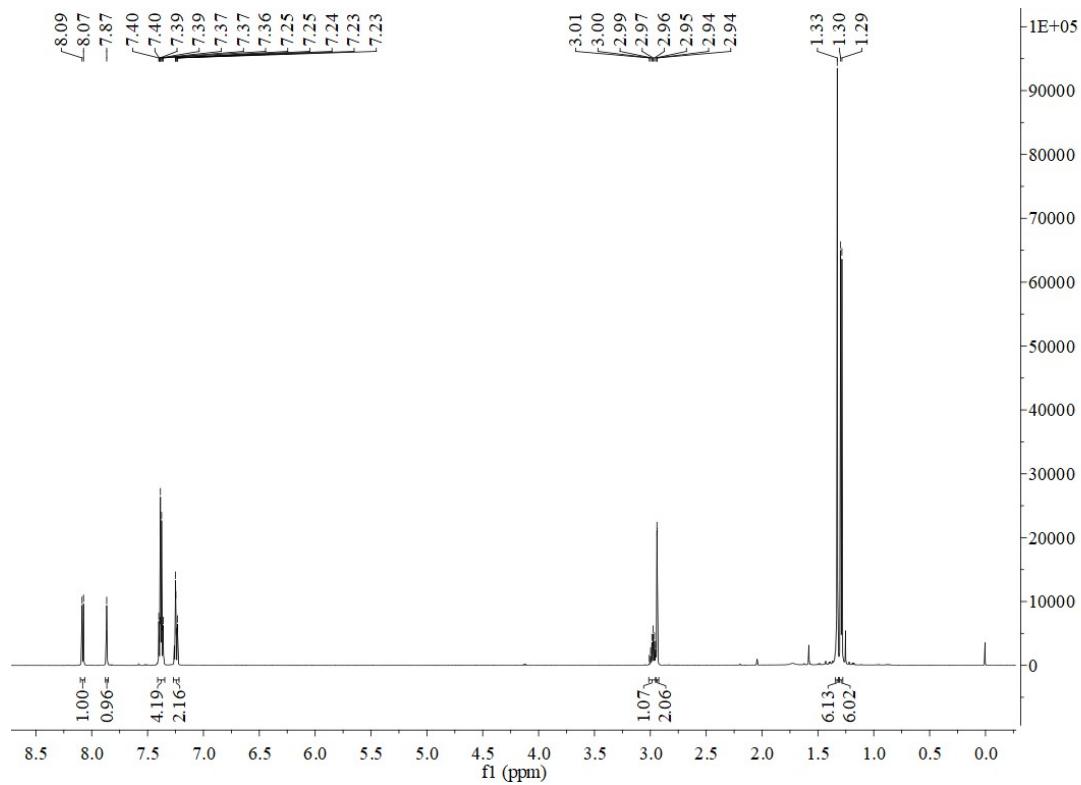

**Figure 21.**  $^1\text{H}$  NMR spectrum of compound **4f**

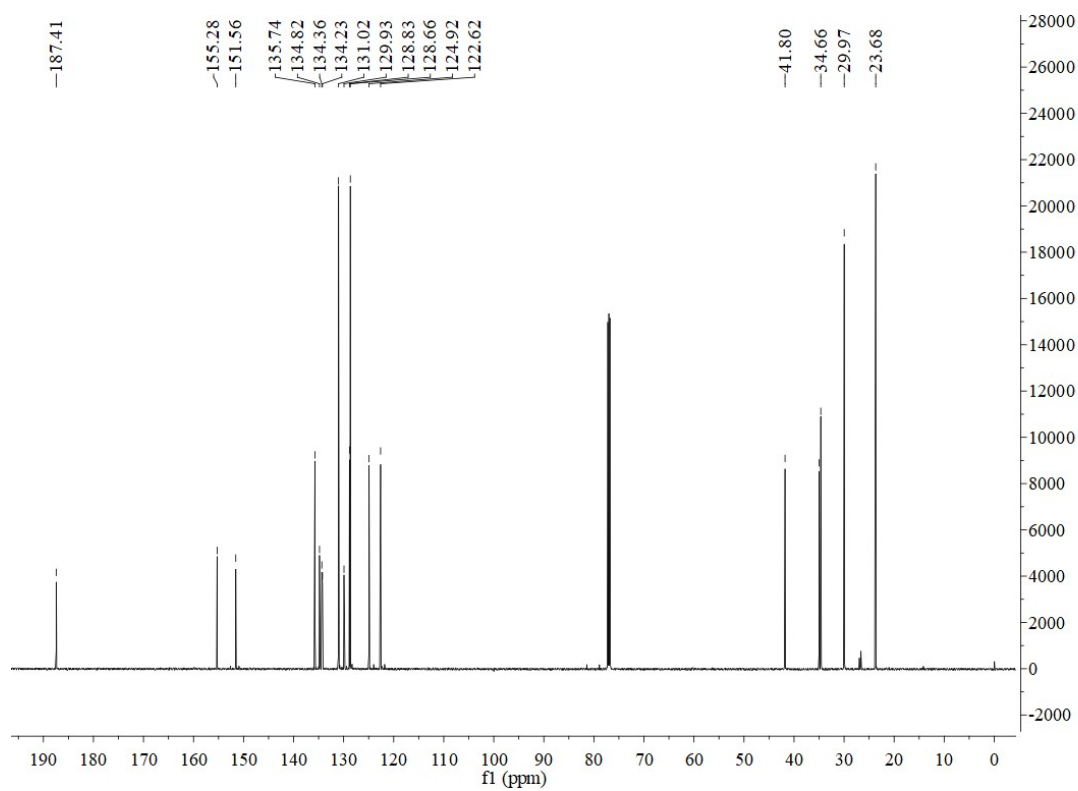

**Figure 22.**  $^{13}\text{C}$  NMR spectrum of compound **4f**

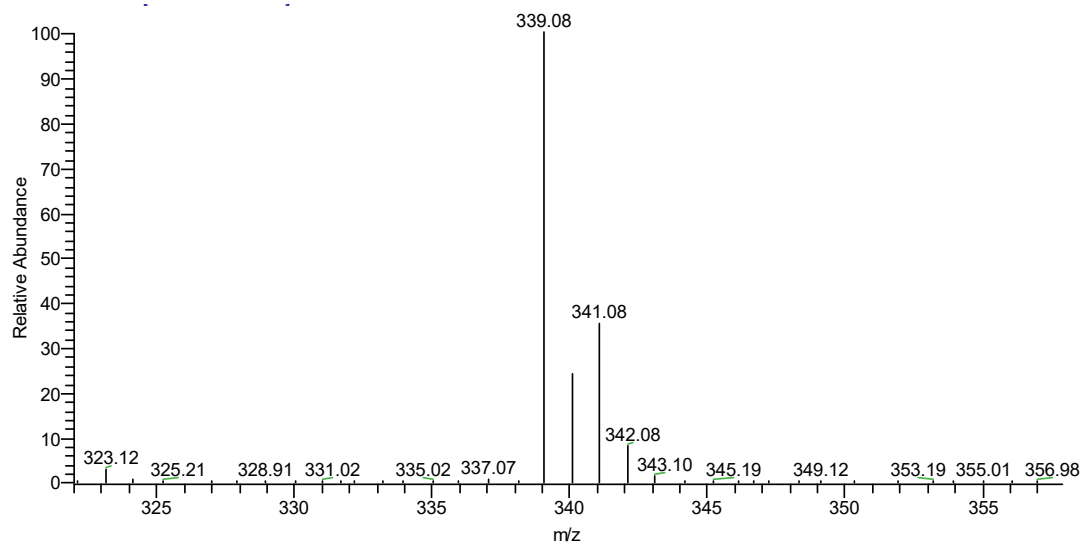

**Figure 23.** MS spectrum of compound 4f

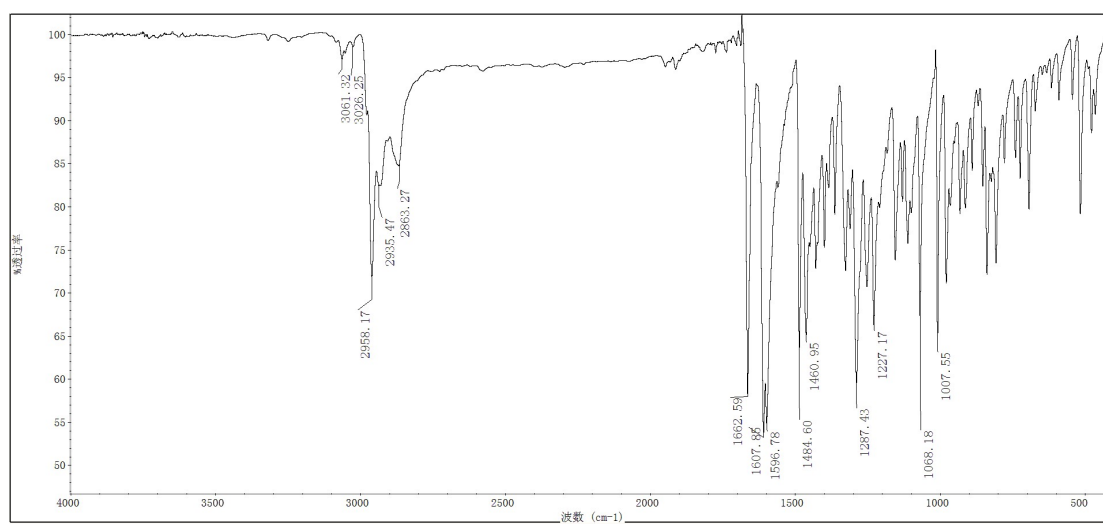

**Figure 24.** IR spectrum of compound 4i

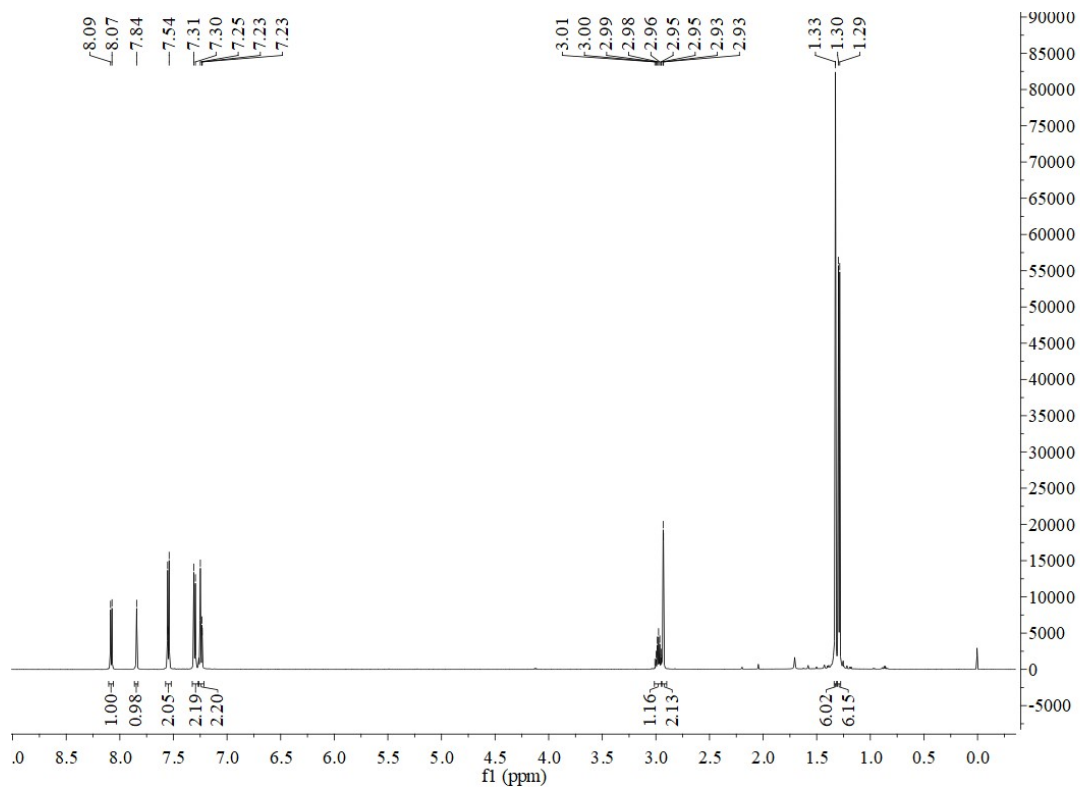

**Figure 25.**  $^1\text{H}$  NMR spectrum of compound **4i**

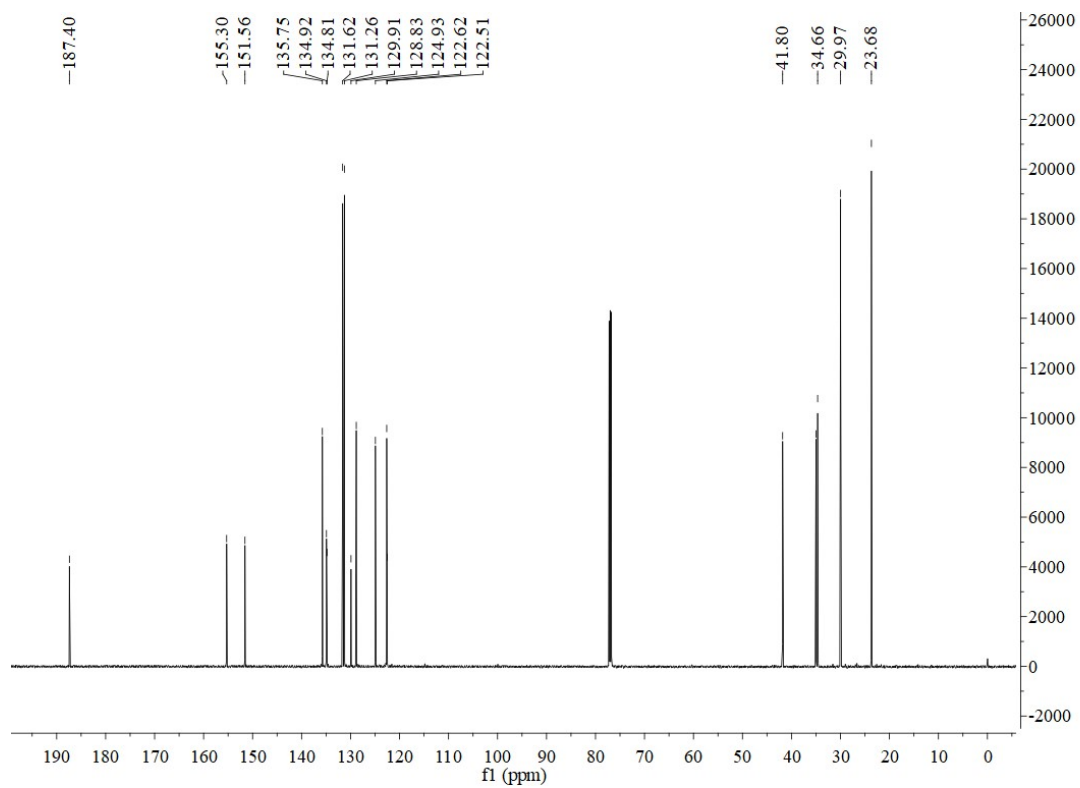

**Figure 26.**  $^{13}\text{C}$  NMR spectrum of compound **4i**

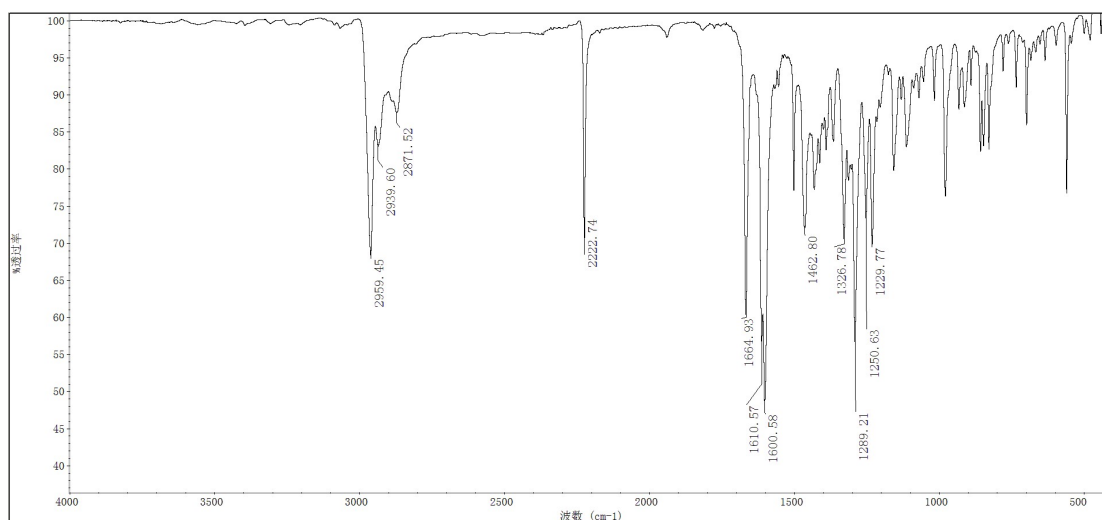

Figure 27. IR spectrum of compound 4k

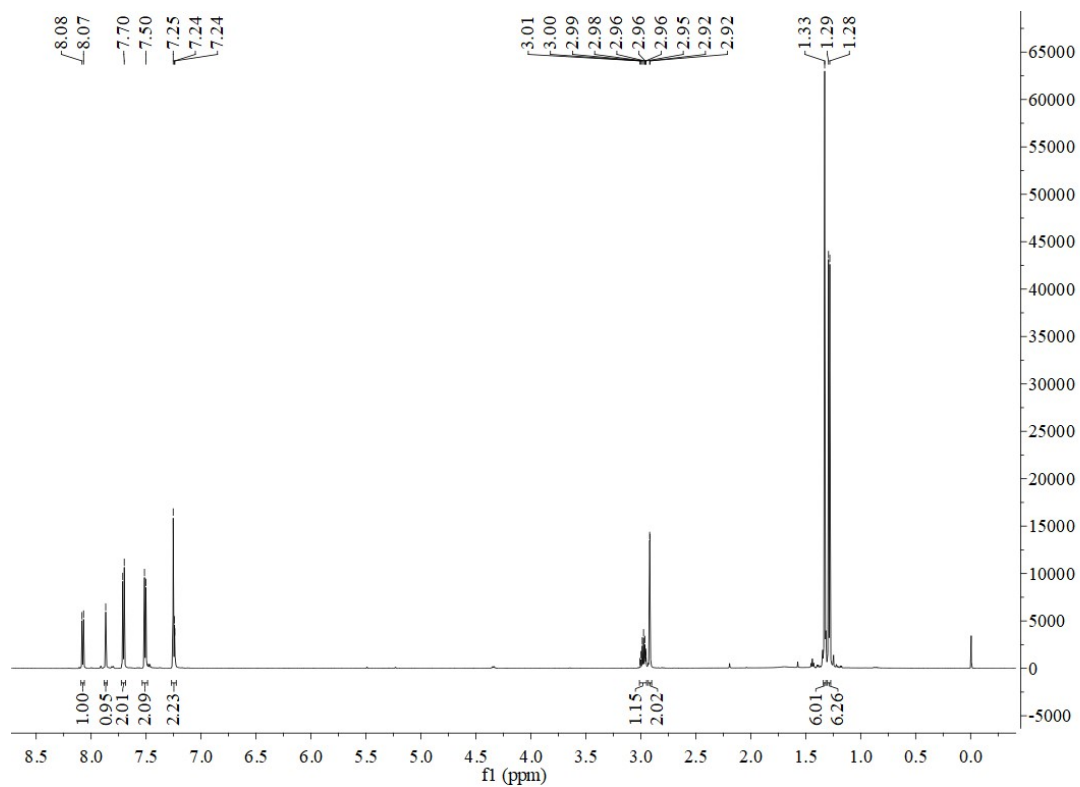

Figure 28. <sup>1</sup>H NMR spectrum of compound 4k

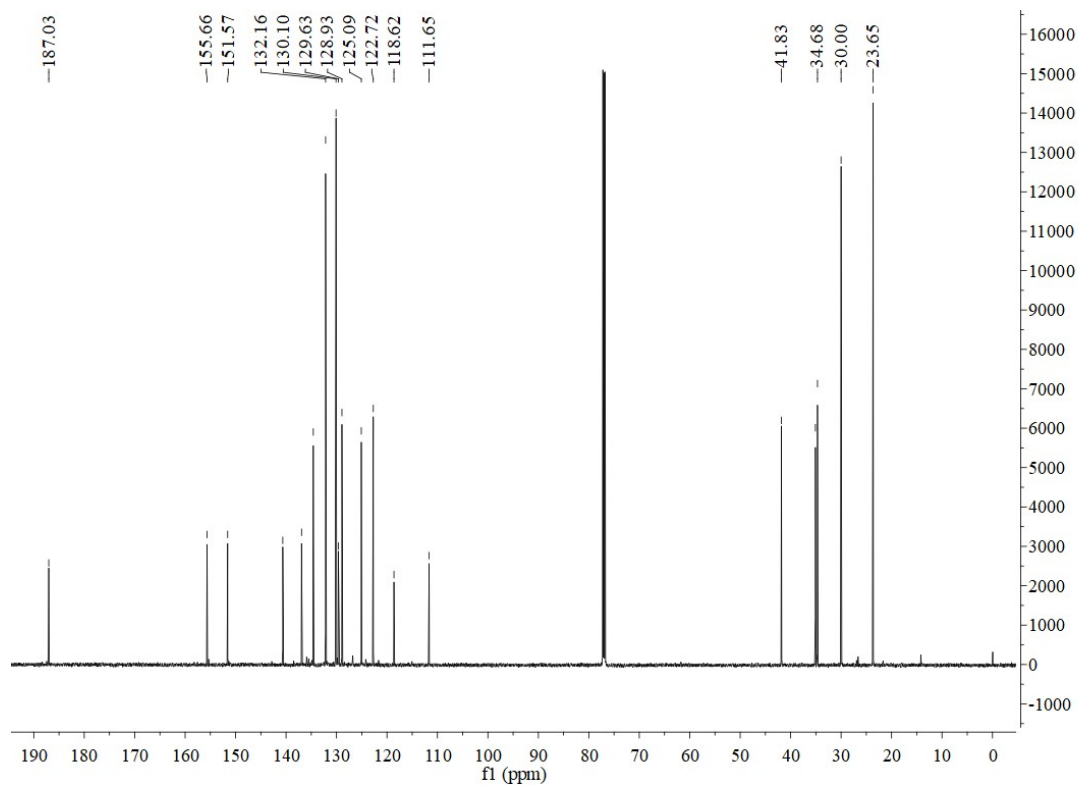

Figure 29.  $^{13}\text{C}$  NMR spectrum of compound **4k**

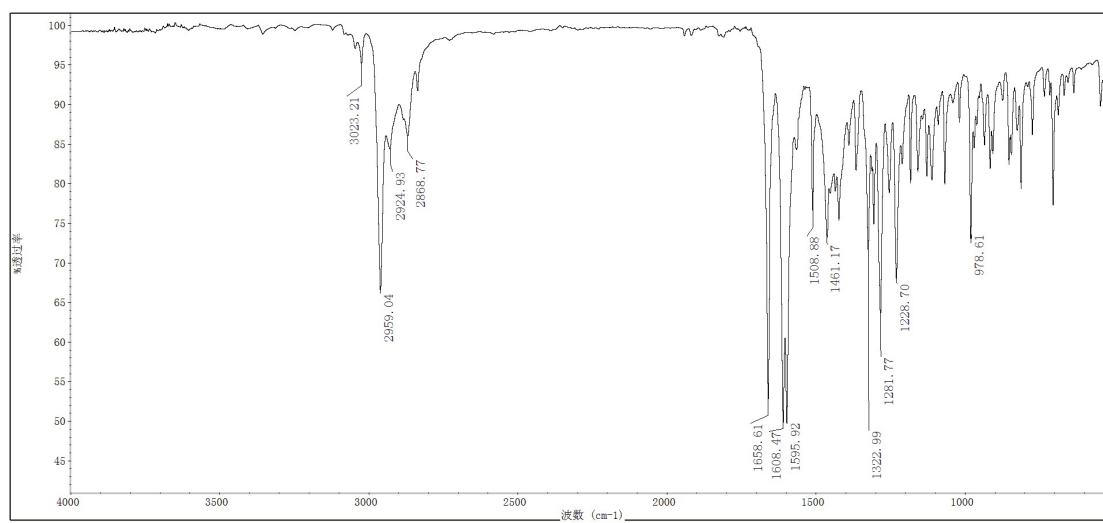

Figure 30. IR spectrum of compound **4m**

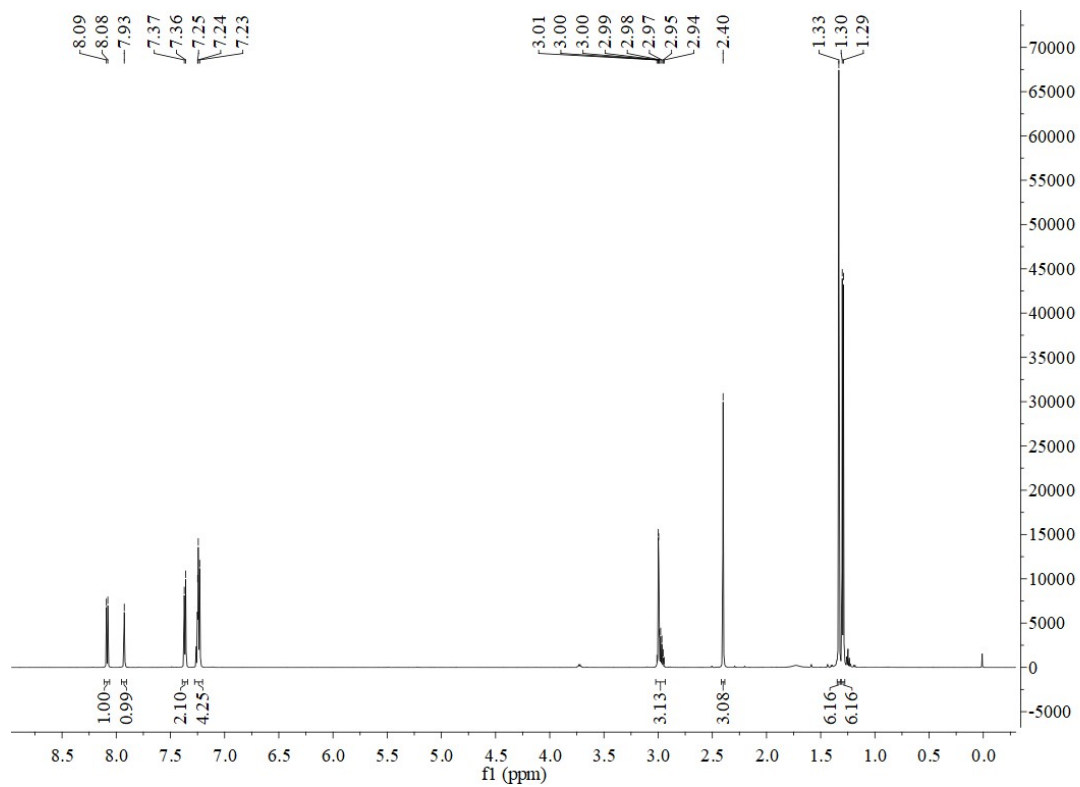

Figure 31.  $^1\text{H}$  NMR spectrum of compound 4m

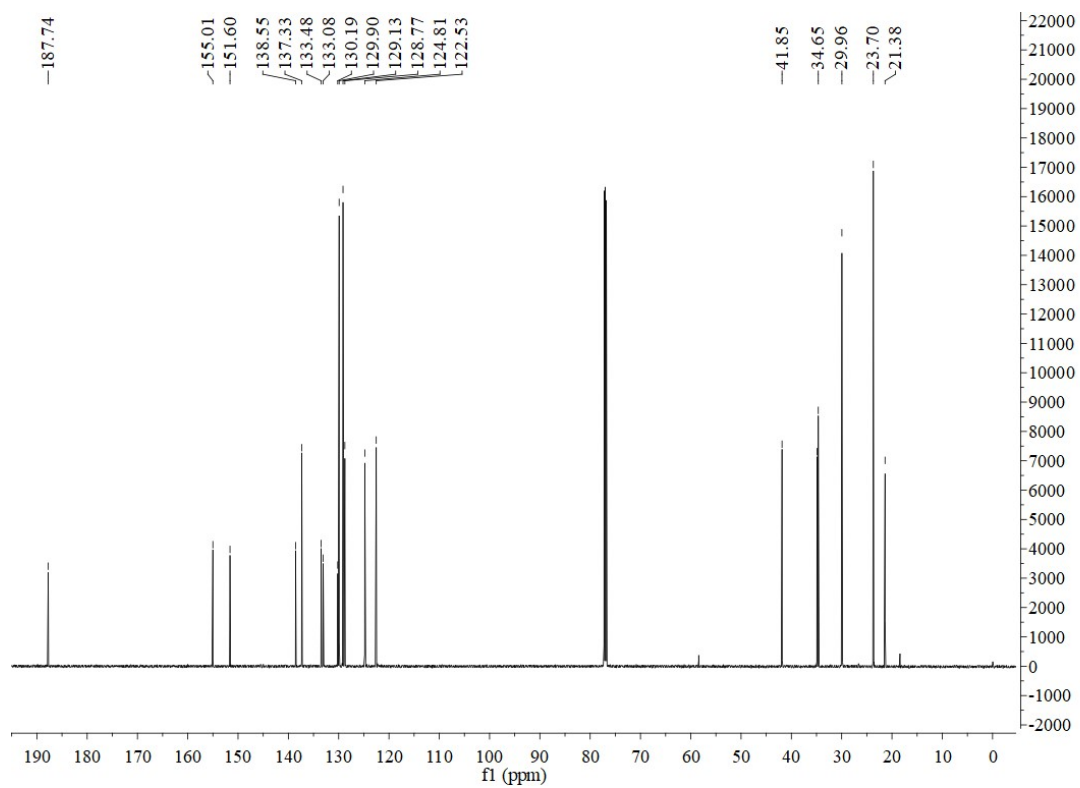

Figure 32.  $^{13}\text{C}$  NMR spectrum of compound 4m

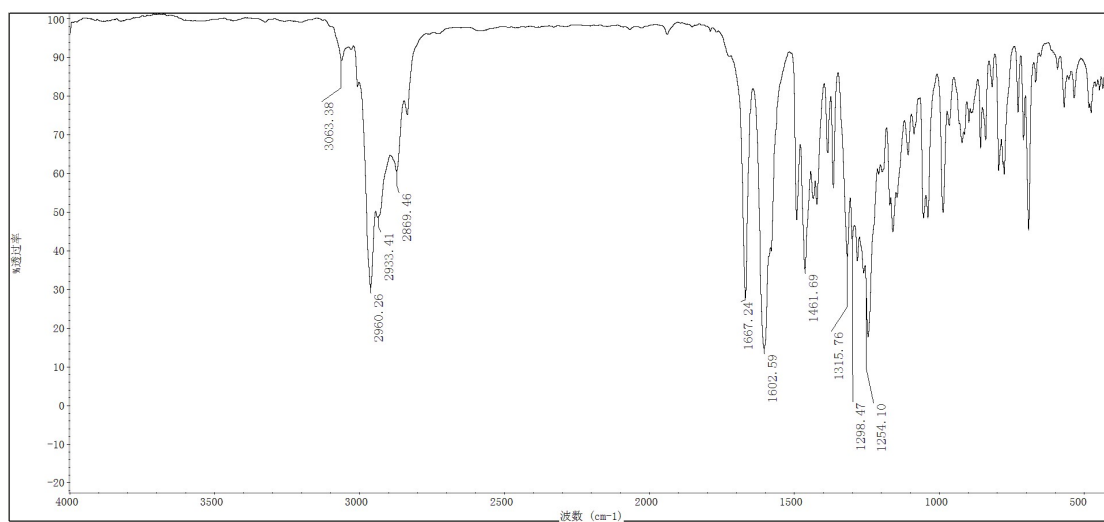

Figure 33. IR spectrum of compound 4n

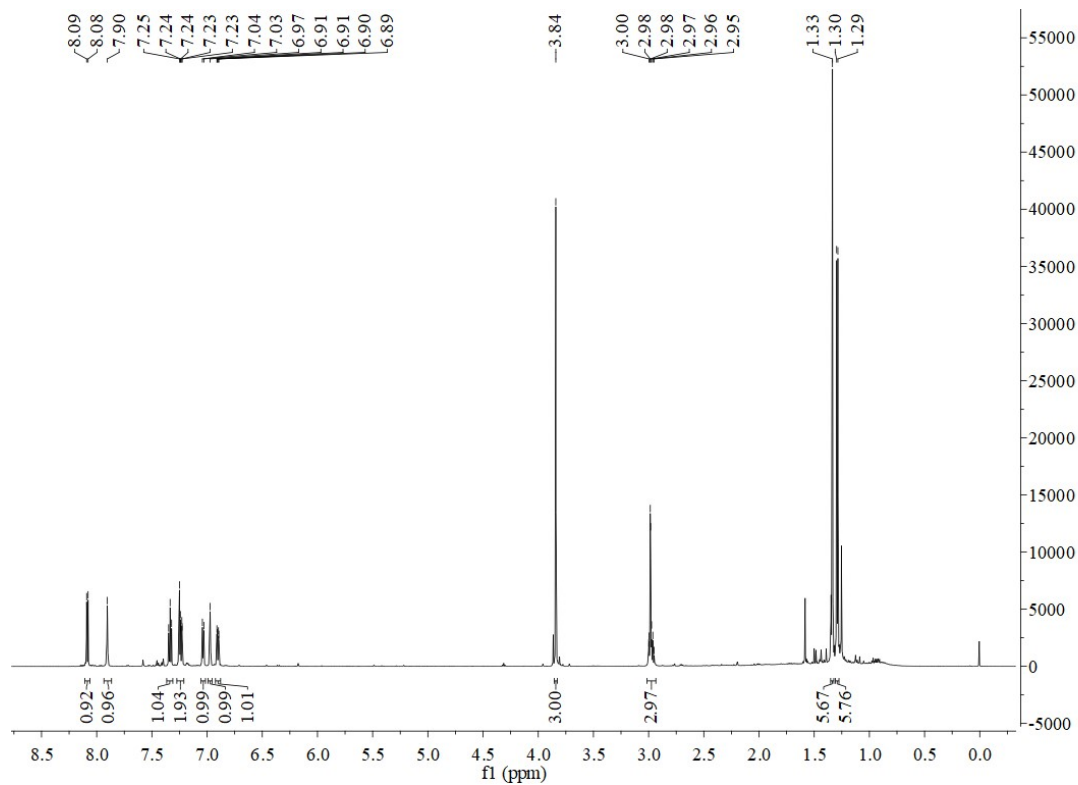

Figure 34. <sup>1</sup>H NMR spectrum of compound 4n



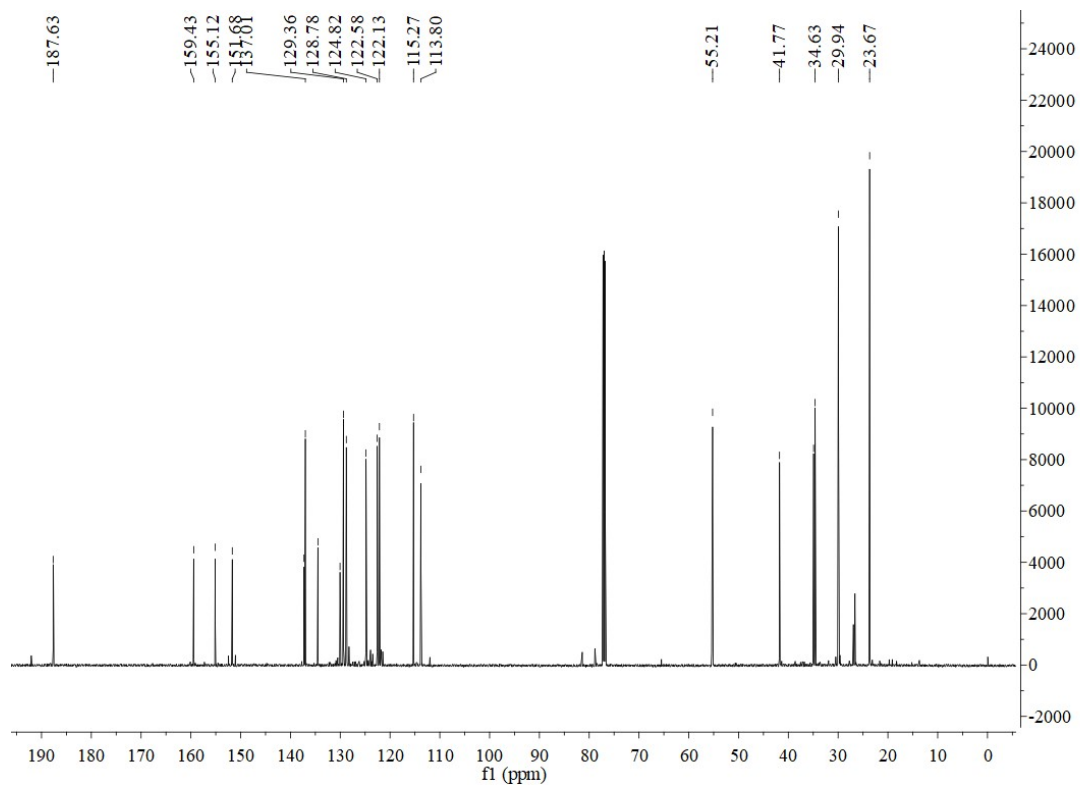

**Figure 35.**  $^{13}\text{C}$  NMR spectrum of compound **4n**

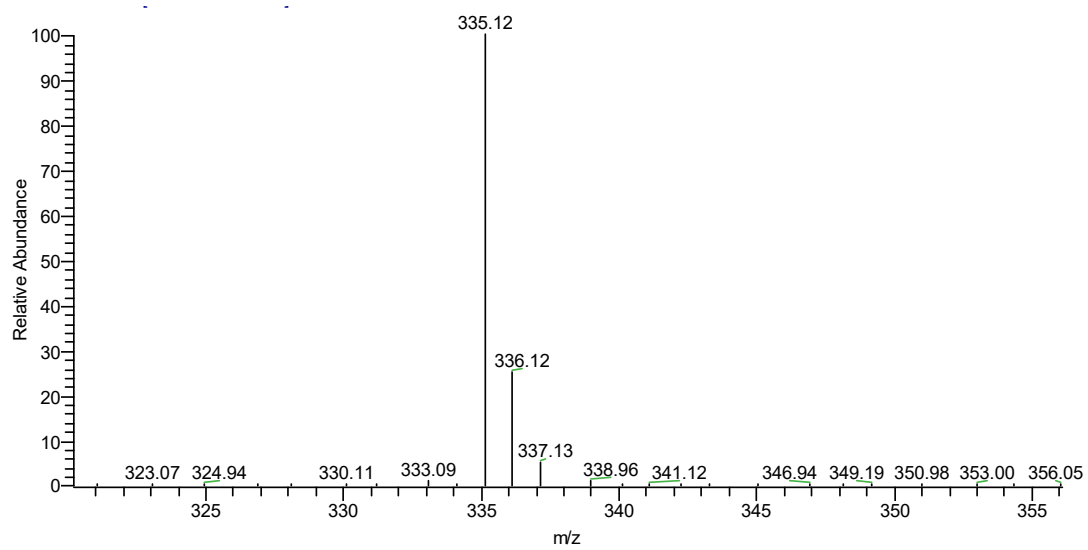

**Figure 36.** MS spectrum of compound **4n**

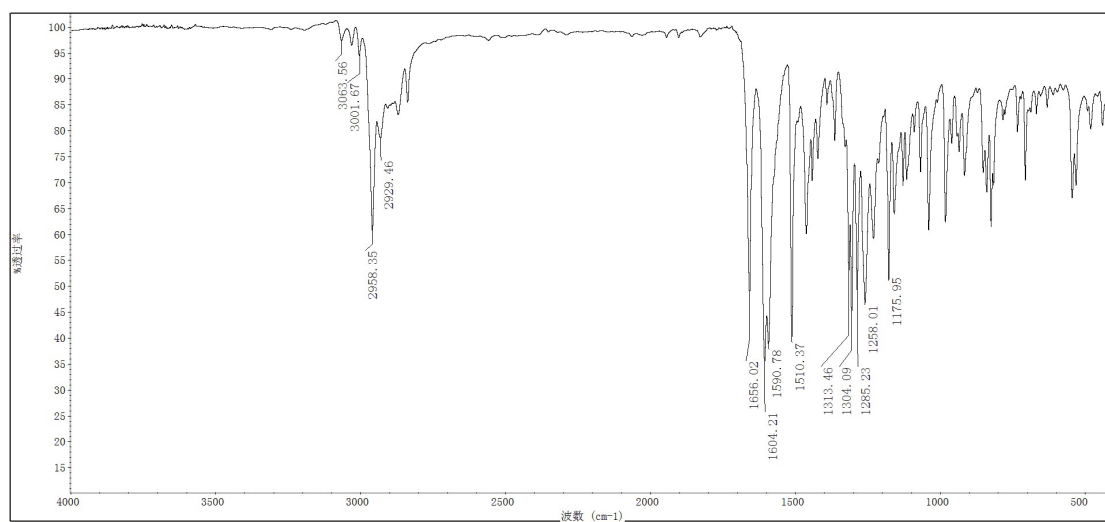

Figure 37. IR spectrum of compound 40

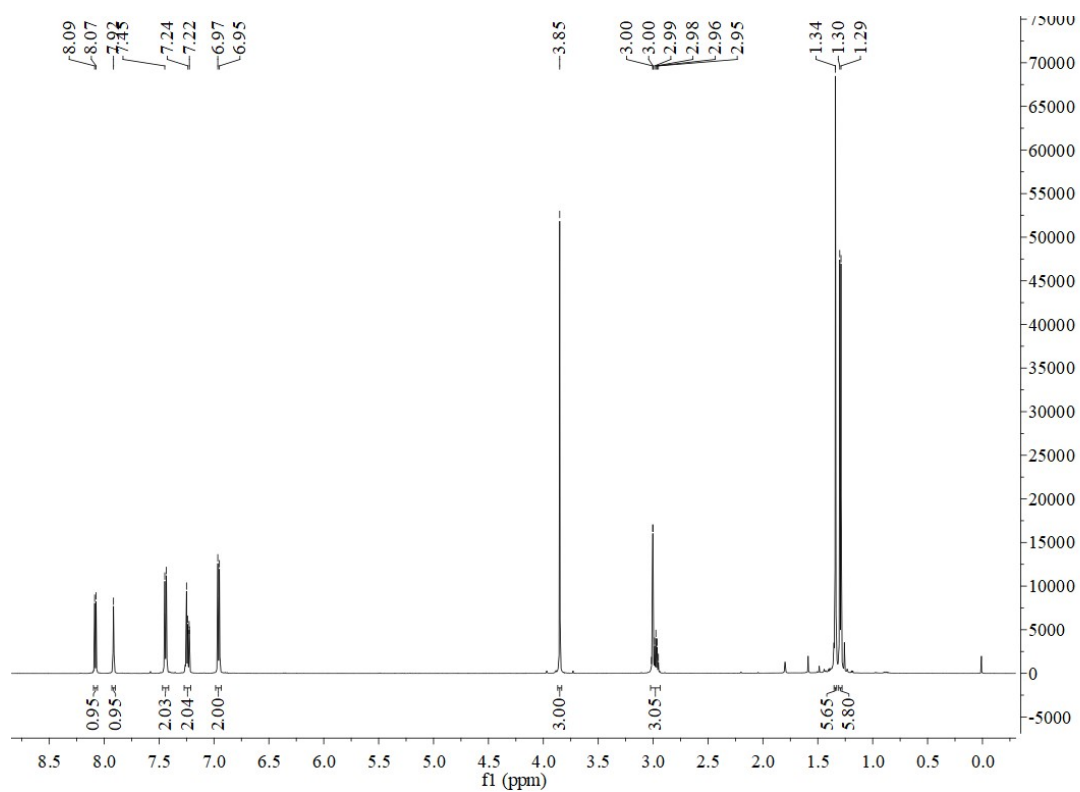

Figure 38. <sup>1</sup>H NMR spectrum of compound 40

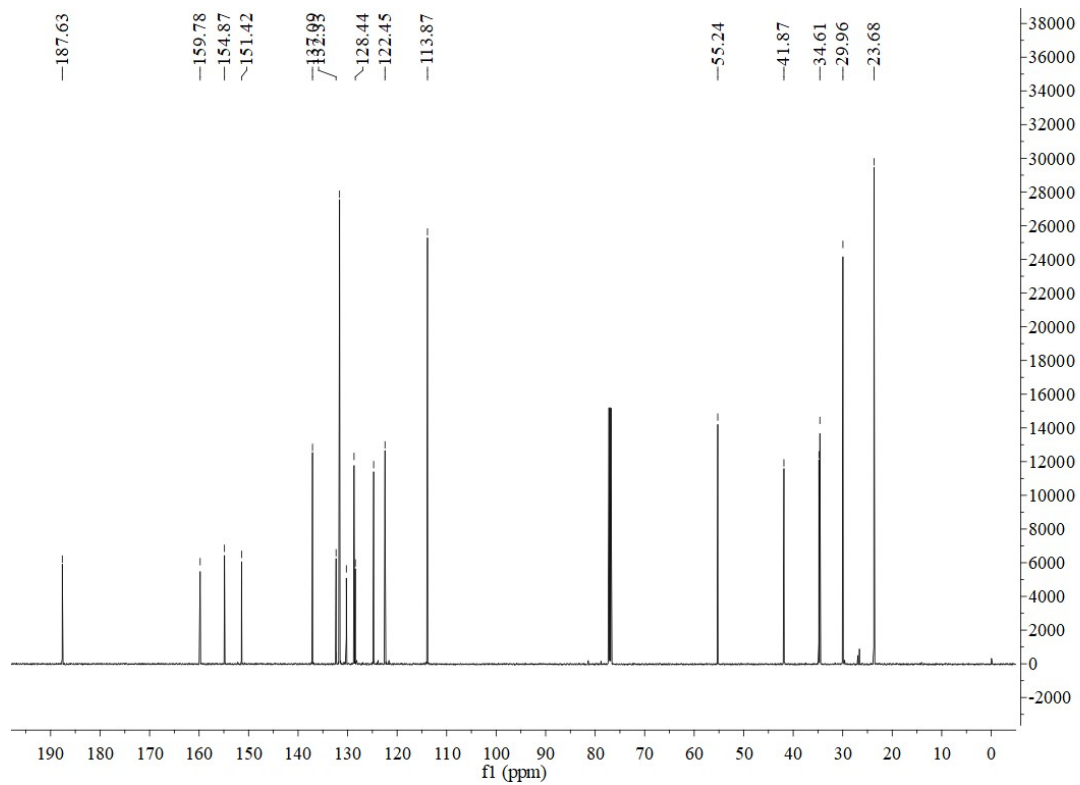

**Figure 39.**  $^{13}\text{C}$  NMR spectrum of compound **4o**

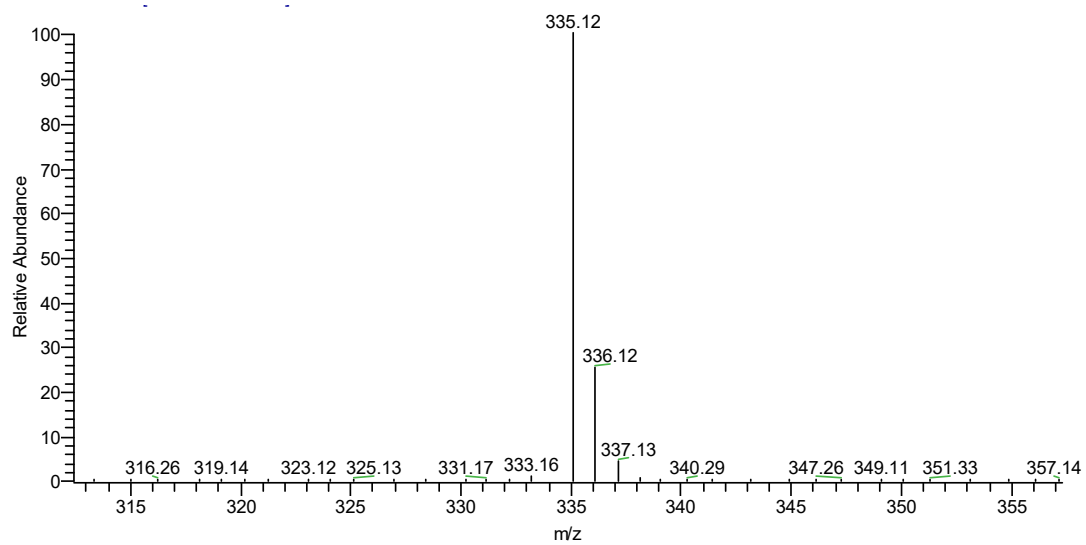

**Figure 40.** MS spectrum of compound **4o**

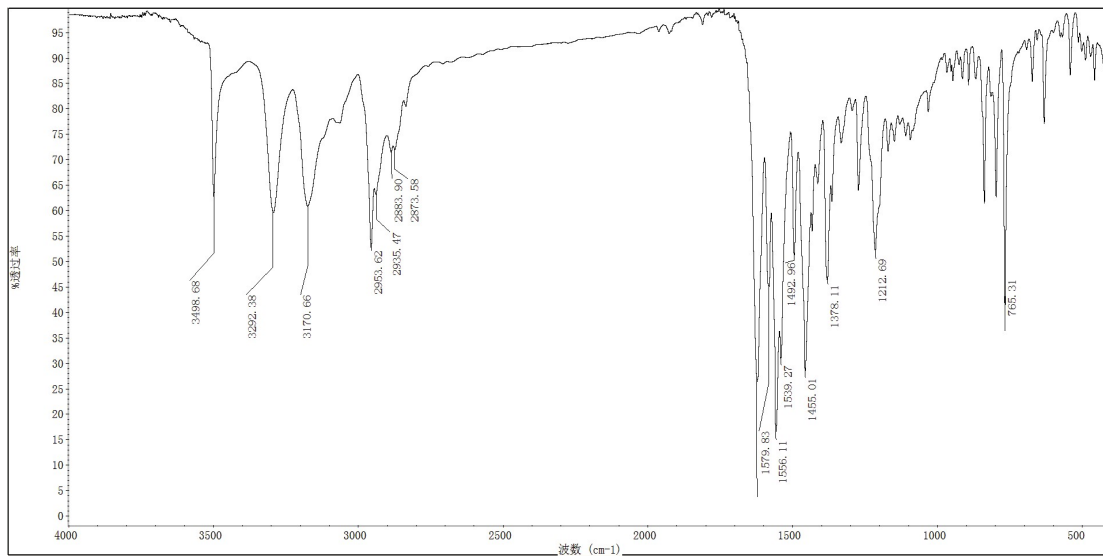

Figure 41. IR spectrum of compound 5a

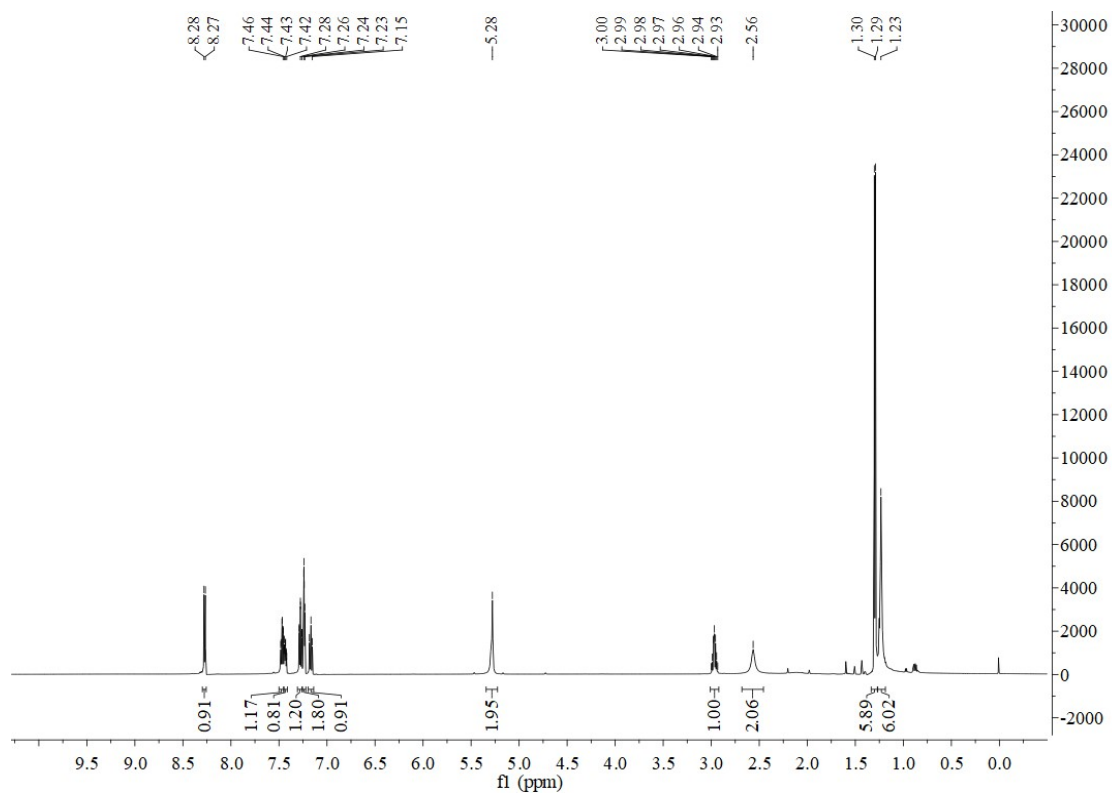

Figure 42.  $^1\text{H}$  NMR spectrum of compound 5a

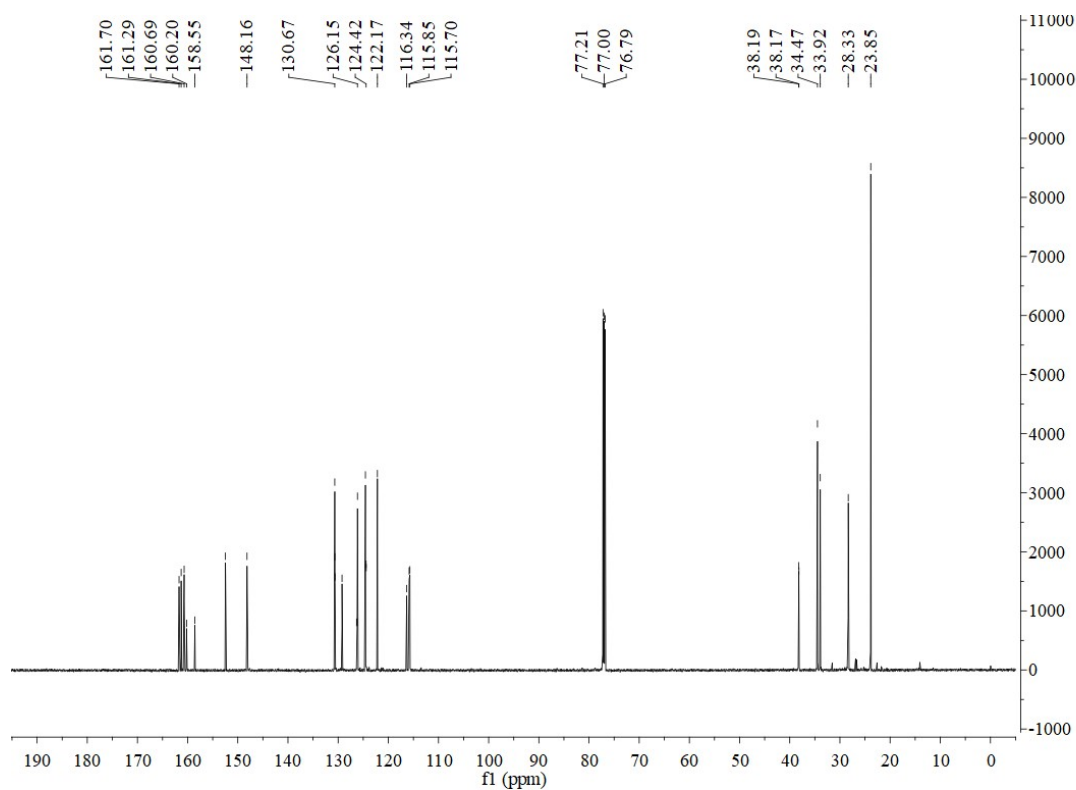

**Figure 43.**  $^{13}\text{C}$  NMR spectrum of compound **5a**

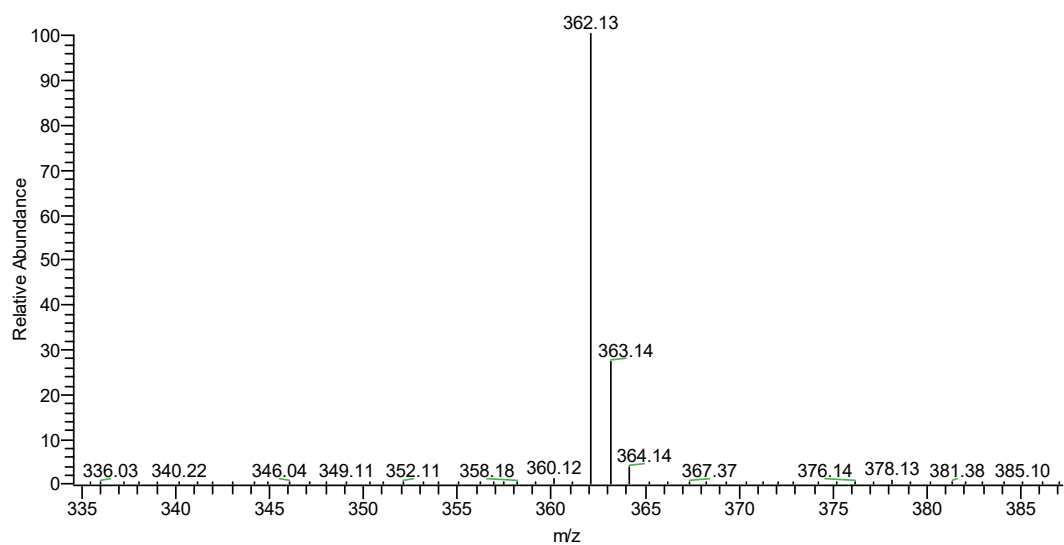

**Figure 44.** MS spectrum of compound **5a**

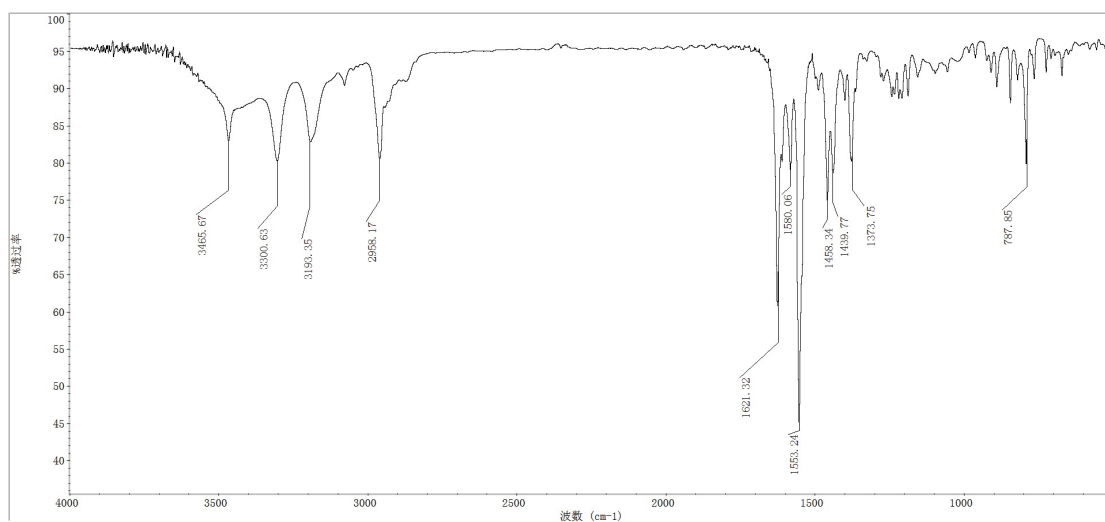

**Figure 45.** IR spectrum of compound **5b**

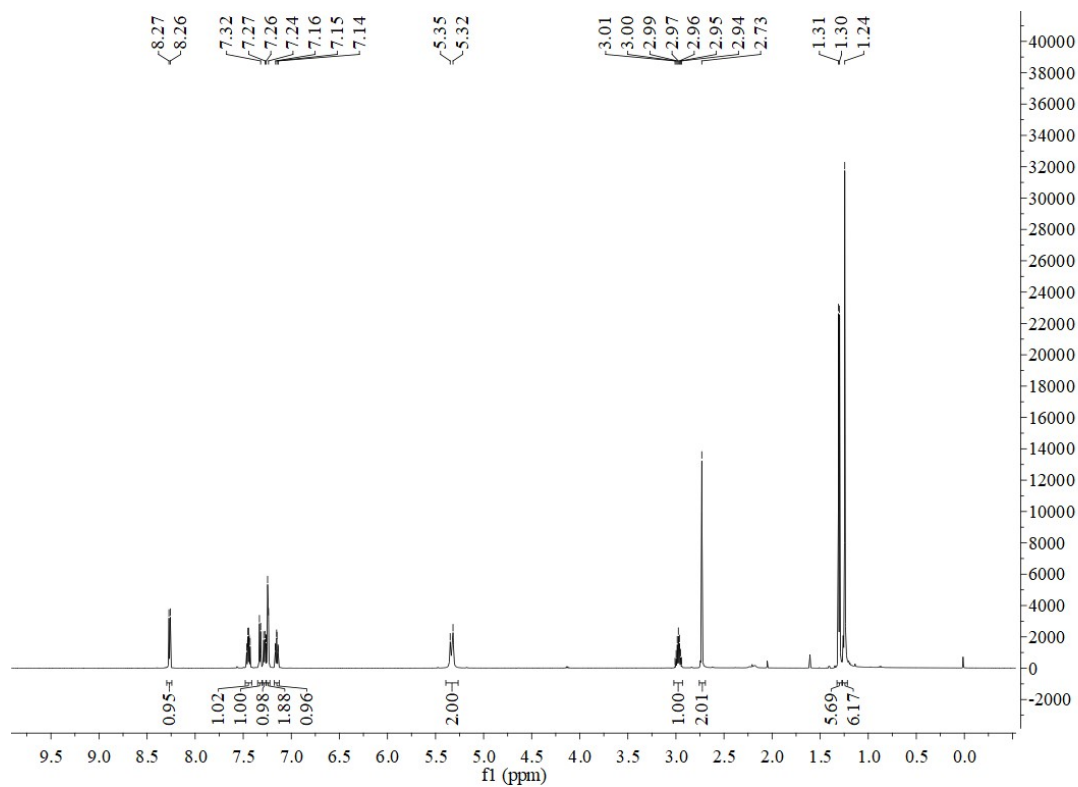

**Figure 46.** <sup>1</sup>H NMR spectrum of compound **5b**

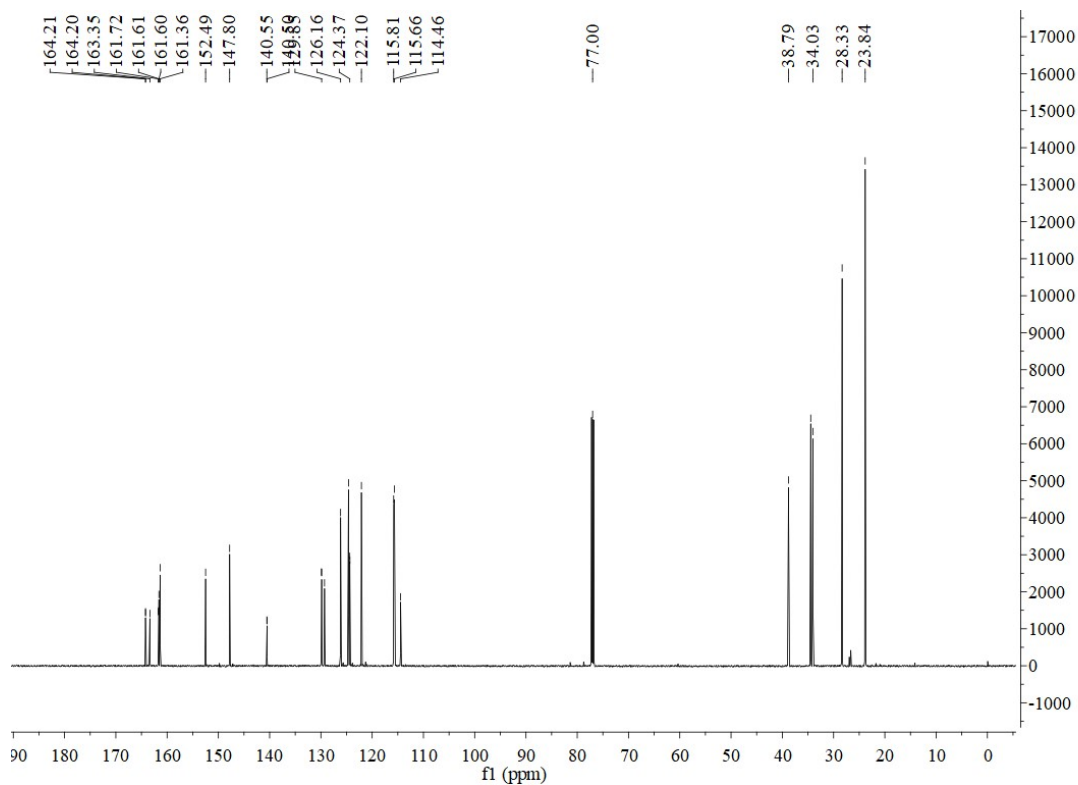

**Figure 47.**  $^{13}\text{C}$  NMR spectrum of compound **5b**

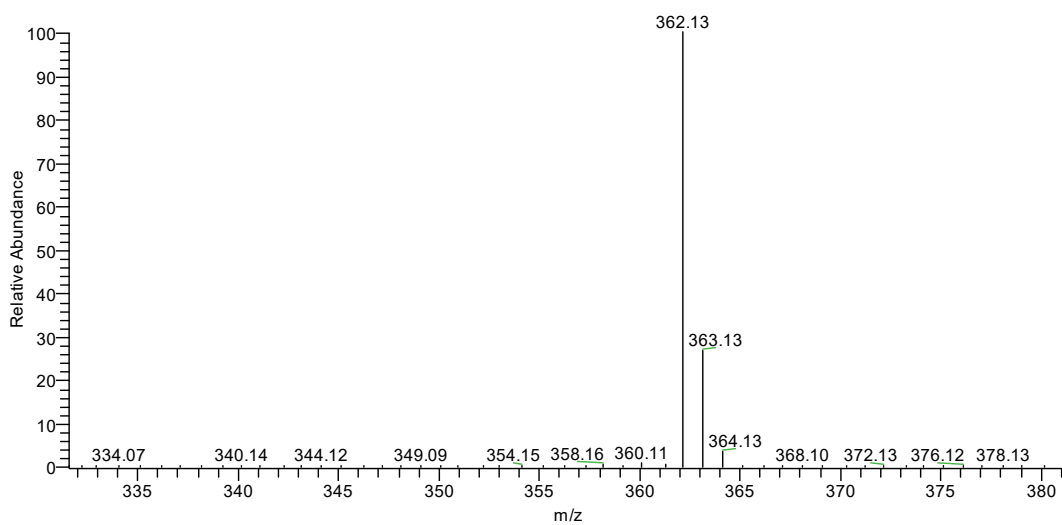

**Figure 48.** MS spectrum of compound **5b**

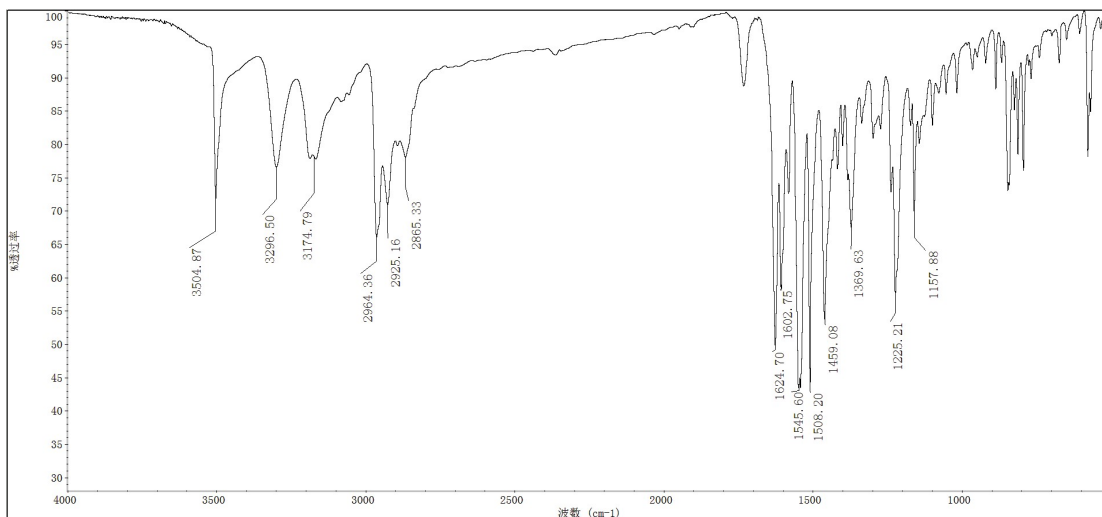

Figure 49. IR spectrum of compound 5c

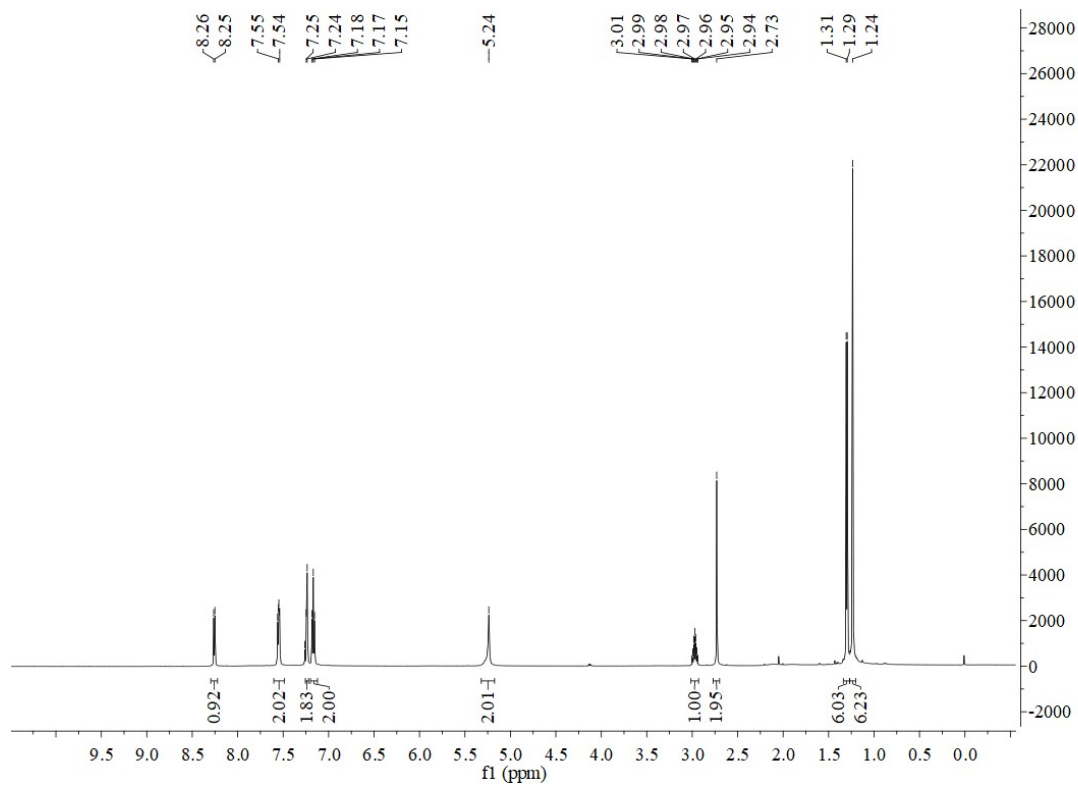

Figure 50. <sup>1</sup>H NMR spectrum of compound 5c



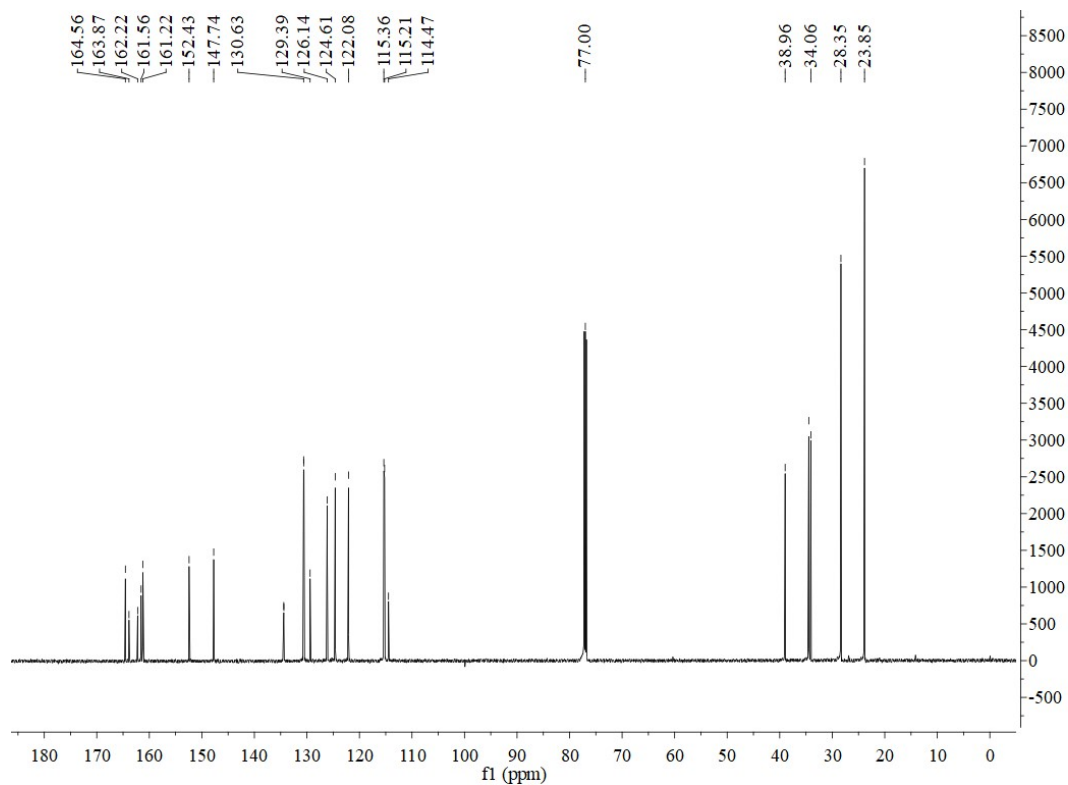

Figure 51.  $^{13}\text{C}$  NMR spectrum of compound **5c**

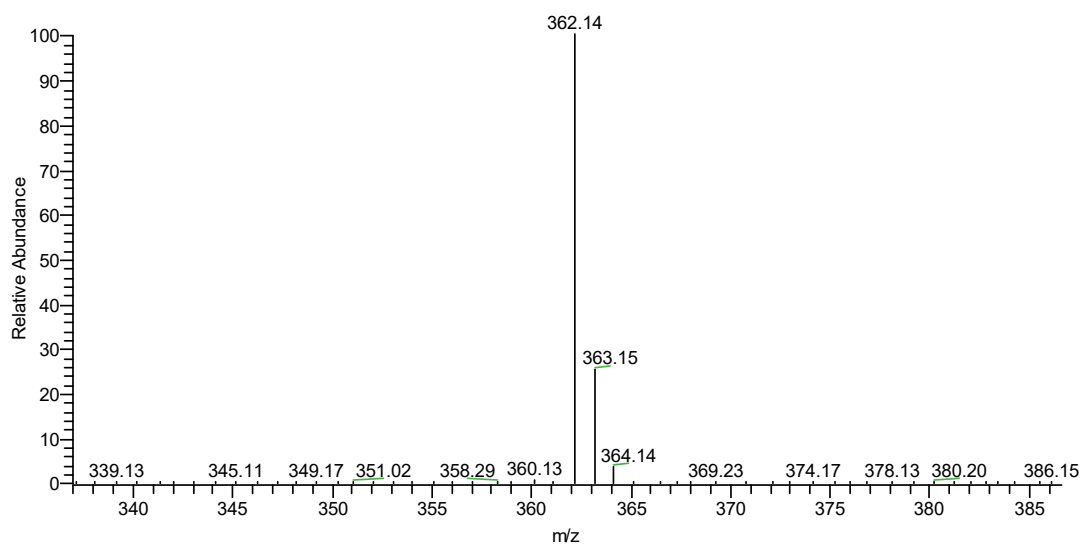

Figure 52. MS spectrum of compound **5c**

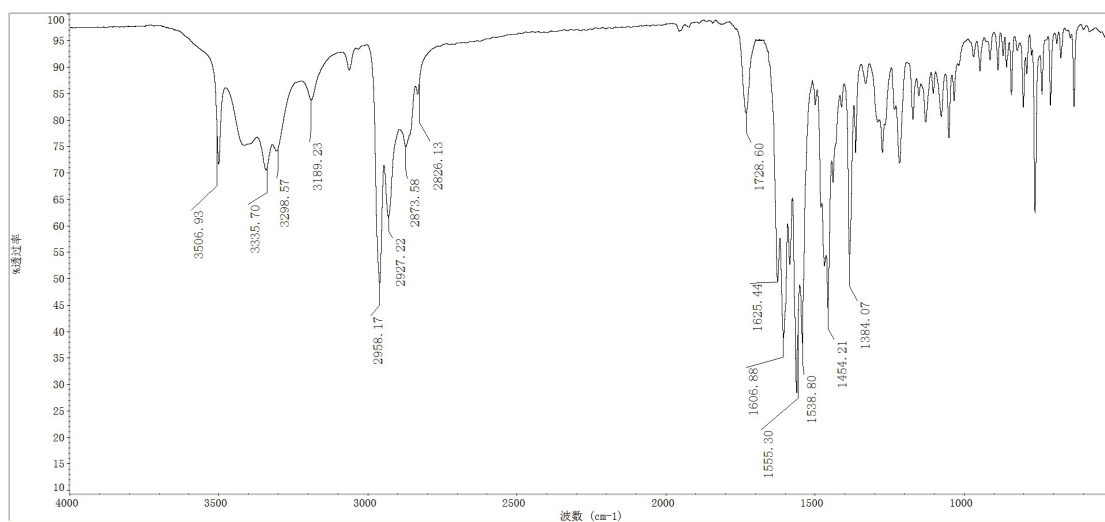

Figure 53. IR spectrum of compound 5d

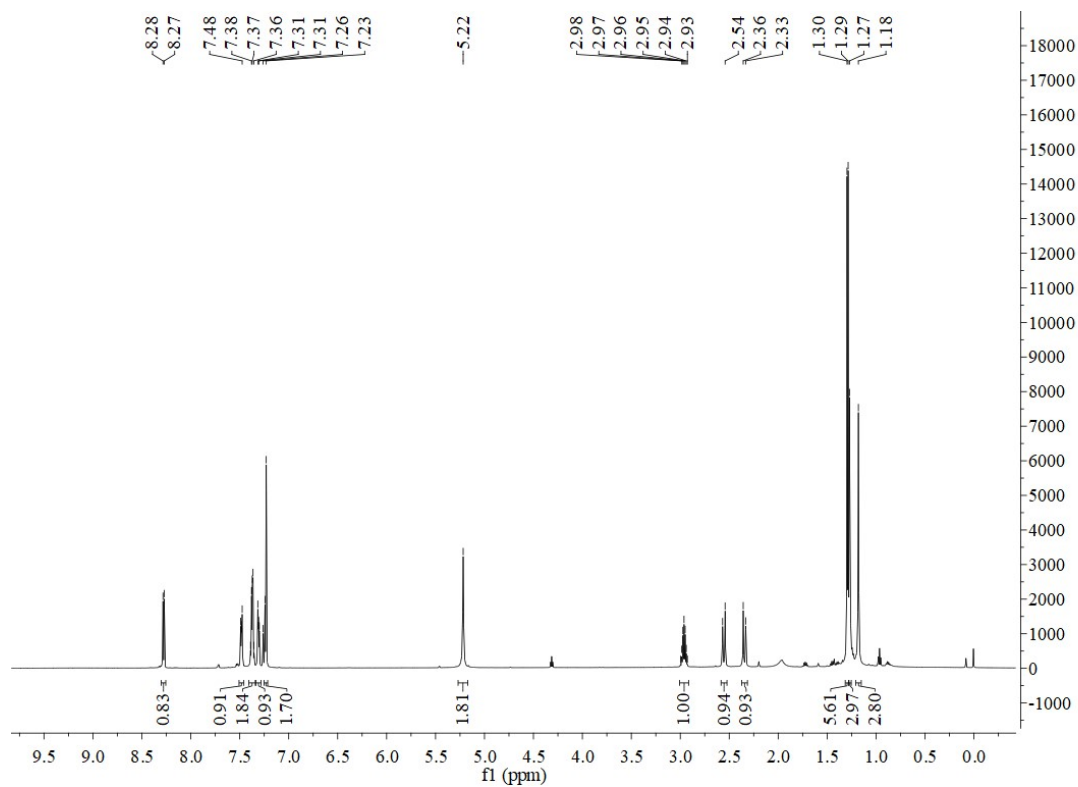

Figure 54. <sup>1</sup>H NMR spectrum of compound 5d

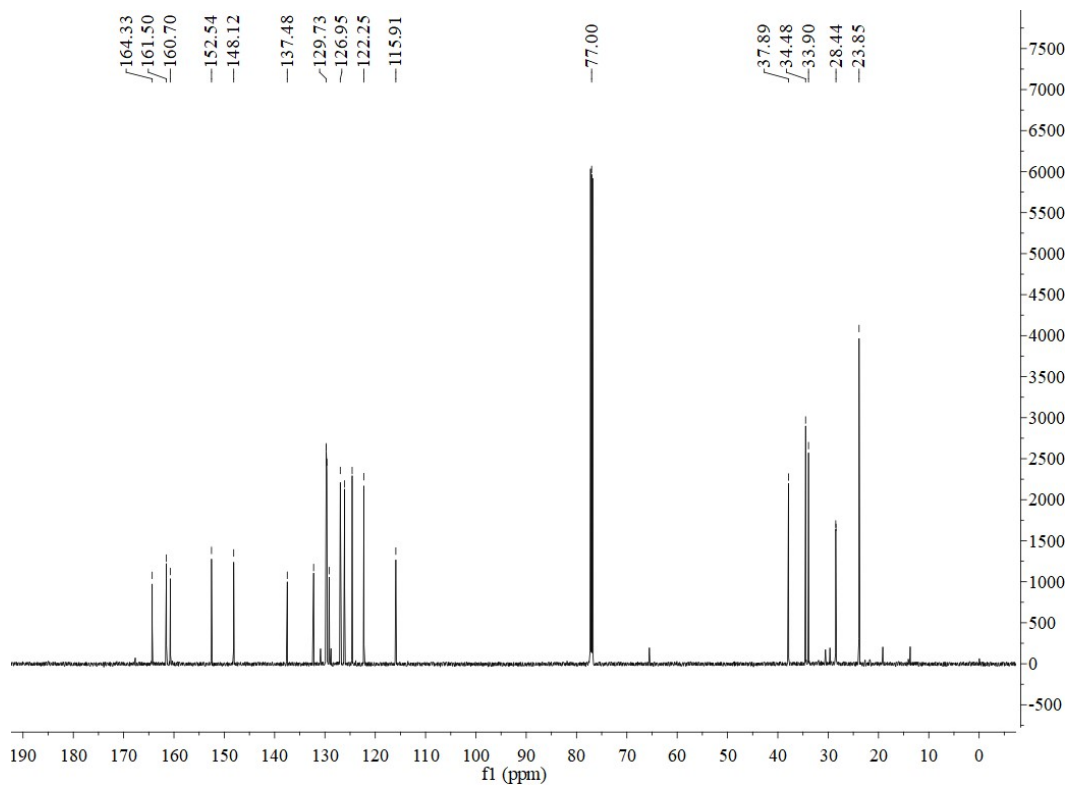

**Figure 55.**  $^{13}\text{C}$  NMR spectrum of compound **5d**

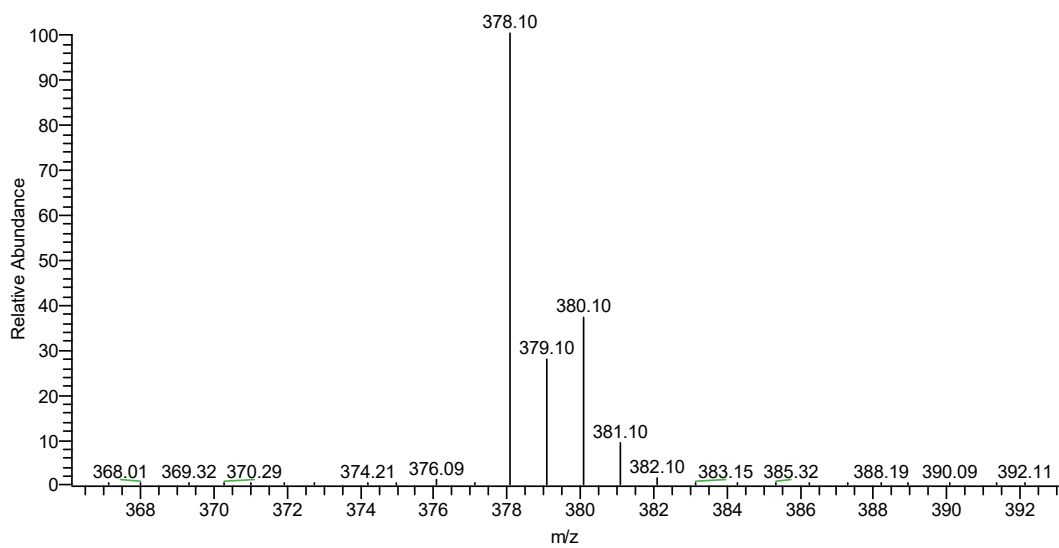

**Figure 56.** MS spectrum of compound **5d**

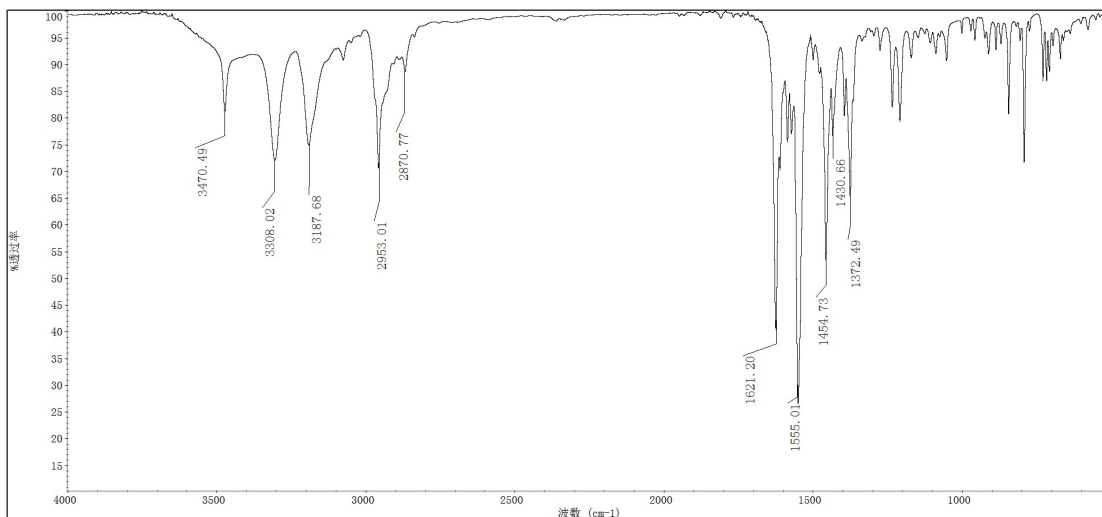

Figure 57. IR spectrum of compound 5e

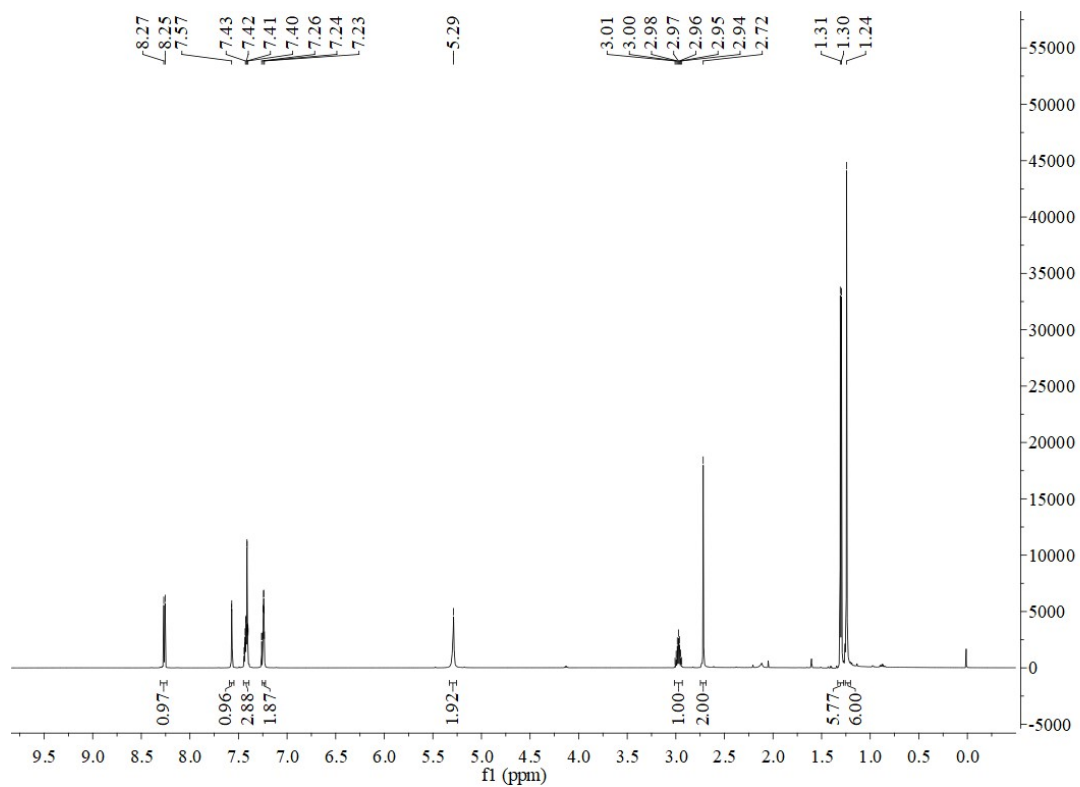

Figure 58. <sup>1</sup>H NMR spectrum of compound 5e

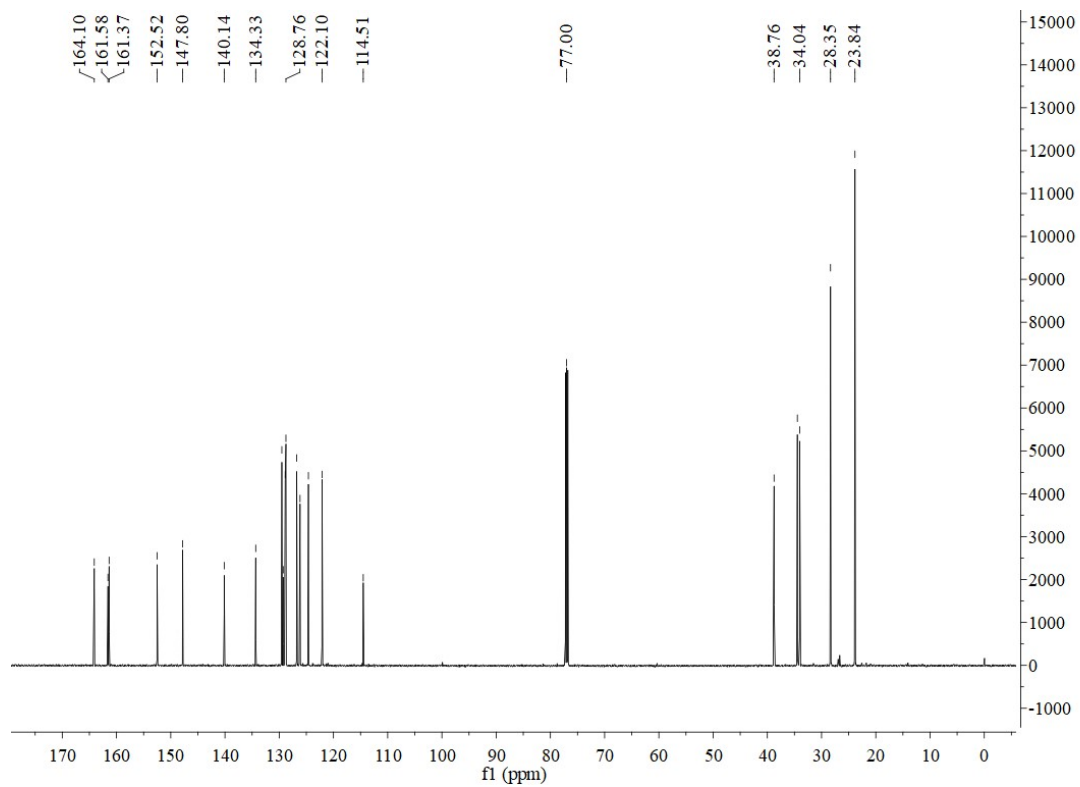

**Figure 59.**  $^{13}\text{C}$  NMR spectrum of compound **5e**

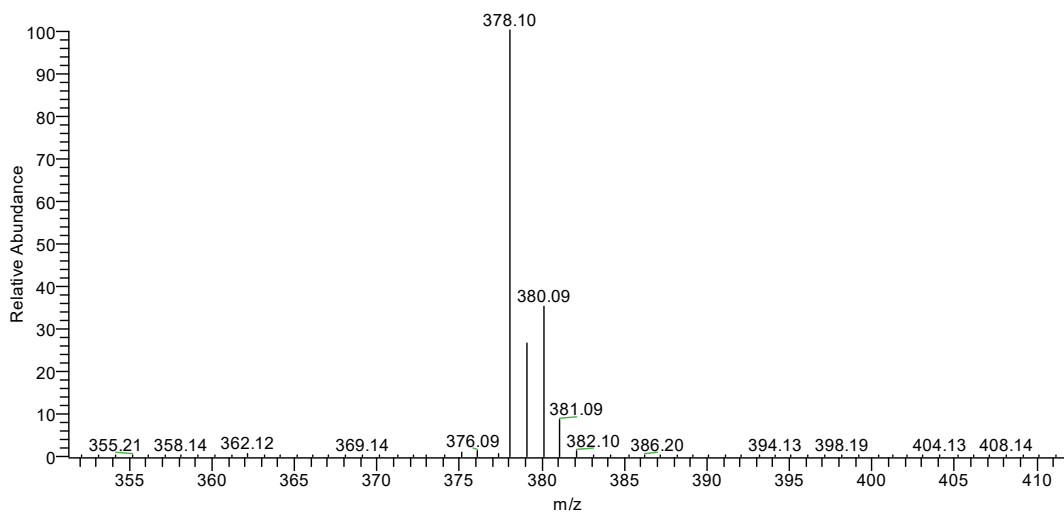

**Figure 60.** MS spectrum of compound **5e**

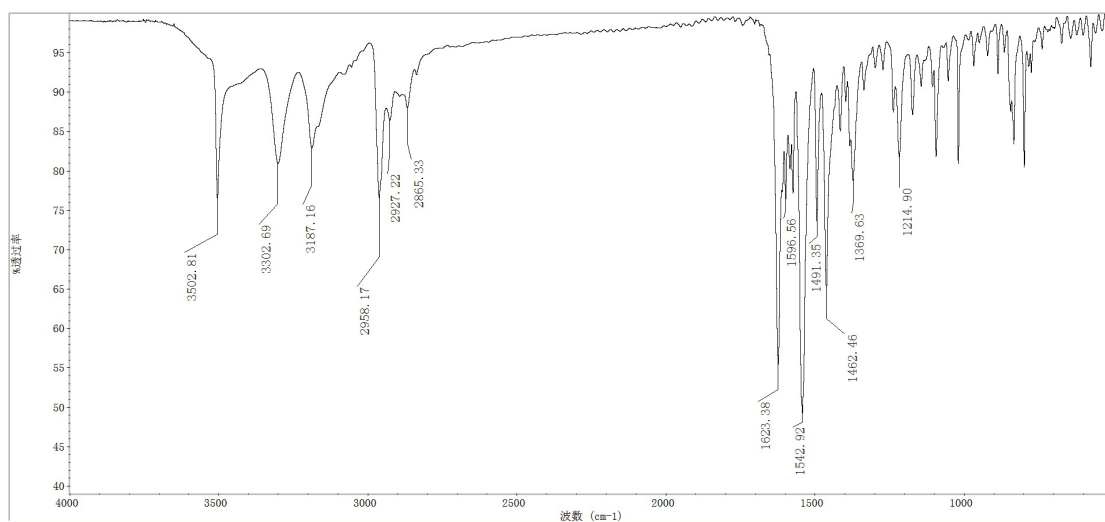

Figure 61. IR spectrum of compound **5f**

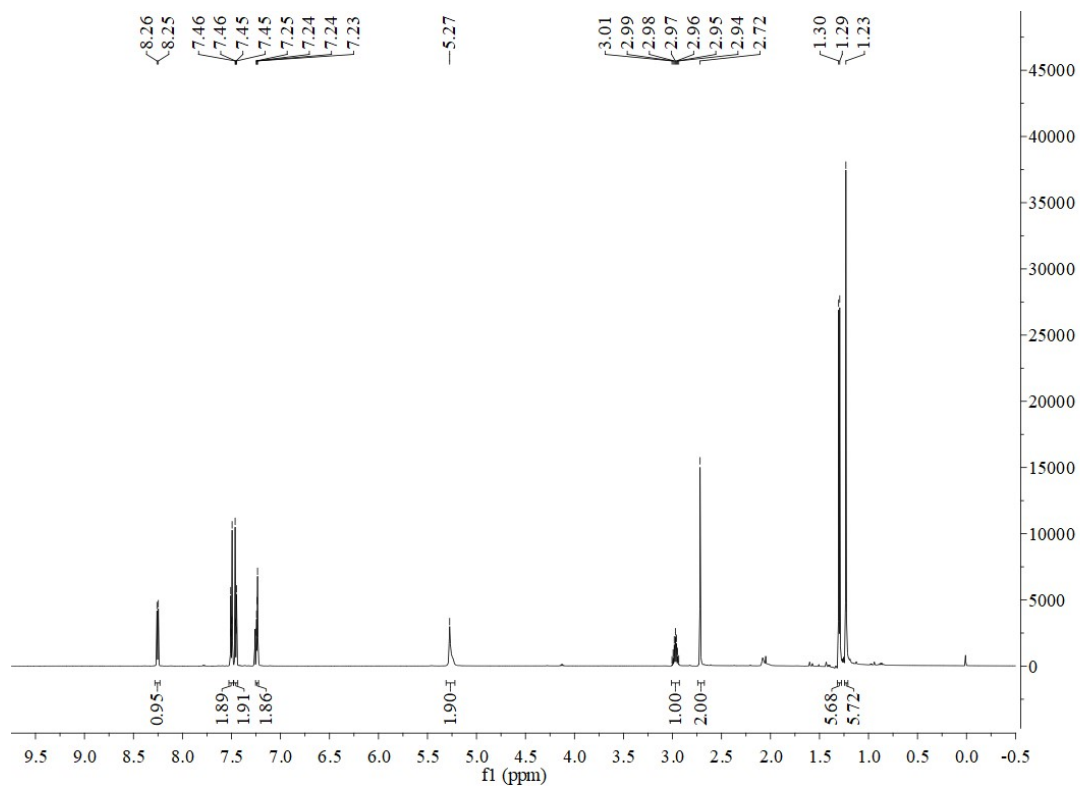

Figure 62.  $^1\text{H}$  NMR spectrum of compound **5f**

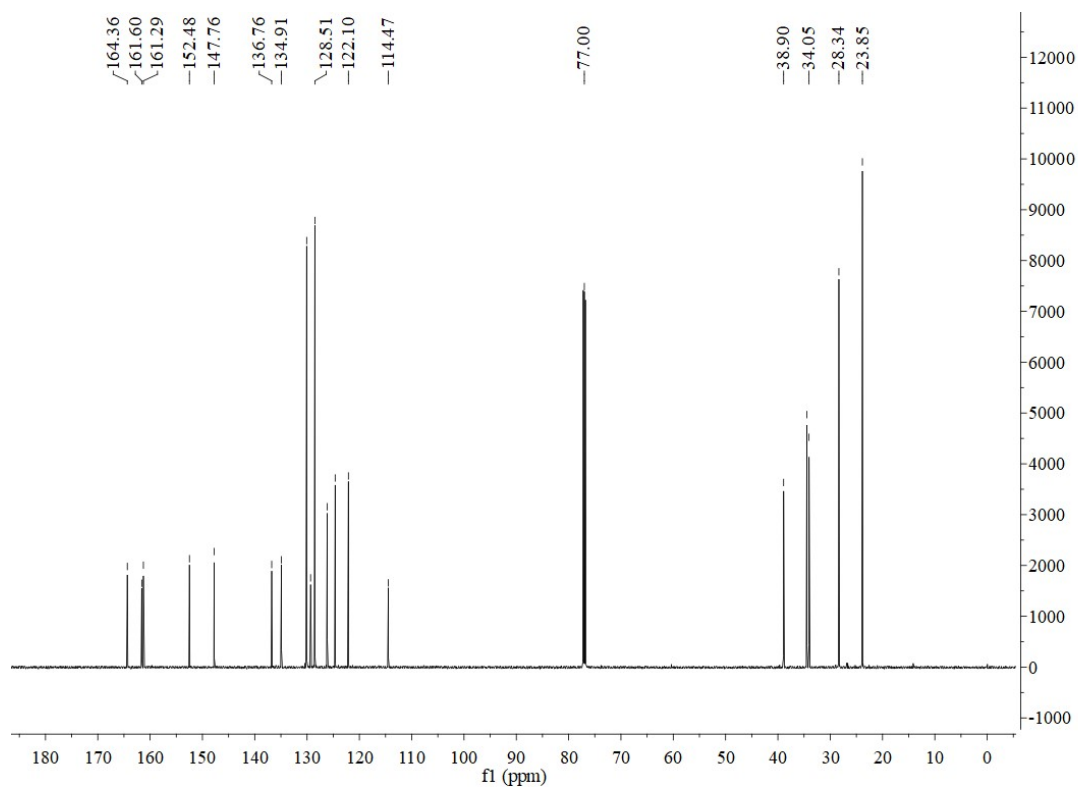

**Figure 63.**  $^{13}\text{C}$  NMR spectrum of compound **5f**

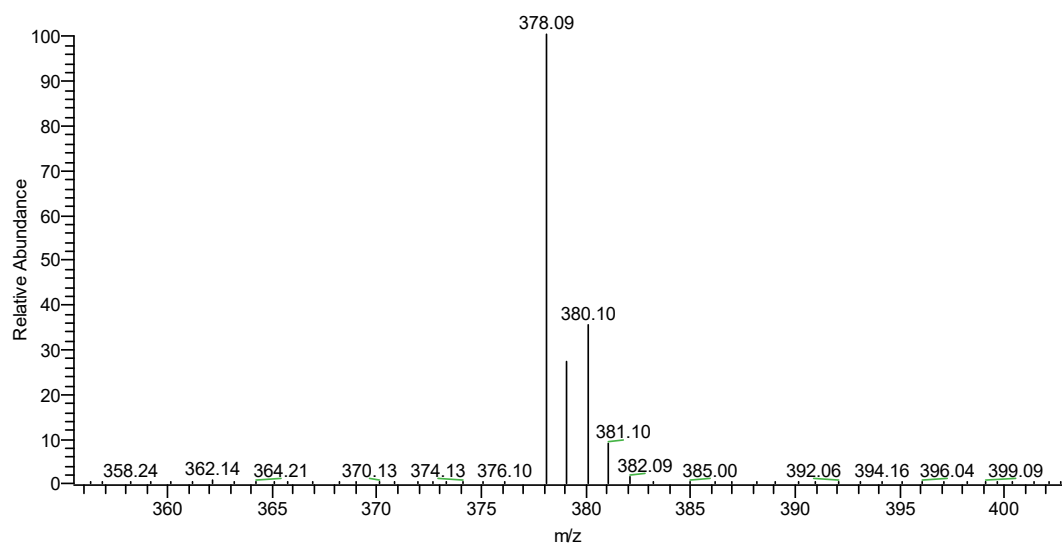

**Figure 64.** MS spectrum of compound **5f**

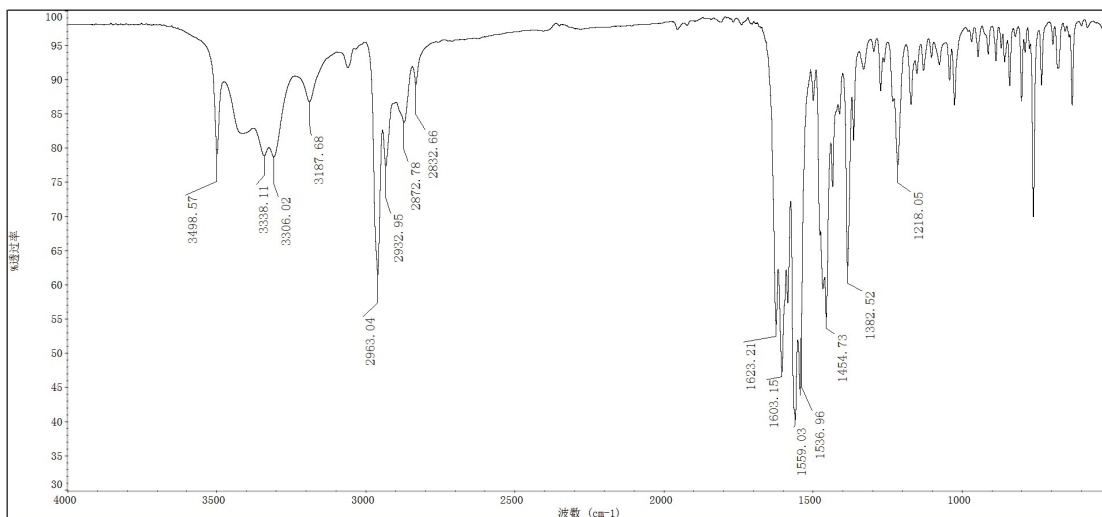

Figure 65. IR spectrum of compound 5g

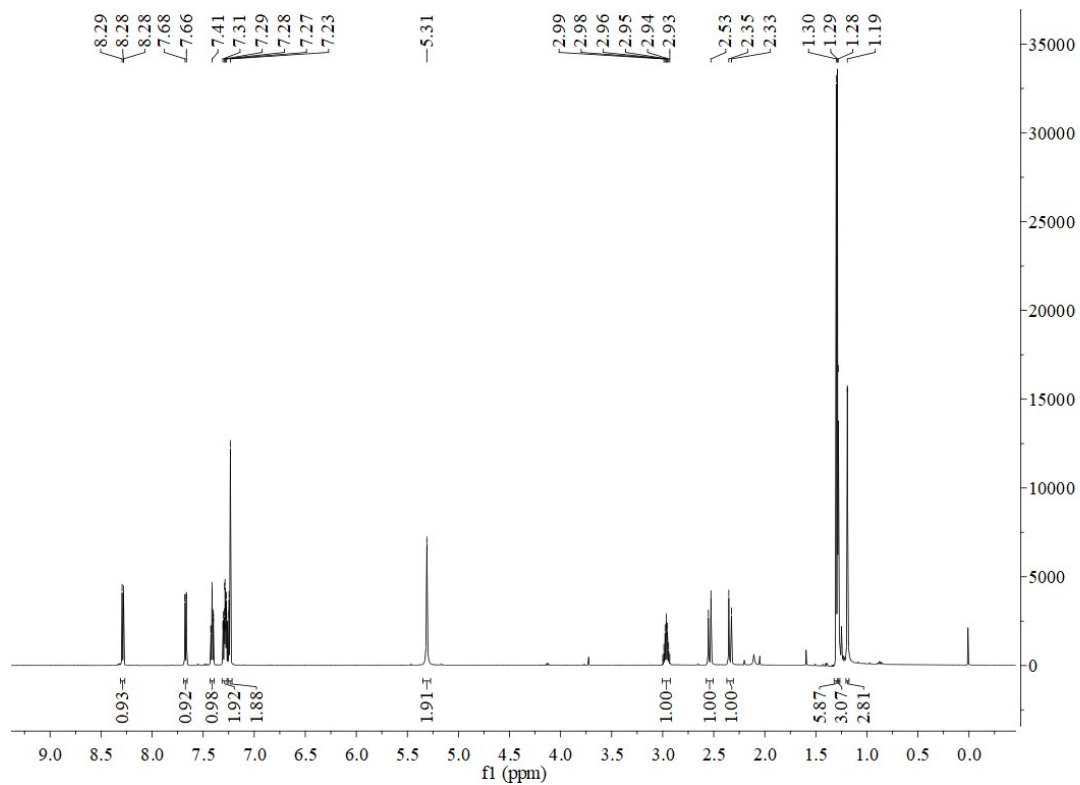

Figure 66. <sup>1</sup>H NMR spectrum of compound 5g



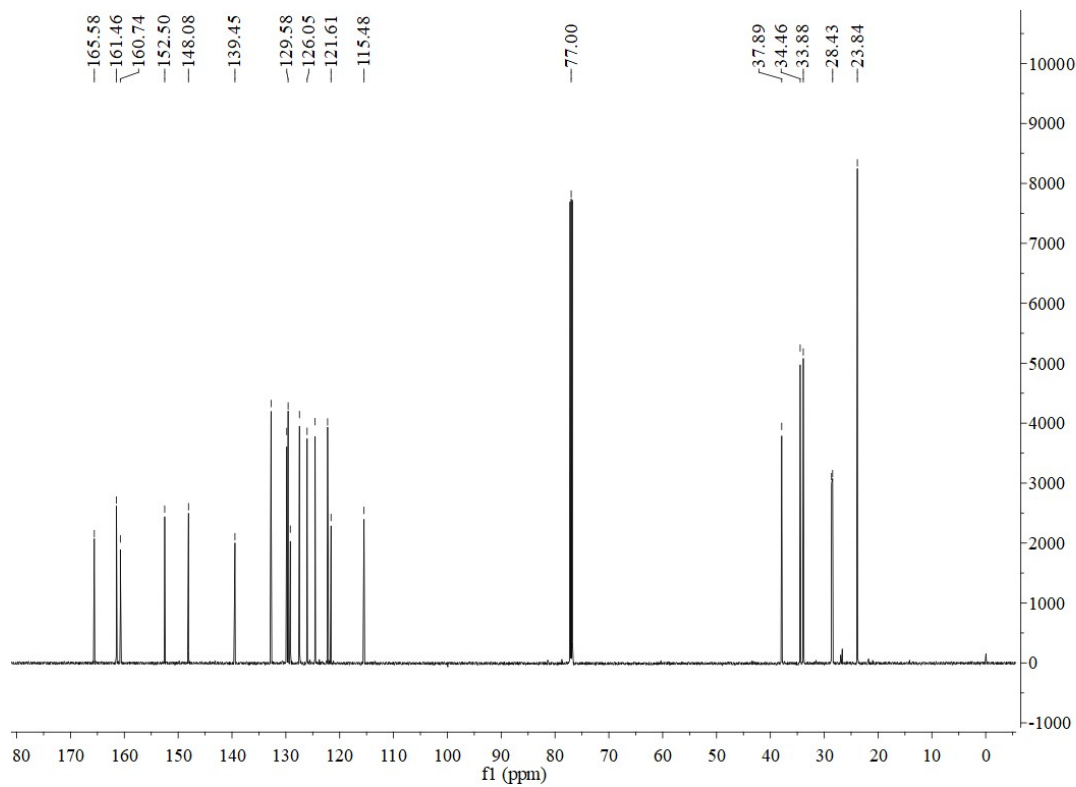

**Figure 67.**  $^{13}\text{C}$  NMR spectrum of compound **5g**

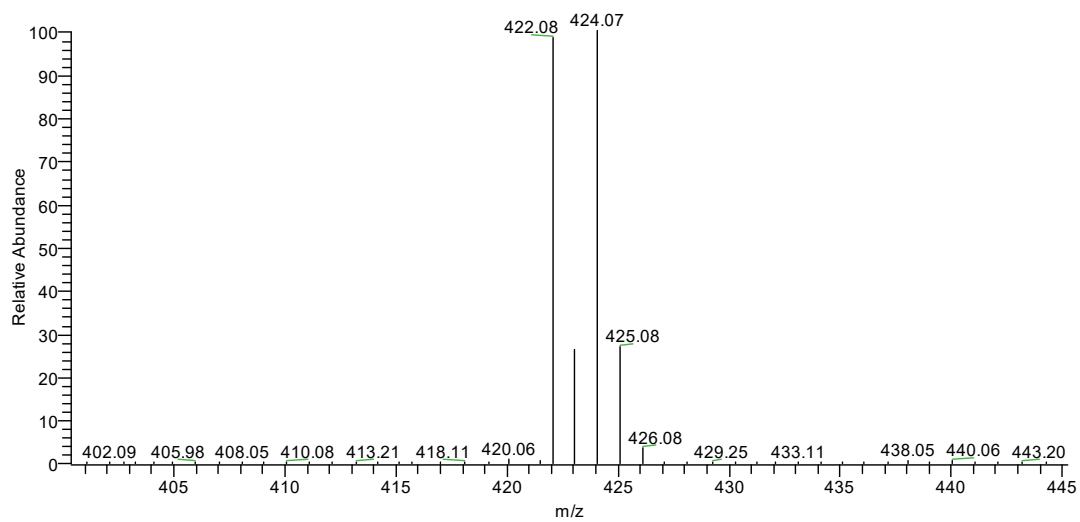

**Figure 68.** MS spectrum of compound **5g**

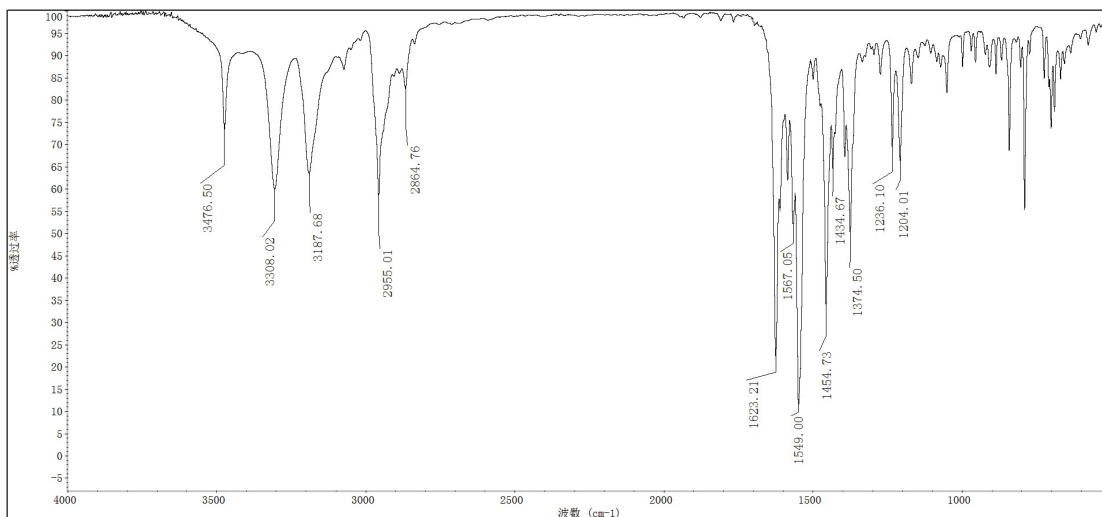

Figure 69. IR spectrum of compound 5h

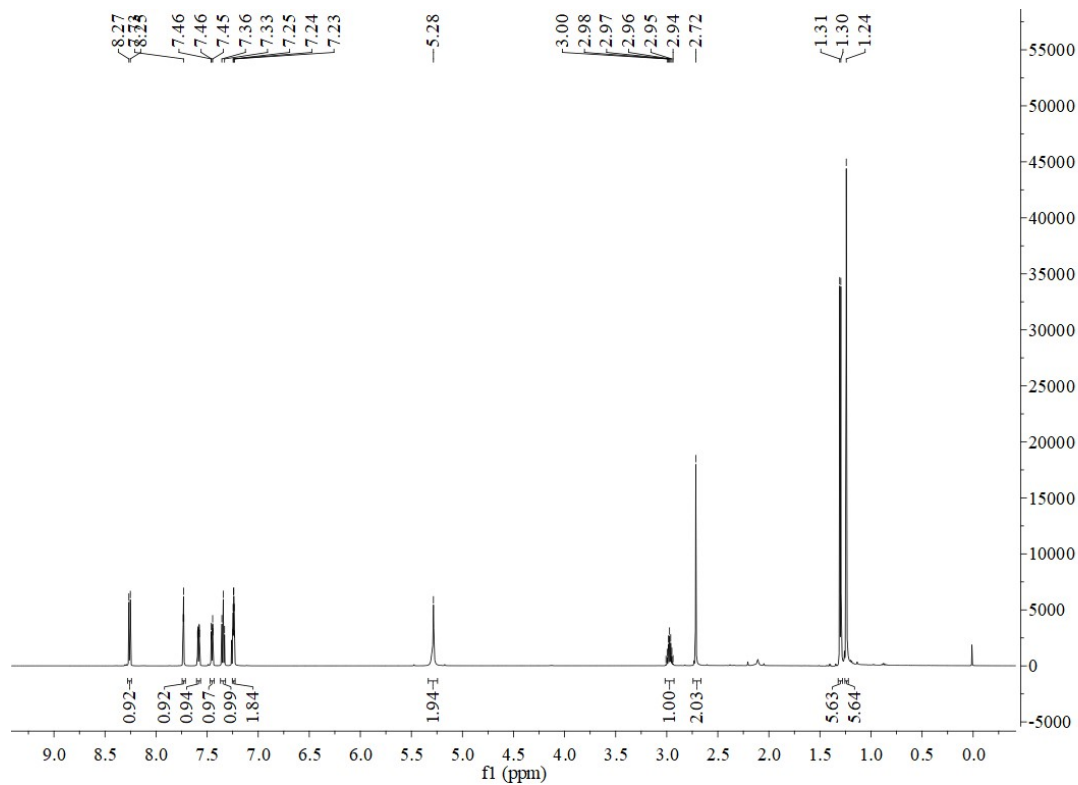

Figure 70. <sup>1</sup>H NMR spectrum of compound 5h

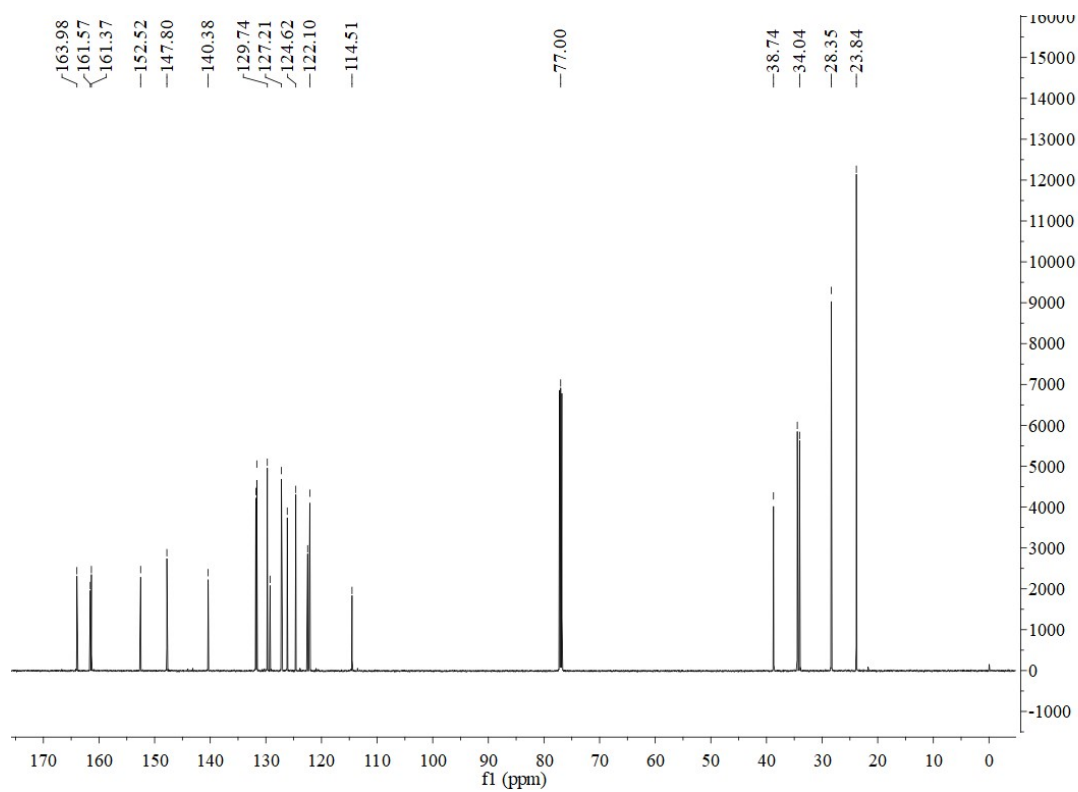

**Figure 71.**  $^{13}\text{C}$  NMR spectrum of compound **5h**

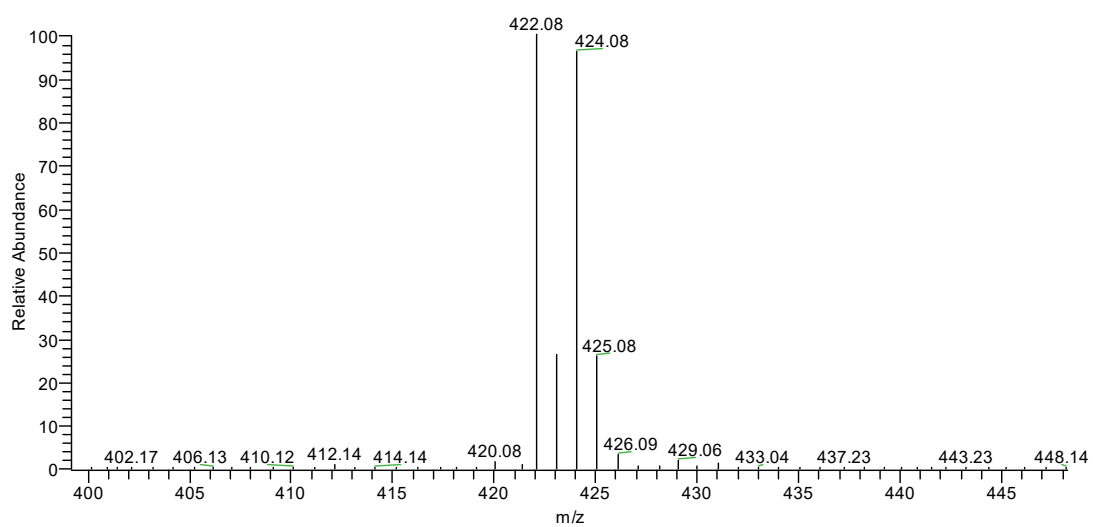

**Figure 72.** MS spectrum of compound **5h**

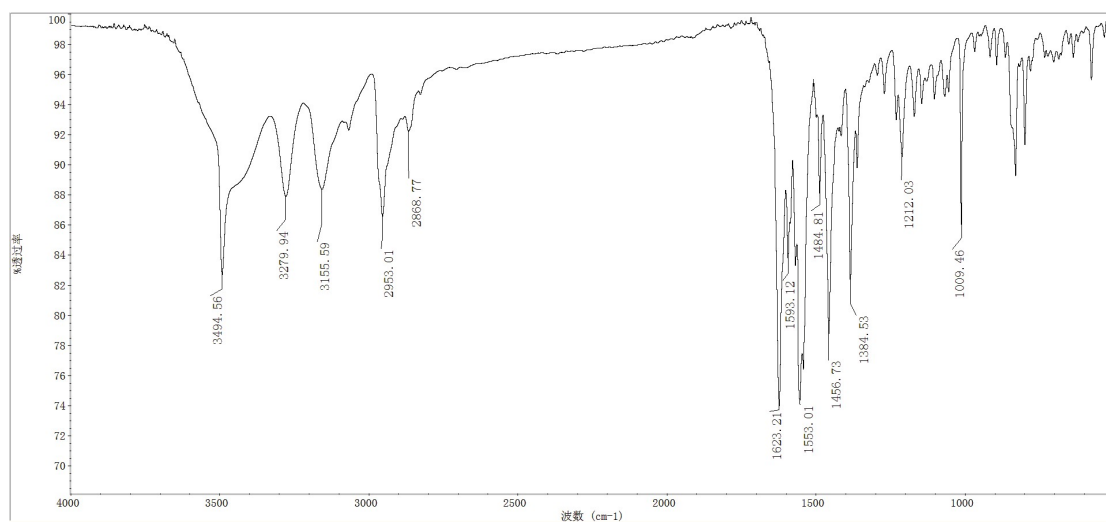

**Figure 73.** IR spectrum of compound **5i**

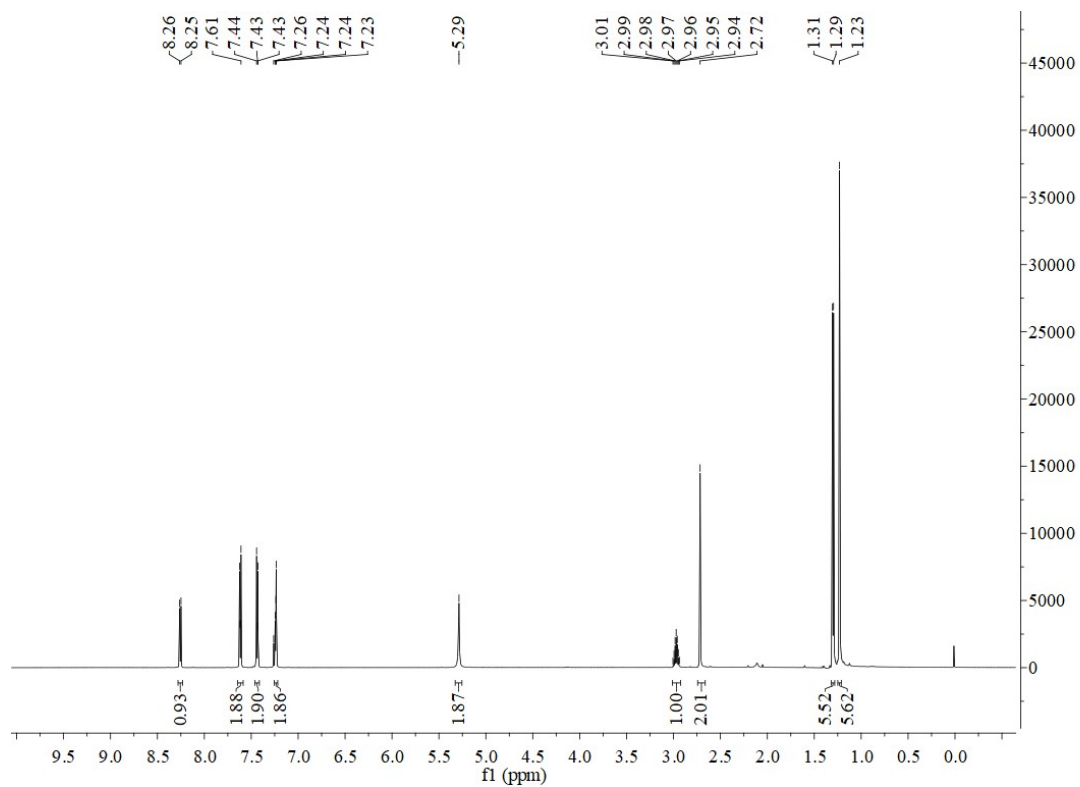

**Figure 74.**  $^1\text{H}$  NMR spectrum of compound **5i**

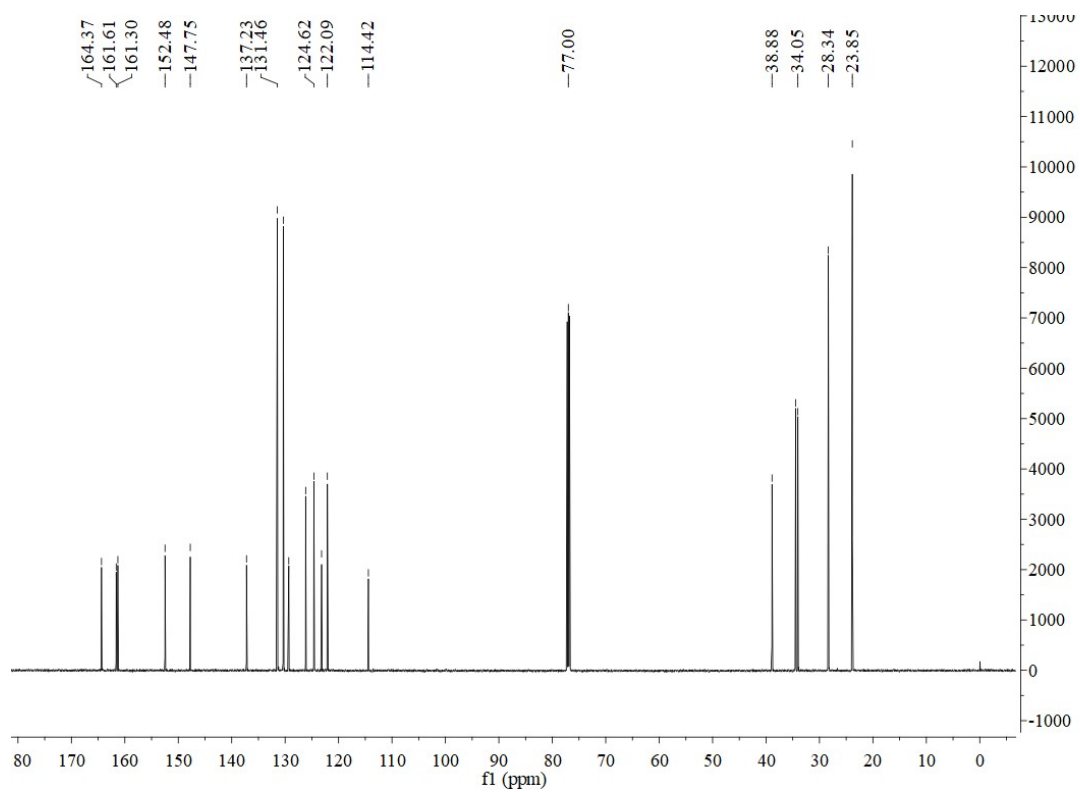

**Figure 75.**  $^{13}\text{C}$  NMR spectrum of compound **5i**

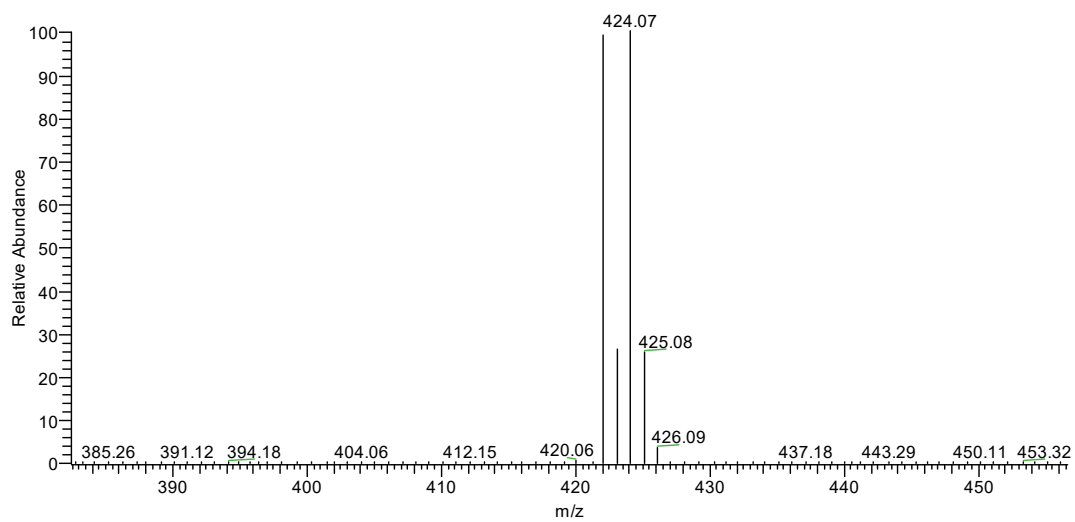

**Figure 76.** MS spectrum of compound **5i**

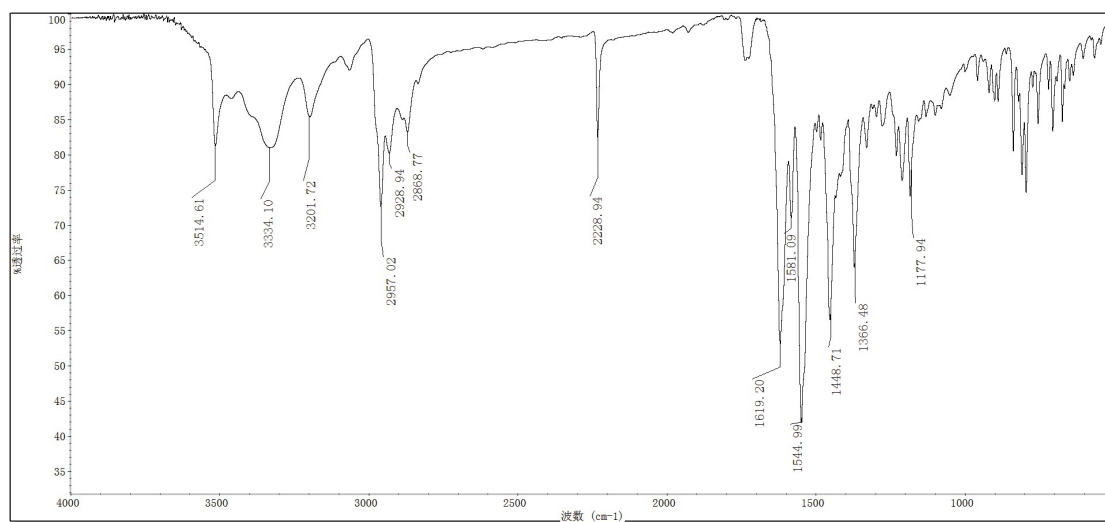

**Figure 77.** IR spectrum of compound **5j**

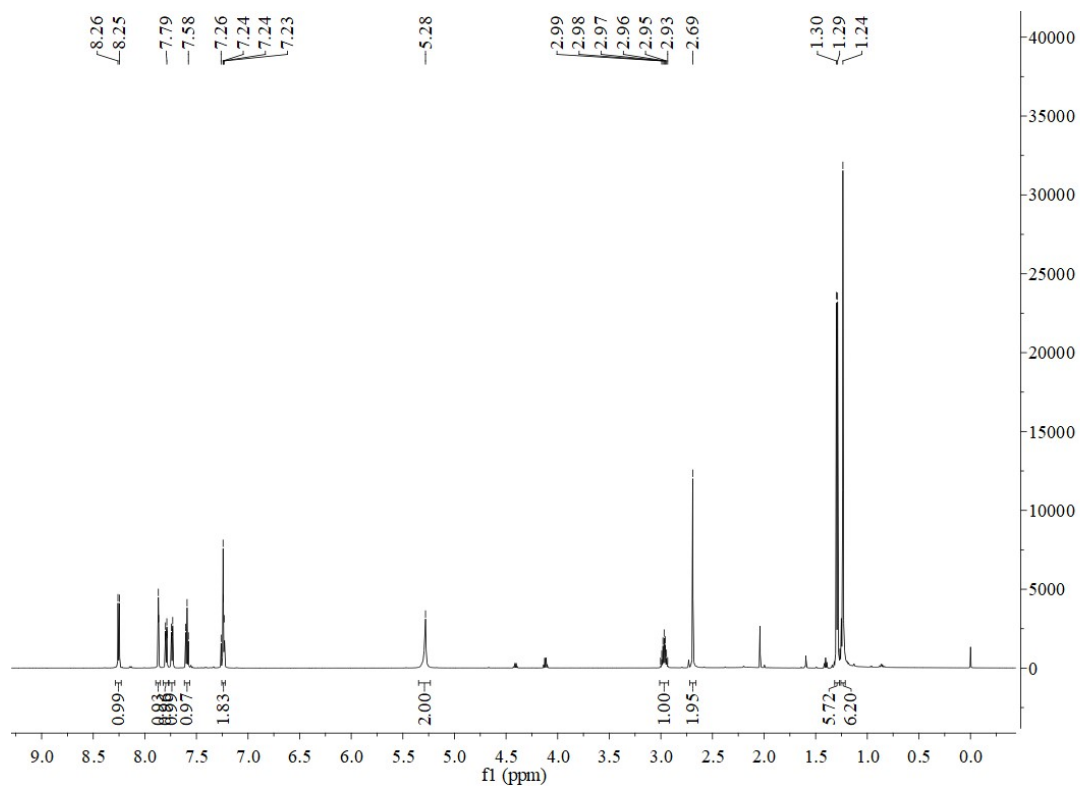

**Figure 78.** <sup>1</sup>H NMR spectrum of compound **5j**

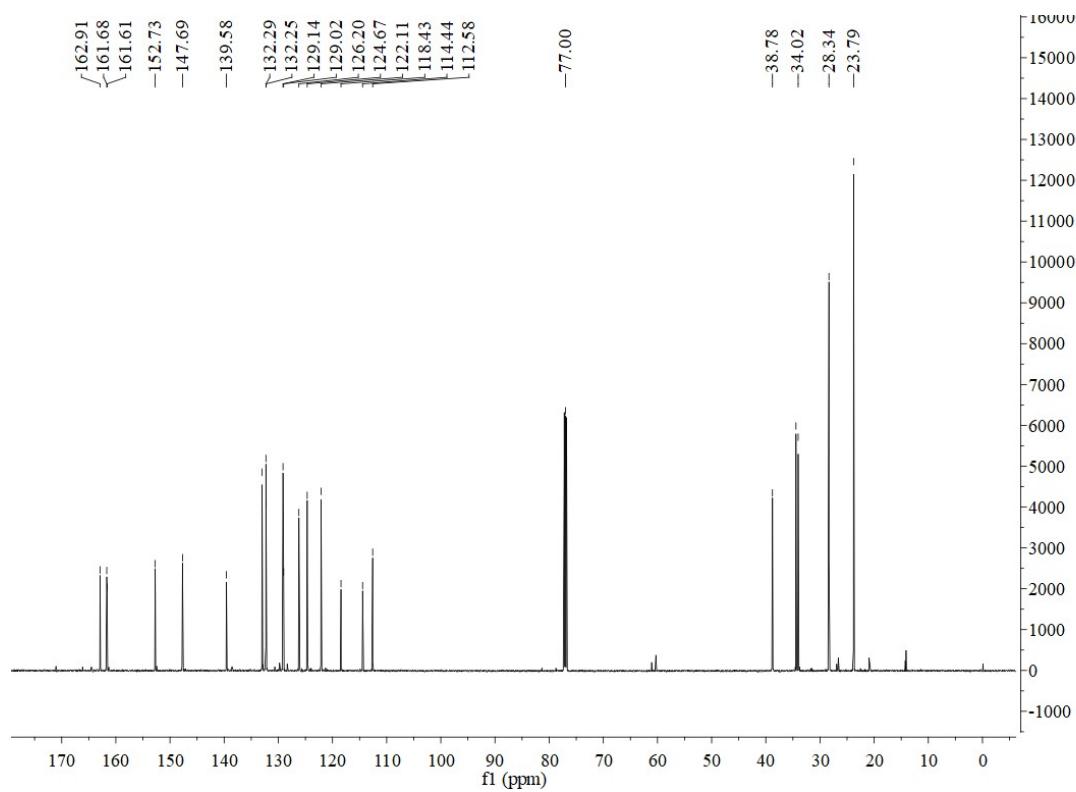

**Figure 79.**  $^{13}\text{C}$  NMR spectrum of compound **5j**

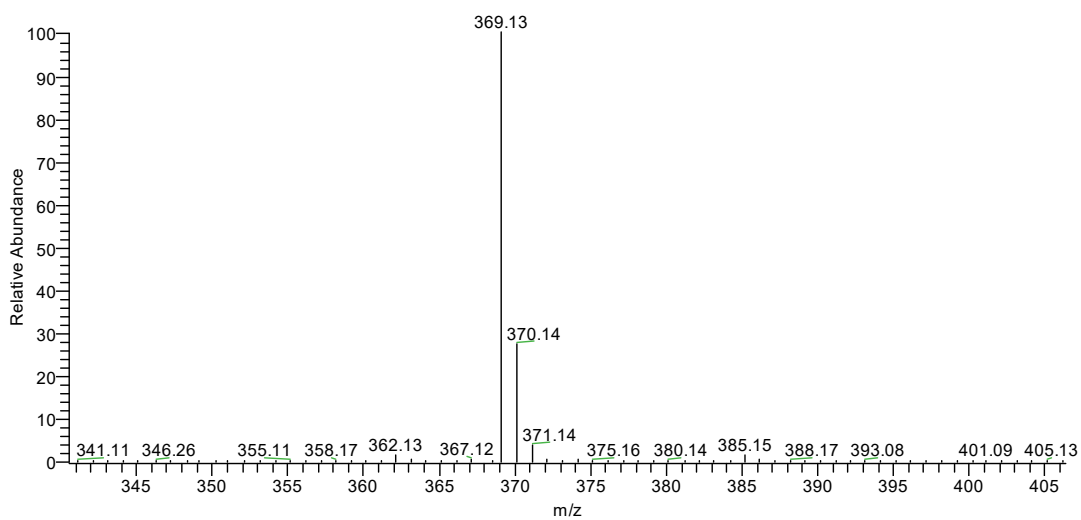

**Figure 80.** MS spectrum of compound **5j**

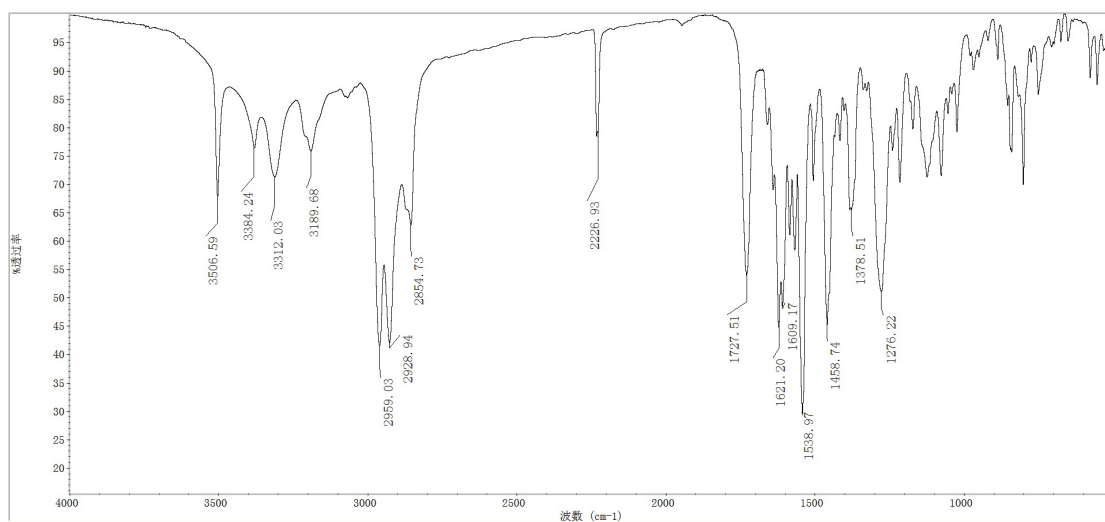

Figure 81. IR spectrum of compound **5k**

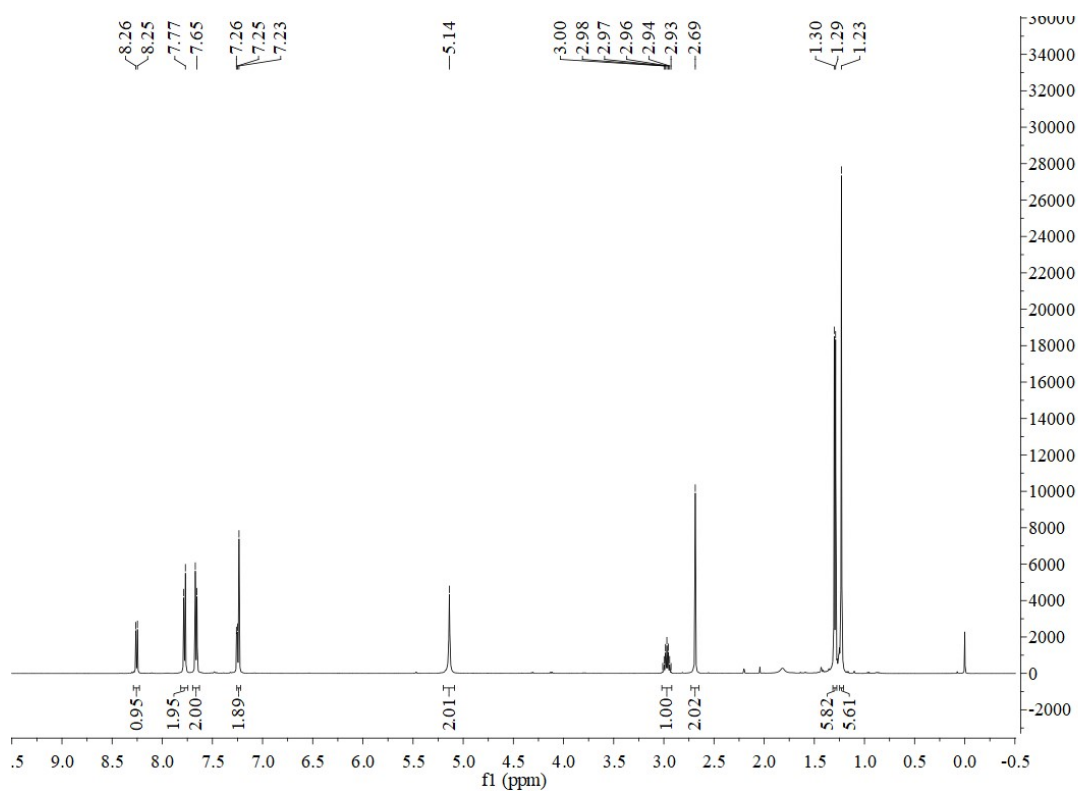

Figure 82.  $^1\text{H}$  NMR spectrum of compound **5k**



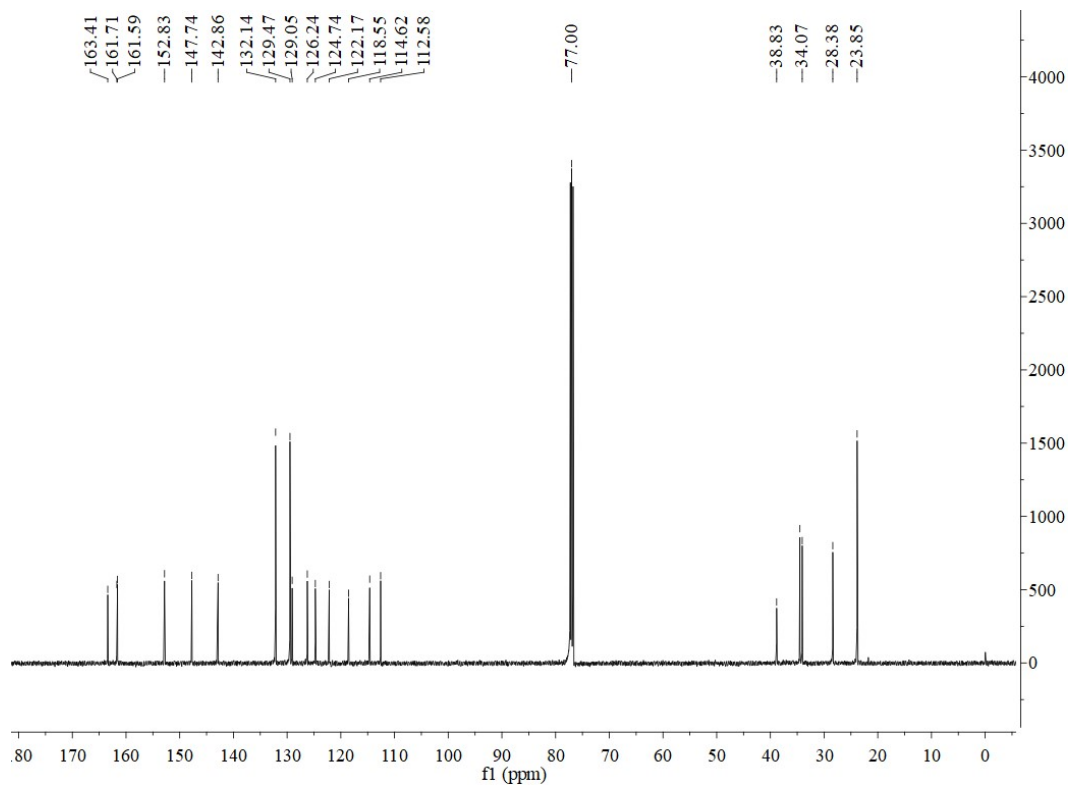

**Figure 83.**  $^{13}\text{C}$  NMR spectrum of compound **5k**

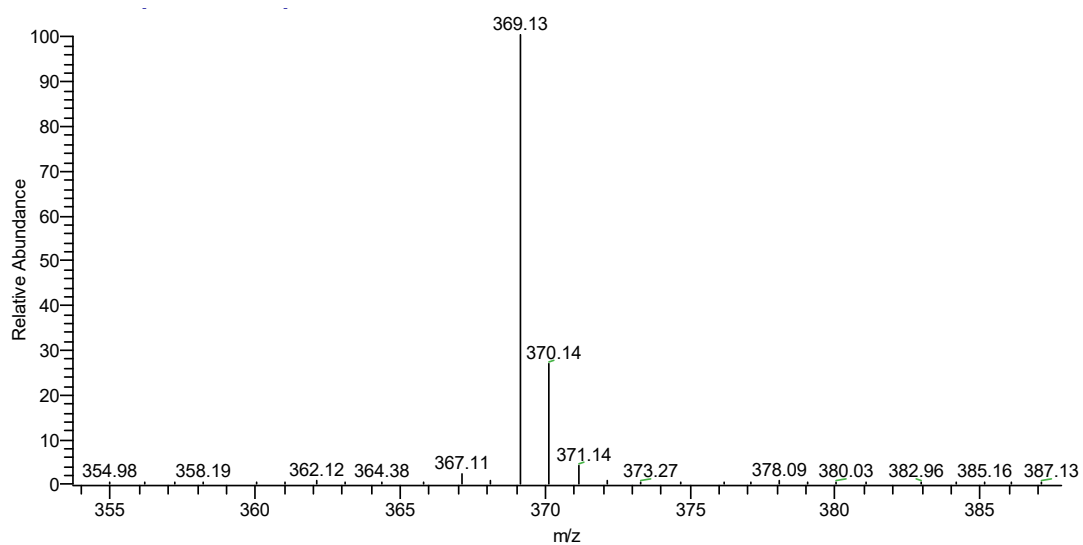

**Figure 84.** MS spectrum of compound **5k**

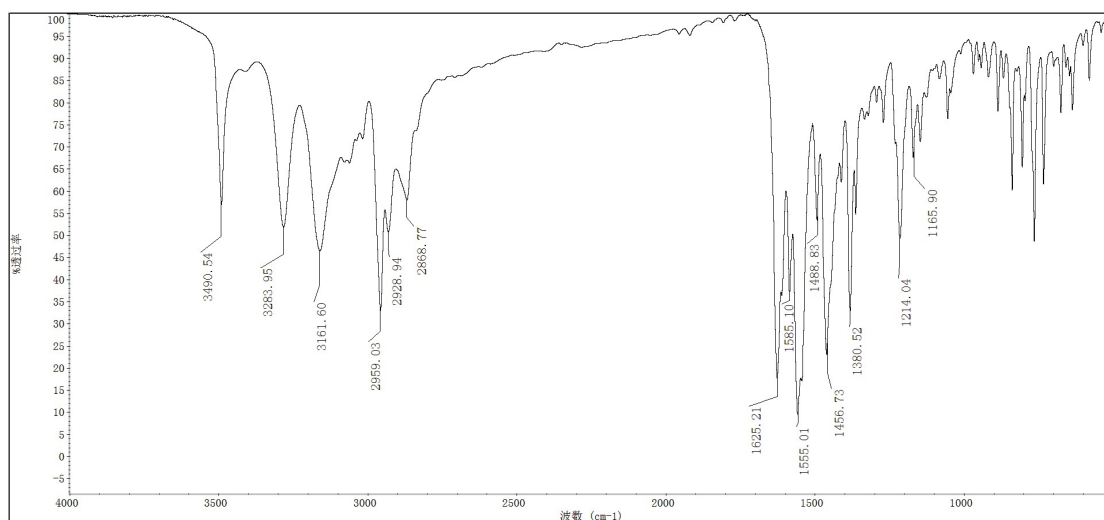

Figure 85. IR spectrum of compound 51

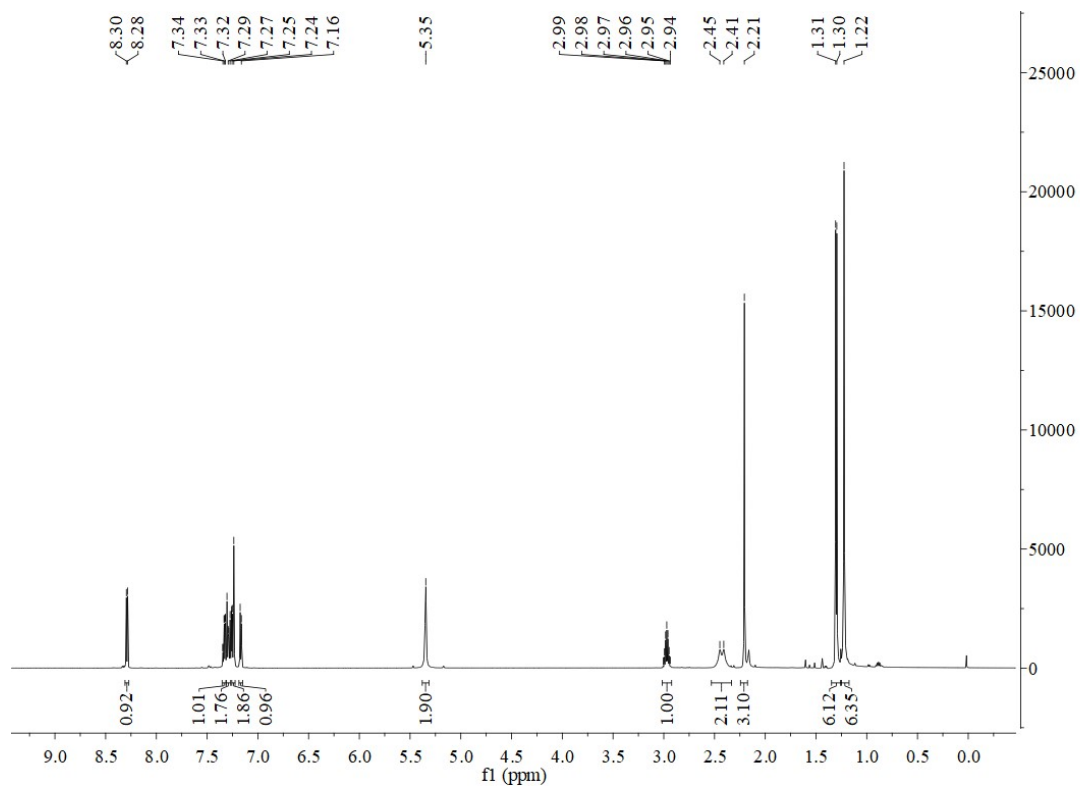

Figure 86. <sup>1</sup>H NMR spectrum of compound 51

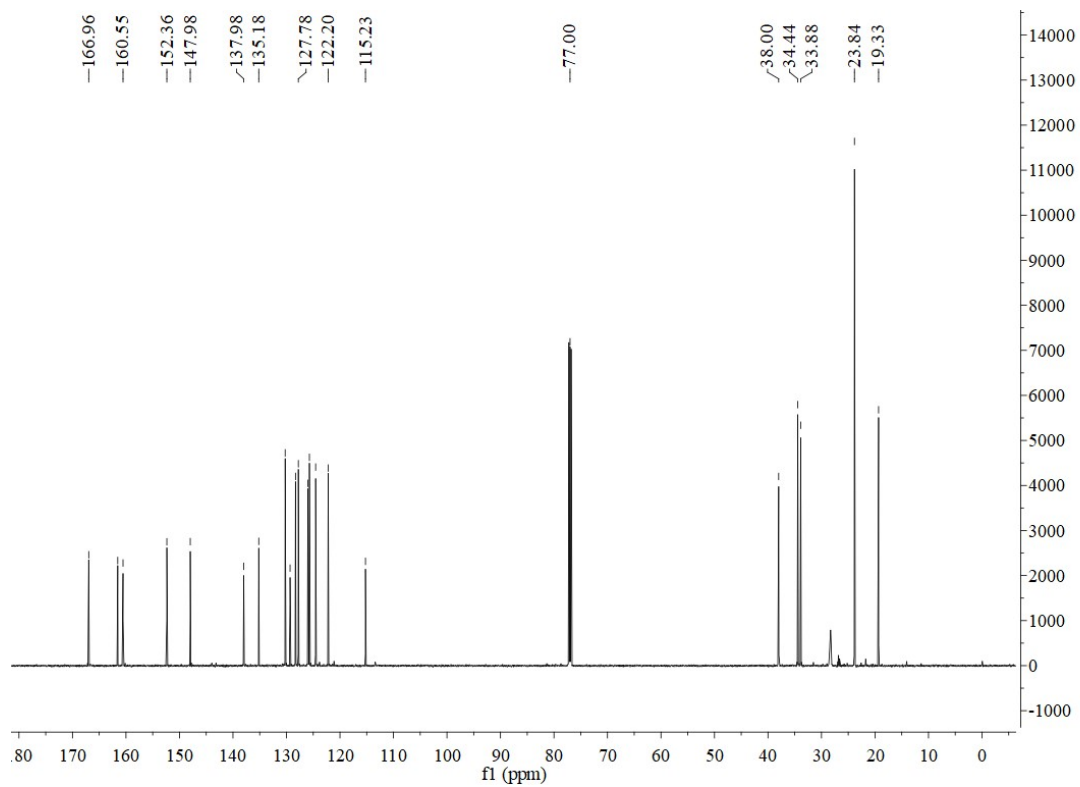

**Figure 87.**  $^{13}\text{C}$  NMR spectrum of compound **5I**

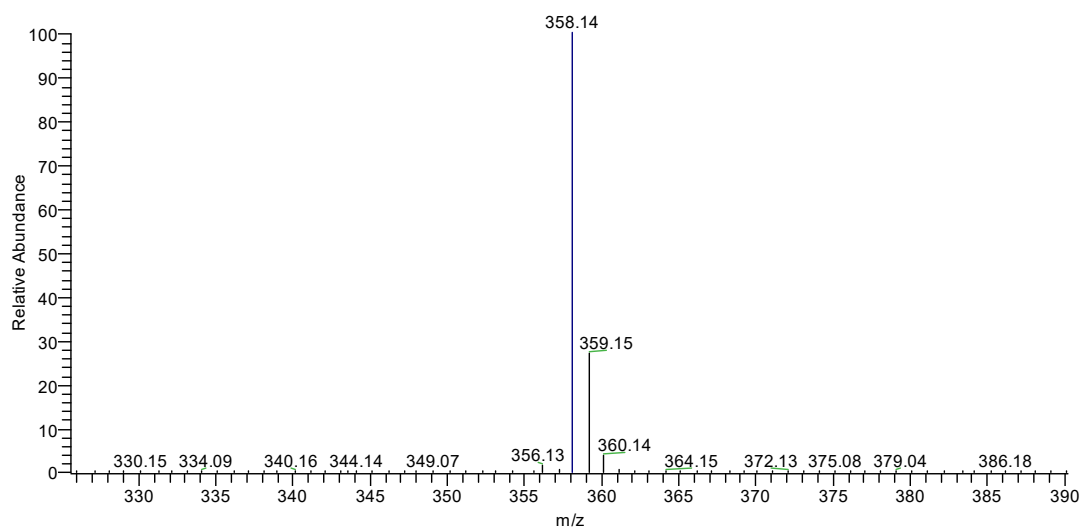

**Figure 88.** MS spectrum of compound **5I**

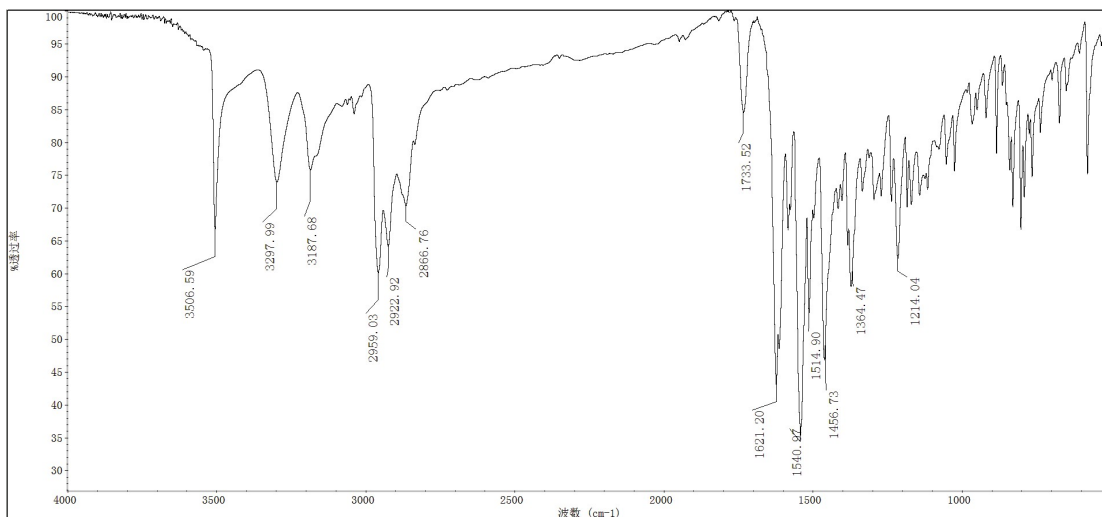

Figure 89. IR spectrum of compound 5m

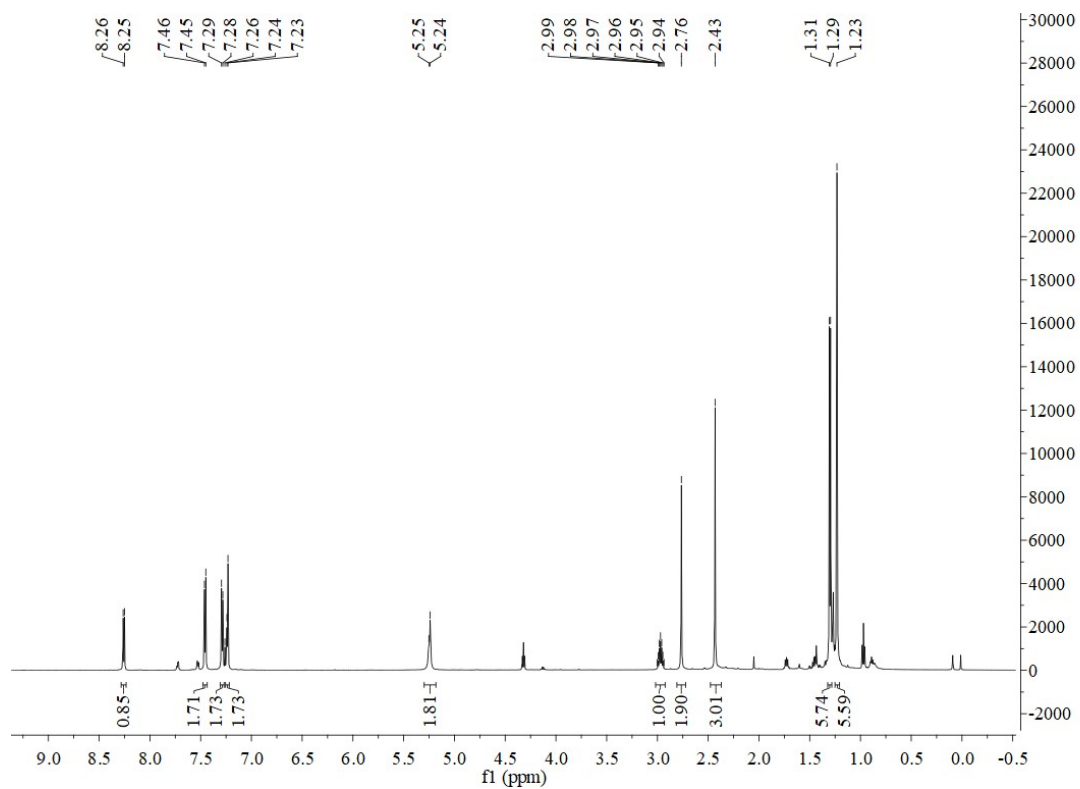

Figure 90. <sup>1</sup>H NMR spectrum of compound 5m

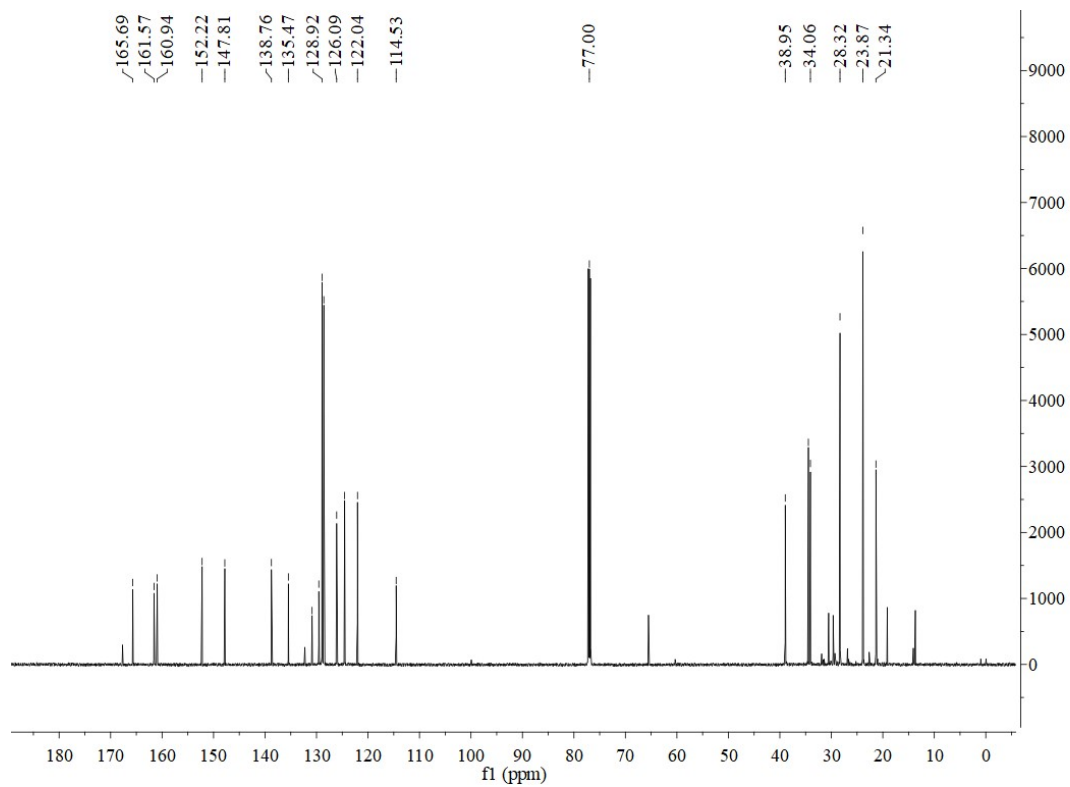

**Figure 91.**  $^{13}\text{C}$  NMR spectrum of compound **5m**

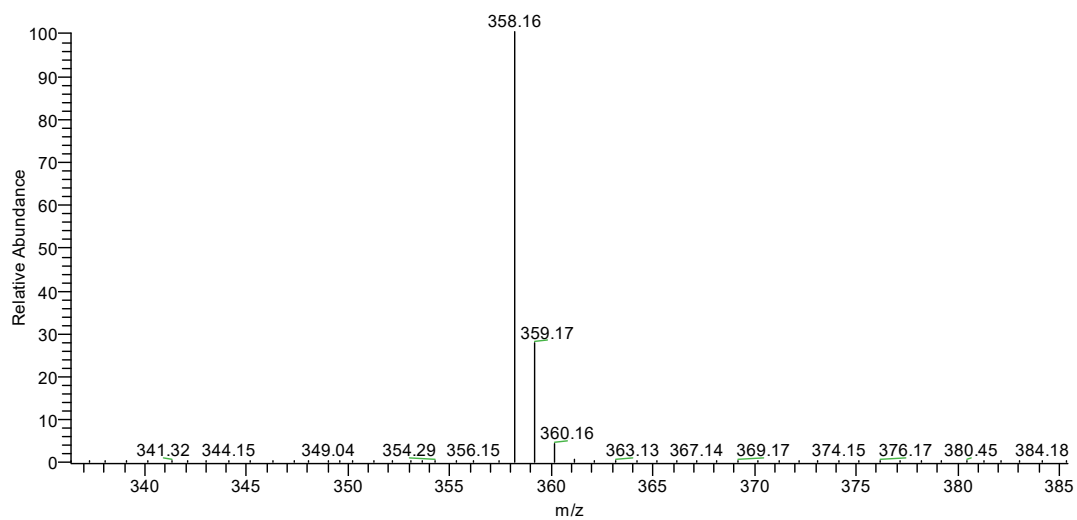

**Figure 92.** MS spectrum of compound **5m**

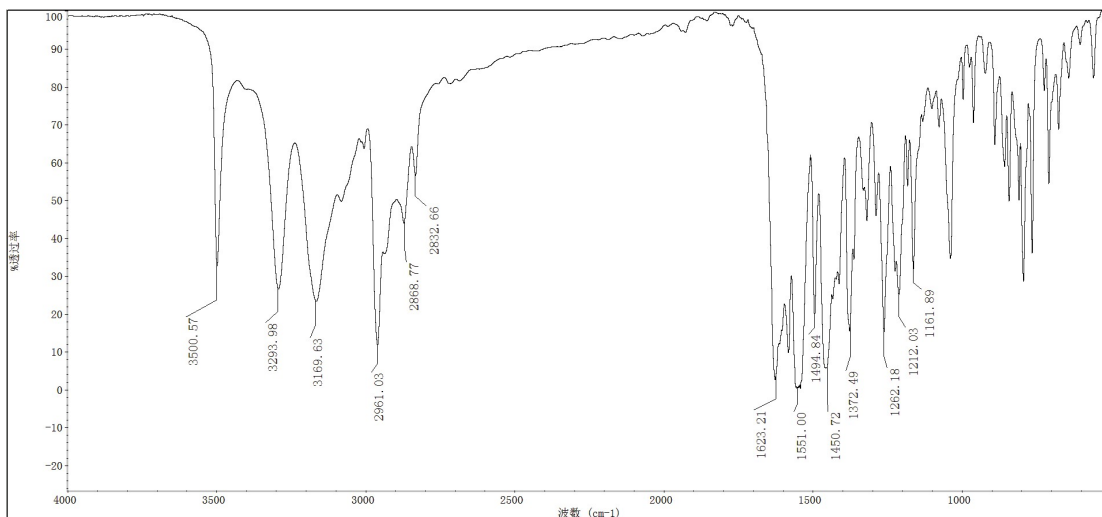

Figure 93. IR spectrum of compound 5n

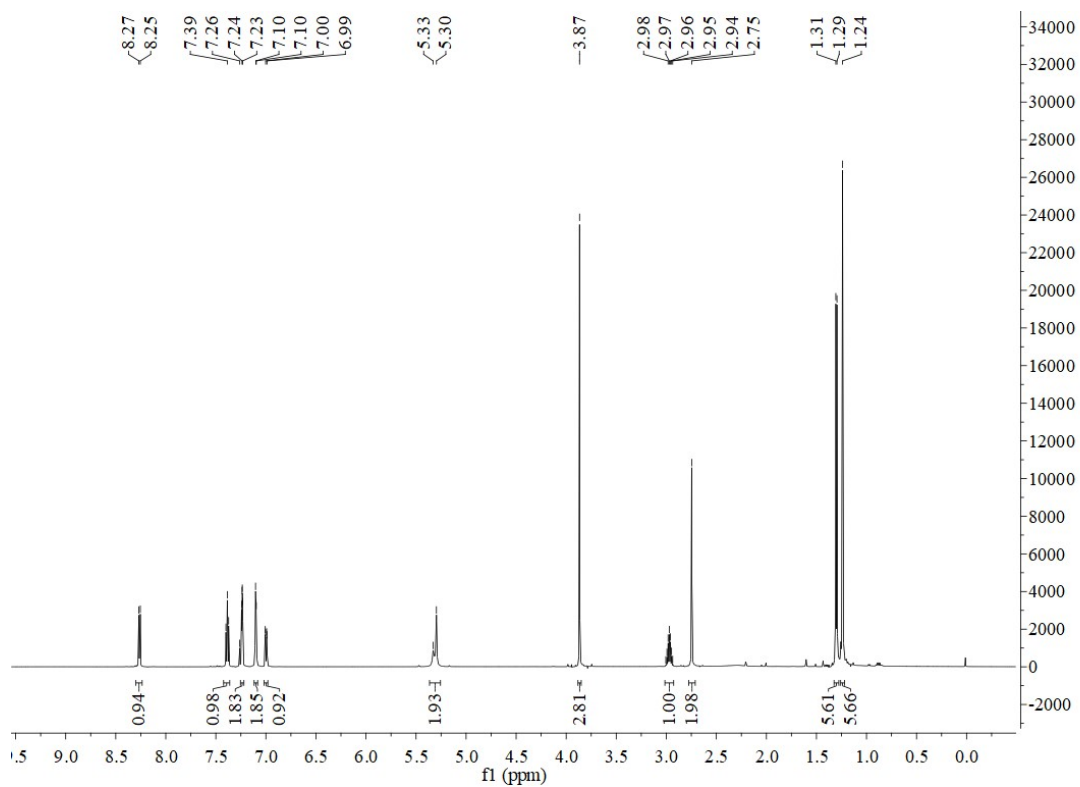

Figure 94. <sup>1</sup>H NMR spectrum of compound 5n

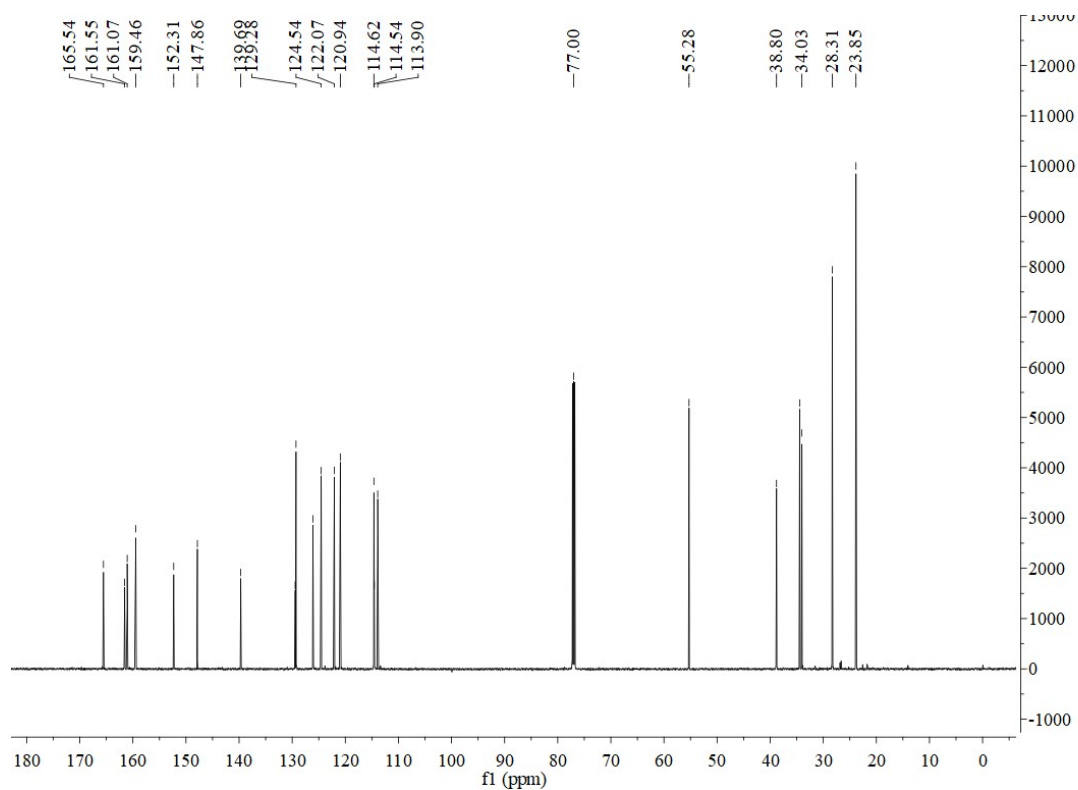

**Figure 95.**  $^{13}\text{C}$  NMR spectrum of compound **5n**

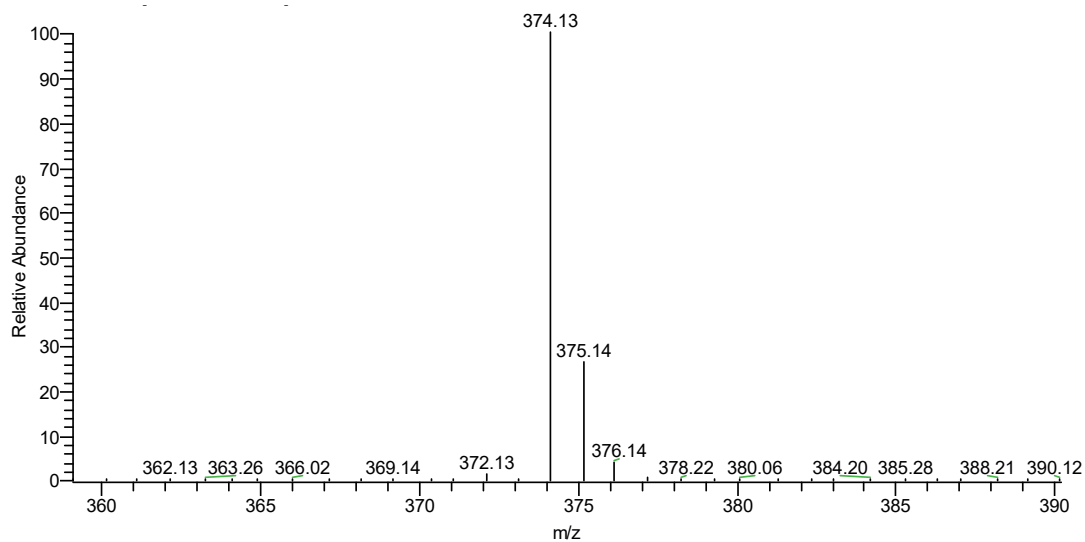

**Figure 96.** MS spectrum of compound **5n**

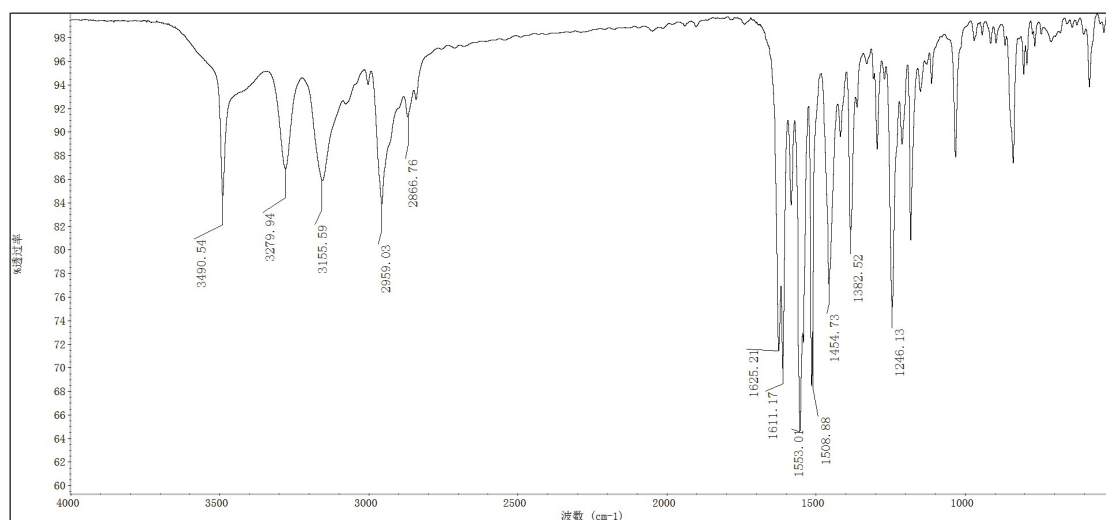

Figure 97. IR spectrum of compound 50

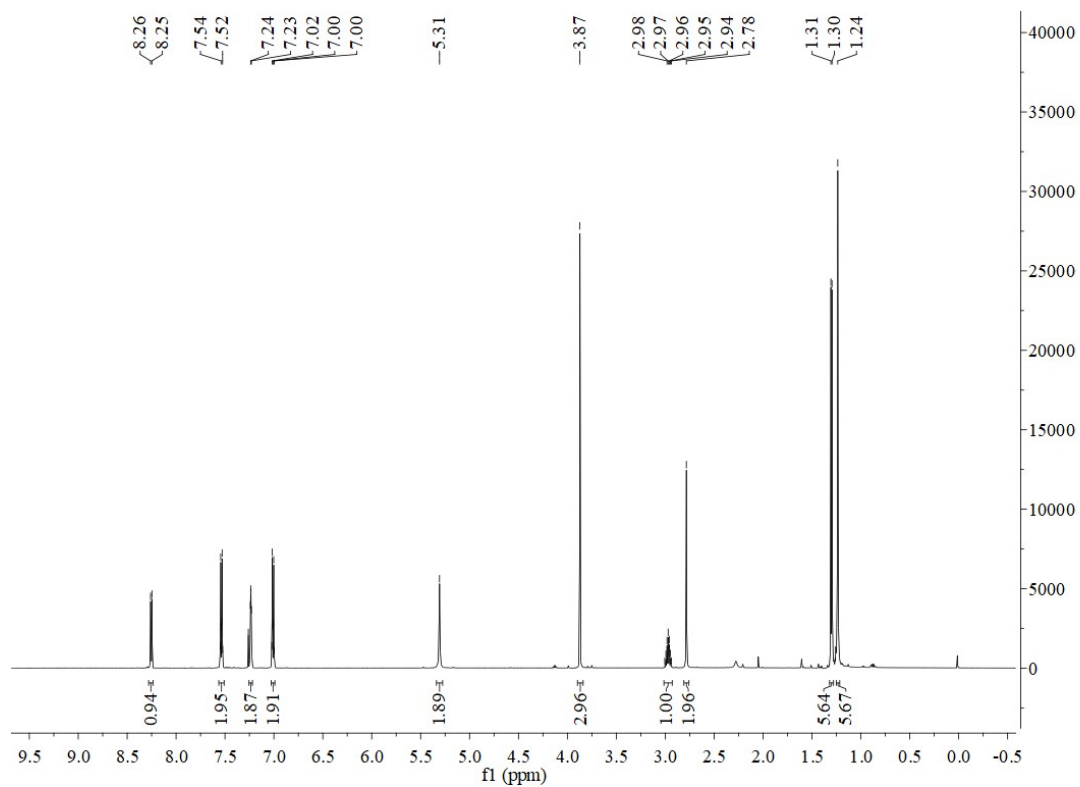

Figure 98. <sup>1</sup>H NMR spectrum of compound 50



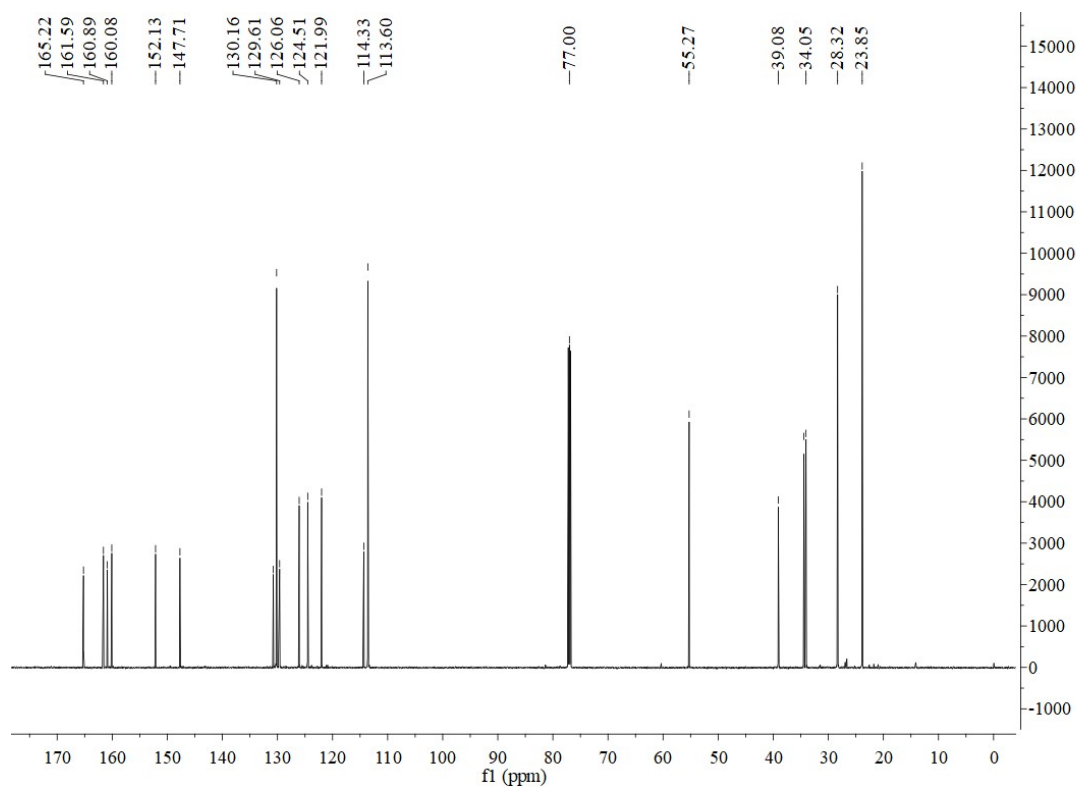

**Figure 99.**  $^{13}\text{C}$  NMR spectrum of compound **50**

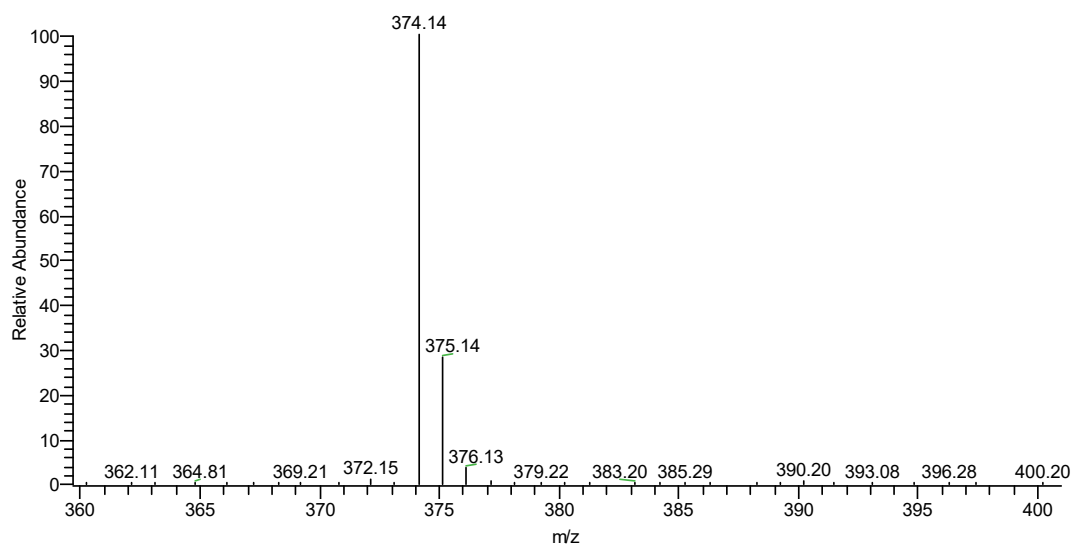

**Figure 100.** MS spectrum of compound **50**

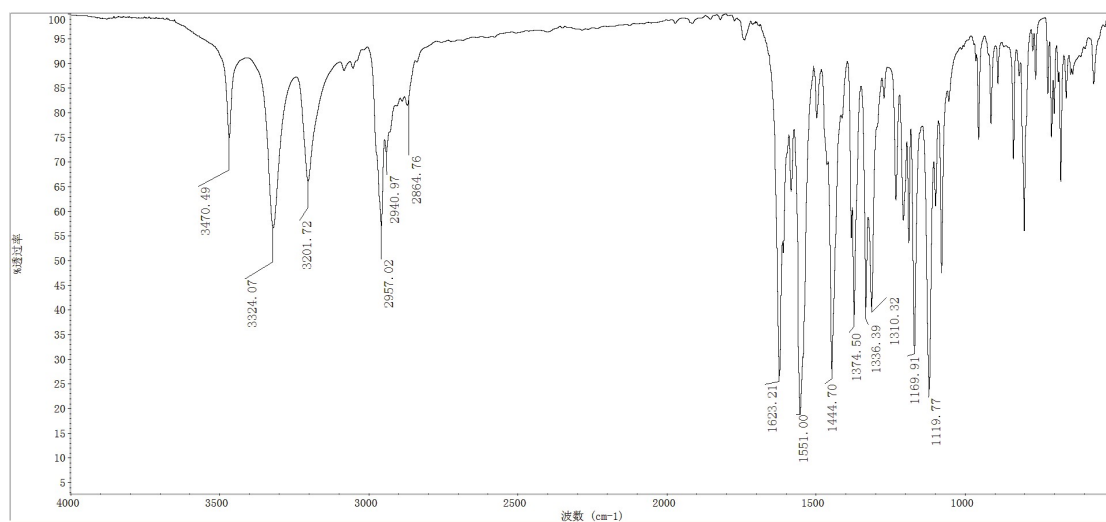

Figure 101. IR spectrum of compound 5p

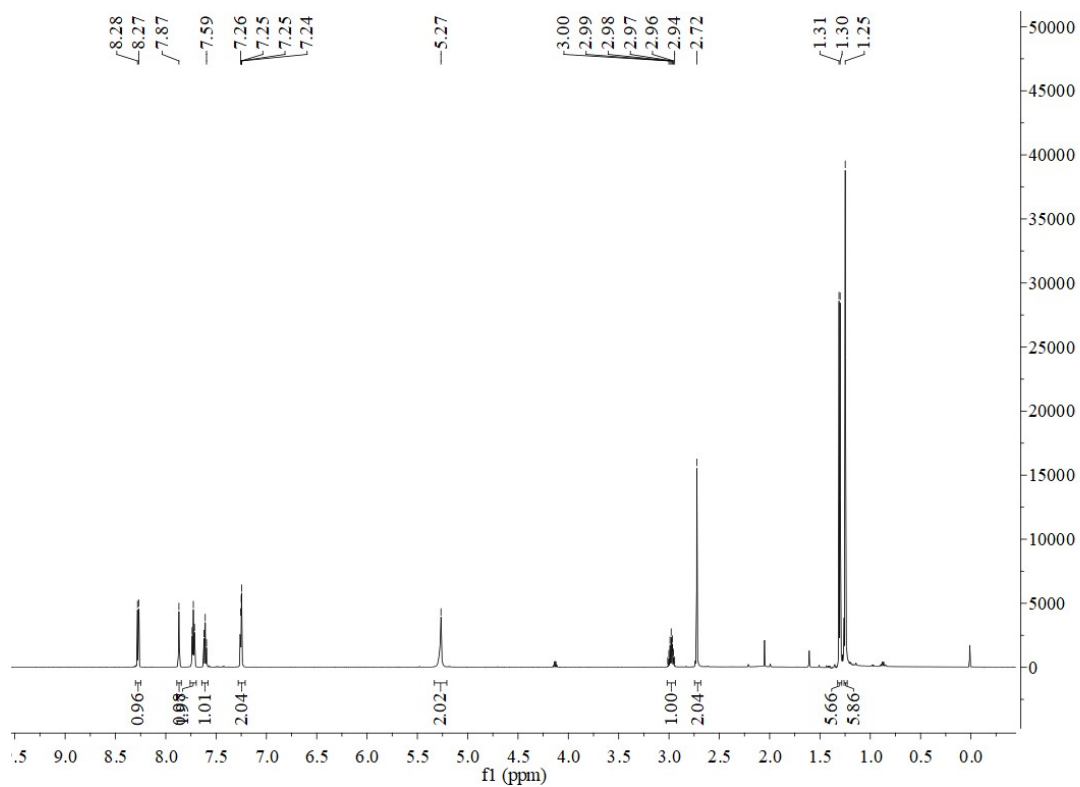

Figure 102. <sup>1</sup>H NMR spectrum of compound 5p

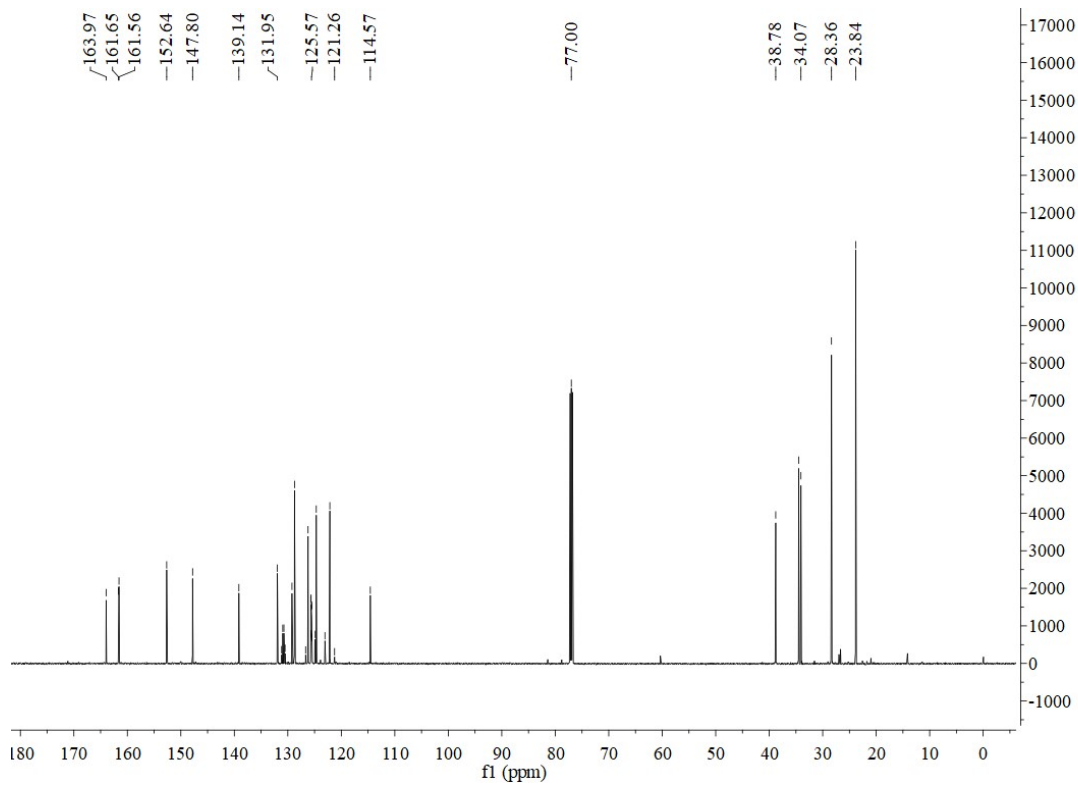

**Figure 103.**  $^{13}\text{C}$  NMR spectrum of compound **5p**

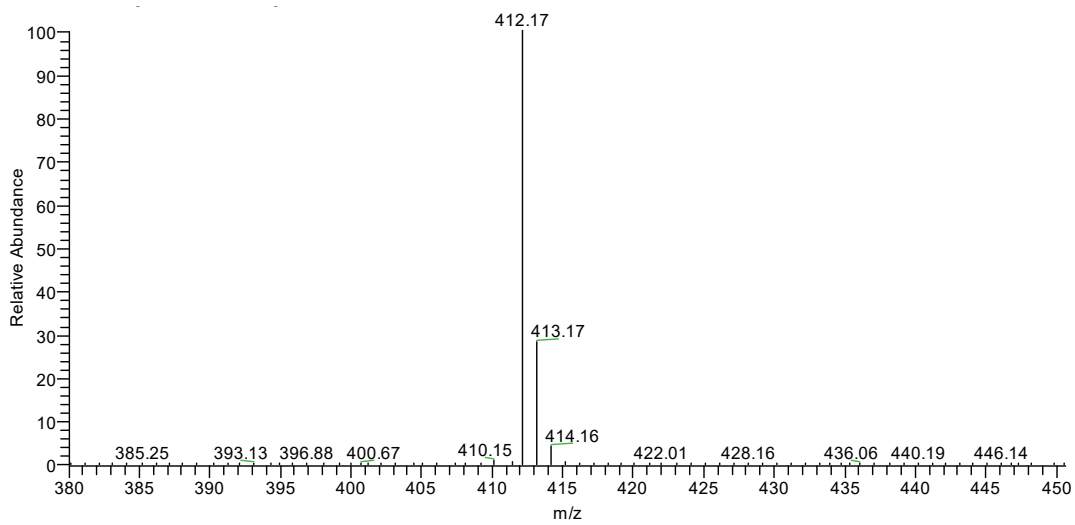

**Figure 104.** MS spectrum of compound **5p**

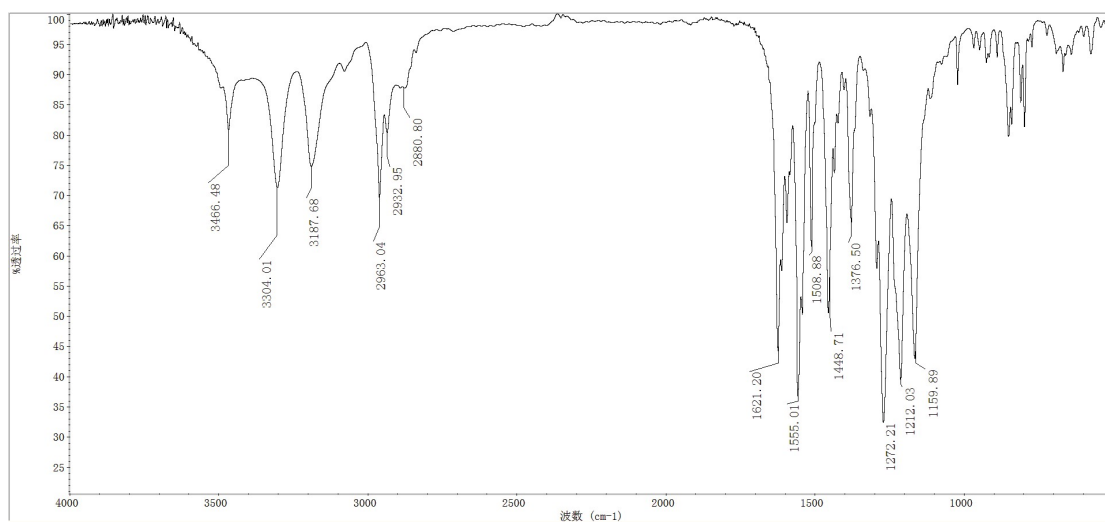

Figure 105. IR spectrum of compound **5q**

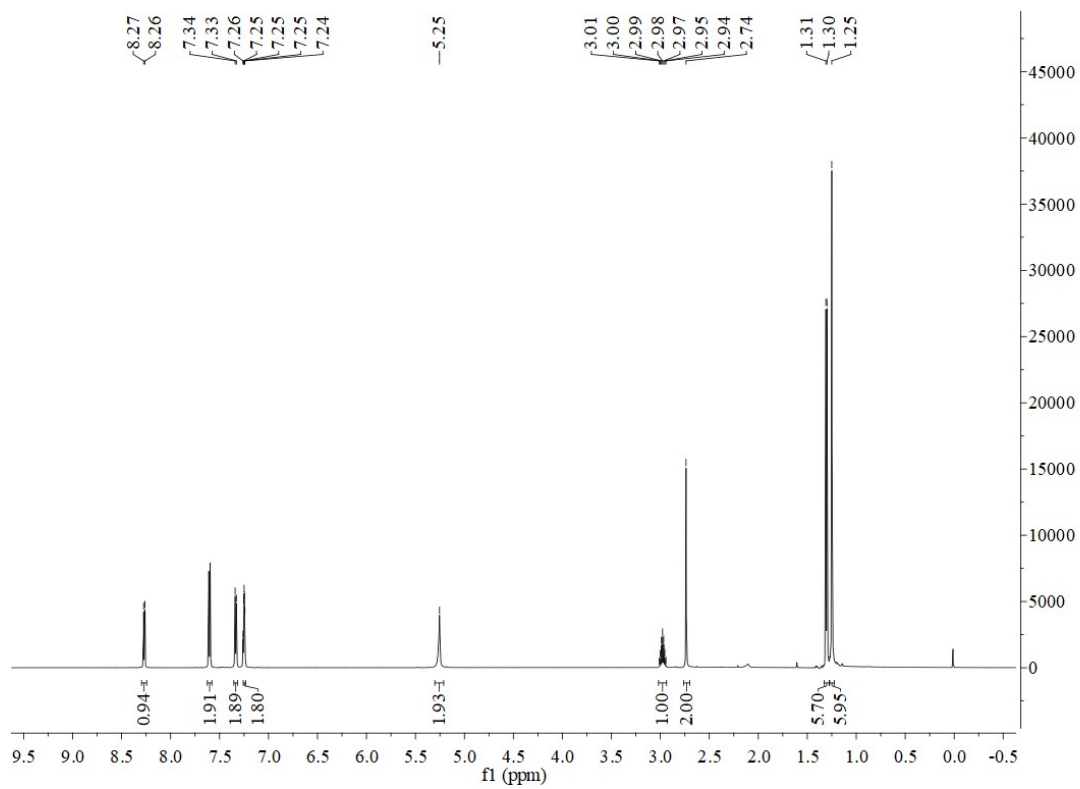

Figure 106.  $^1\text{H}$  NMR spectrum of compound **5q**

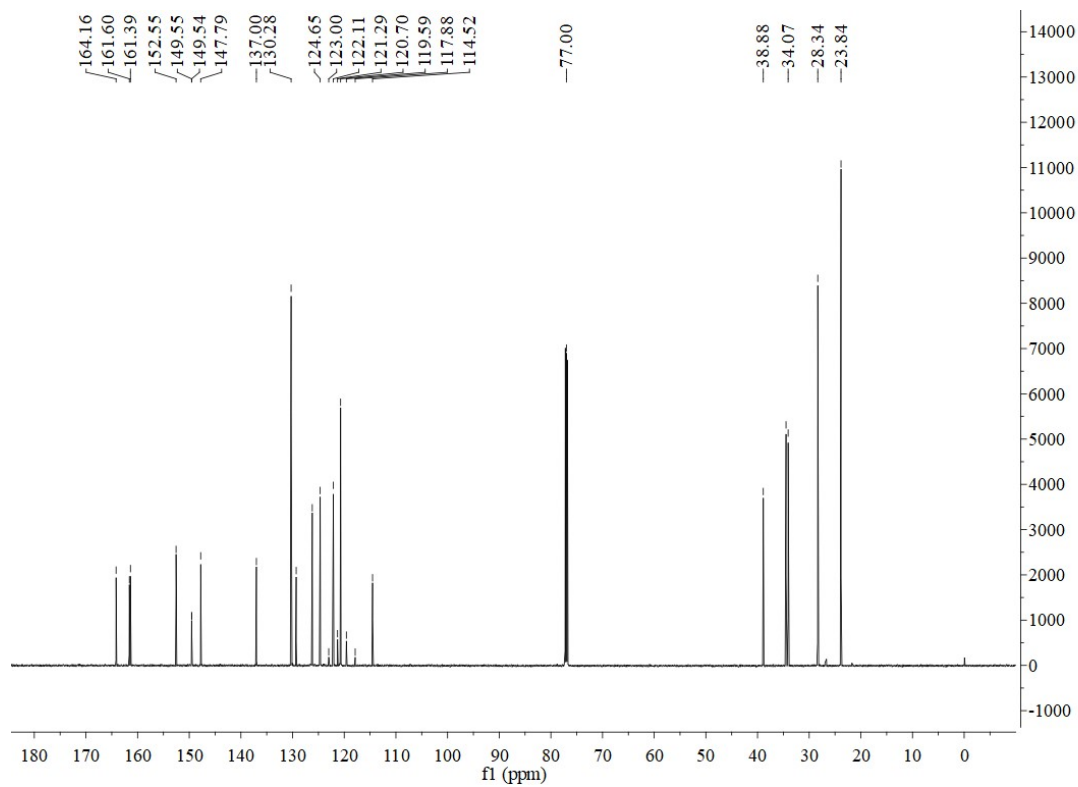

**Figure 107.**  $^{13}\text{C}$  NMR spectrum of compound **5r**

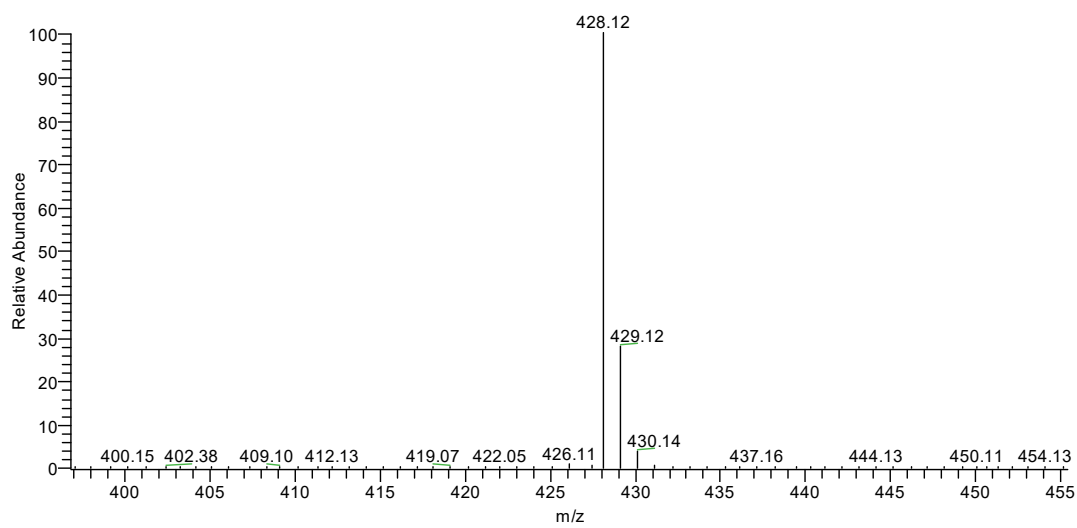

**Figure 108.** MS spectrum of compound **5q**

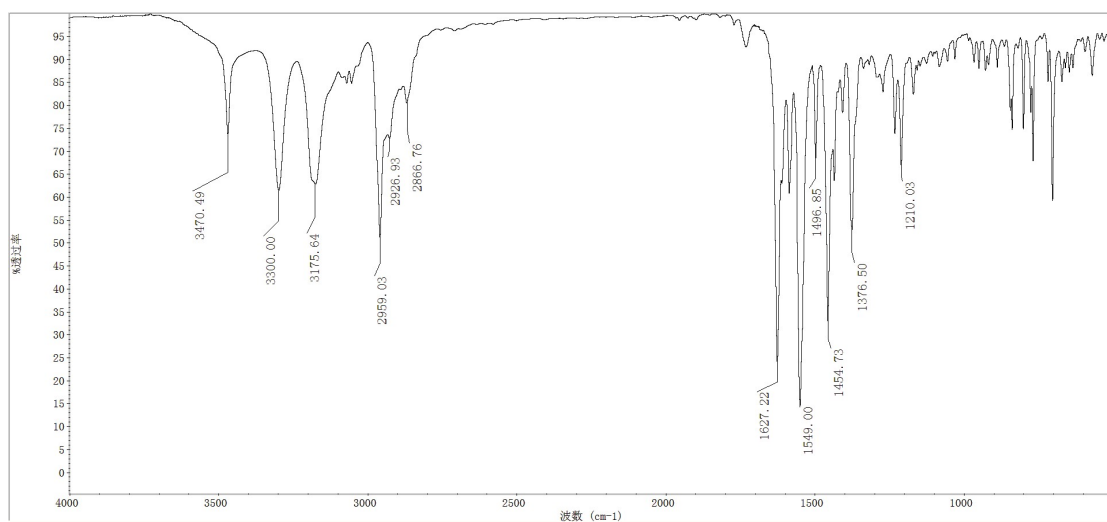

Figure 109. IR spectrum of compound 5r

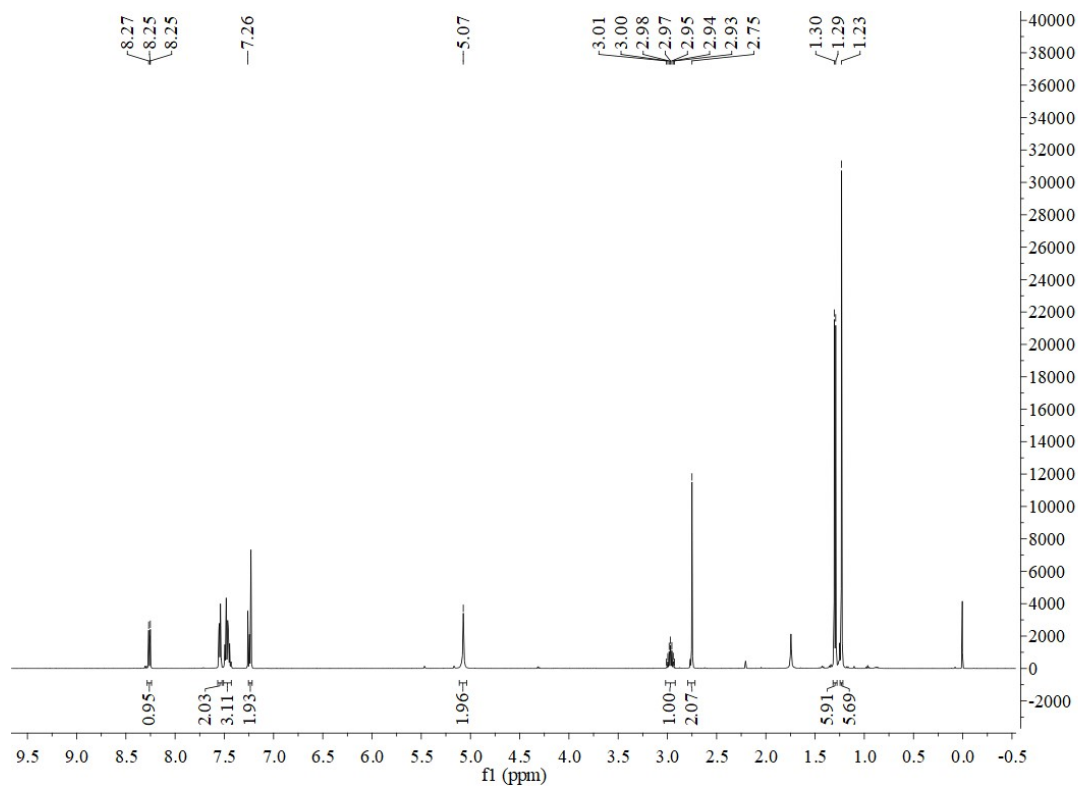

Figure 110. <sup>1</sup>H NMR spectrum of compound 5r

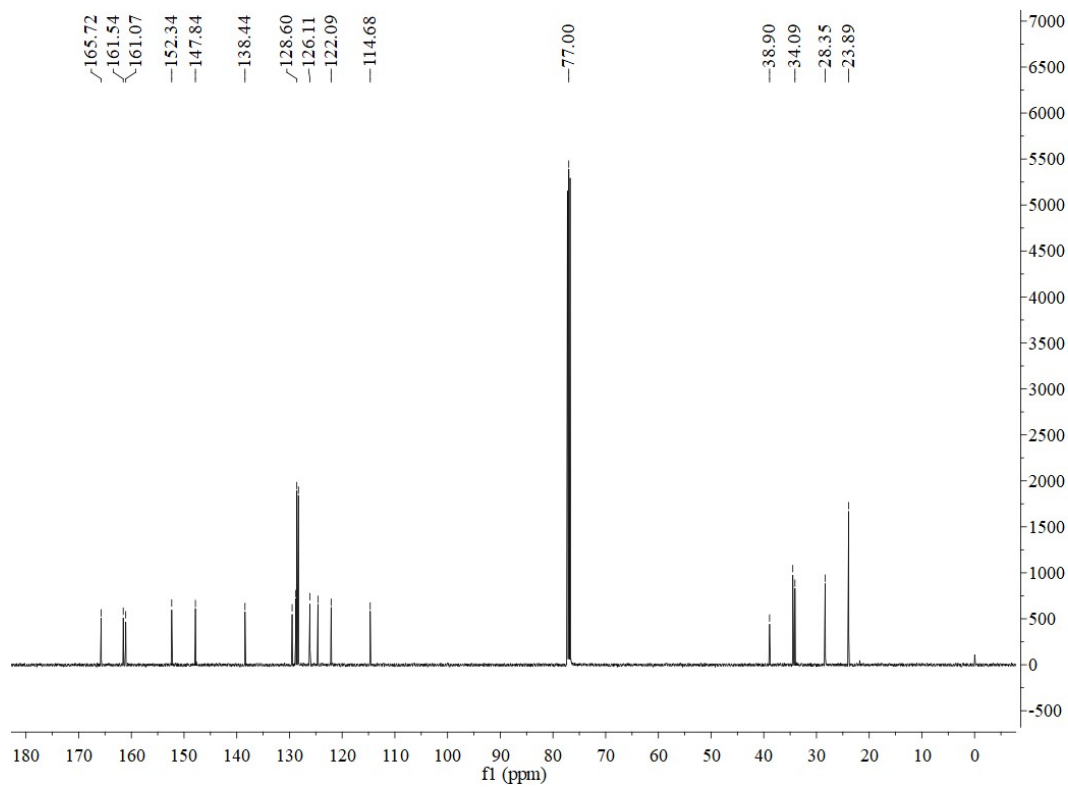

**Figure 111.**  $^{13}\text{C}$  NMR spectrum of compound **5r**

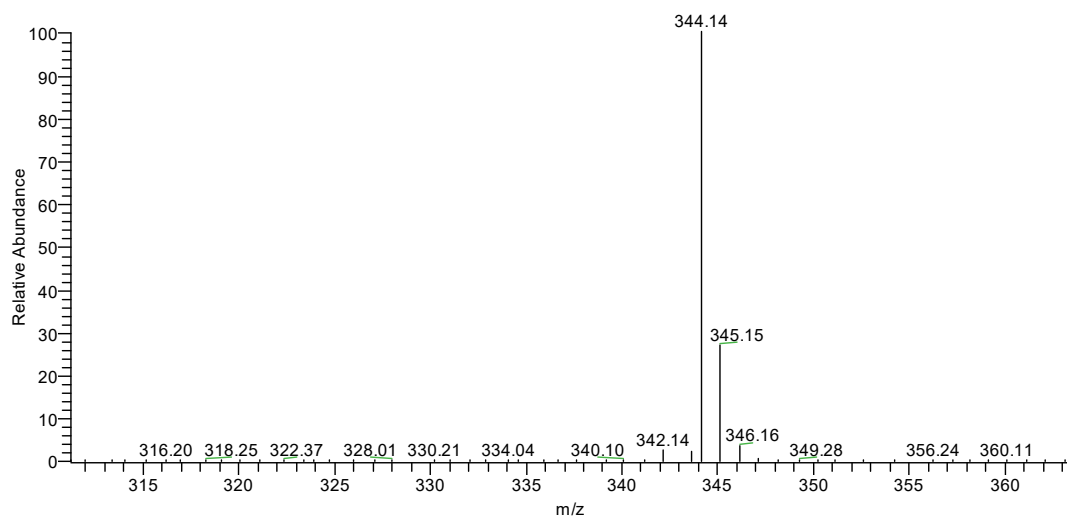

**Figure 112.** MS spectrum of compound **5r**
